# Supplementary material for: Spraying of dsRNA Molecules Derived from Phytophthora Infestans, as a Plant Protection Strategies for the Management of Potato Late Blight
Source: Preprints.org preprint supplement (doi:10.20944/preprints202102.0280.v1), 2021-02-11
Supplement: Supplementary file 1 [file supplementary]

**Supporting sequence 1:** Depicts 1080 nucleotide bases of *Phytophthora infestans* Sorbitol dehydrogenase gene

(Red highlighted fonts are siRNA effective region selected based on siRNA target finder software tools: Noble foundation psiRNA target finder tool, siDirect 2.0 etc)

ATGCAGAACTCGTGCGCCCCCATGCAAAACCTGTCGTTTGTCTCGAAAAGGGAGGCGCAGTCAAGTTCGAA  
GACCGTCCGGTGCCTGAGATCGTGGACCCTCACGACGTGATCGTGAACGTCCGCTACACTGGAATTTGTGGCA  
GTGACGTGCACTACTGCACGCACGGCTGTATTGGCAAGTACGTGGTGGACAAACCCATGGTTCTAGGACACG  
AATCCGCAGGTGTCGTGCACGCTGTGGGGTCCGCCGTCAAGACTCTCAAAGTAGGCGATGAAGTGGCCATGG  
AACCTGGAGTTCGCTGCCGACGATGCCAGCGTTGCCGCGAGGGAACTACAACCTTGTGTCCGGACATGGCAT  
TCGCGGCTACACCCCGTACGACGGAACATTGGCCAAGTTCTACCGCATCCCCGAGGATTTCTGCTACAACT  
GCCGTCCAACGTCAGTATGCAGGAAGGAGCGATGCTTGAACCCACTGCTGTTGCCGTTCACTTCTGCCGTCTA  
GCTAAAGTGAGTCCTGGCAACAAAGTTGTGGTGTGGTGTGCGGCCCGTGGGTCTGTTGACTTGCAAAGTG  
GCTCGGAACGTGTTTGGGGCTACGACGGTAGTCGCAGTGGACGTCAACGAGAAGCGTCTTGCGGTGCTATG  
GAACACGGTGCGACGCACGTGTTTCAGGGGAACTGGGTACGACGCCTCAGGAGACGGCCGAGCAAATTAT  
TGTAAGTGTGGACTGGGCGACGGCGCCGACATCGTGATCGATGCCAGTGGTGCTGAGTCTTGATCCAGAC  
GGCAATCTACGTCGCACGCAACGGAGGCACCTTCACACAGGGAGGAATGGGCAAGACGGACATTATGTTCCC  
AATTGGCATCATGTGTGGCAAGGAGTTACGTGTGACCGGCAGTTCCGCTACTCAGCAGGCGACTACCAACTA  
GCGCTCGACATGGTTGCAAGTGGCAAGCTGGAAGTCAGGAGGCTGATTTCAAGACTGTACCGTTCGAAGAA  
GCGAAGGAGGCTTTCGACAACGTCAAGCGCGGCAACGGCATCAAGTGGCTCATTGAAGGACCCAACTGA

CLUSTAL O(1.2.4) multiple sequence alignment of HP0823 *Phytophthora infestans* isolate with the reference sequence

|        |                                                                       |
|--------|-----------------------------------------------------------------------|
| PITG   | ATGCAGAACTCGTGCGCCCCCATGCAAAACCTGTCGTTTGTCTCGAAAAGGGAGGCGCA           |
| HP0823 | ATGCAGAACTAGTGCGCCCCCATGCAAAACCTGTGGTTTGTCTCGAAAAGGGAGGCGCA<br>*****  |
| PITG   | GTCAAGTTCGAAGACCGTCCGGTGCCTGAGATCGTGGACCCTCACGACGTGATCGTGAAC          |
| HP0823 | GTCAAGTTCGAAGACCGTCCGGTGCCTGAGATCGTGGAGCCTCACGACGTGATCGTGAAC<br>***** |
| PITG   | GTCCGCTACACTGGAATTTGTGGCAGTGACGTGCACTACTGCACGCACGGCTGTATTGGC          |
| HP0823 | GTCCGCTACACTGGAATTTGTGGCAGTGACGTGCACTACTGCACGCACGGCTGTATTGGC<br>***** |
| PITG   | AAGTACGTGGTGGACAAACCCATGGTTCTAGGACACGAATCCGCAGGTGTCGTGCACGCT          |
| HP0823 | AAGTACGTGGTGGACAAACCCATGGGTCTAGGACACGAATCCGCAGGTGTCGTGCACGCT<br>***** |
| PITG   | GTGGGGTCCGCCGTCAAGACTCTCAAAGTAGGCGATGAAGTGGCCATGGAACCTGGAGTT          |
| HP0823 | GTGGGGTCCGCCGTCAAGACTCTCAAAGTAGGCGATGAAGTGGCCATGGAACCTGGAGTT<br>***** |
| PITG   | CCGTGCCGACGATGCCAGCGTTGCCGCGAGGGAACTACAACCTTGTGTCCGGACATGGCA          |
| HP0823 | TCGTGCCGACGATGCCAGCGTTGCCGCGAGGGAACTACAACCTTGTGTCCGGACATGGCA<br>***** |
| PITG   | TTCCGCGCTACACCCCGTACGACGGAACATTGGCCAAGTTCTACCGCATCCCCGAGGAT           |
| HP0823 | TTCCGCGCTACACCCCGTACGACGGAACATTGGCCAAGTTCTACCGCATCCCCGAGGAT<br>*****  |
| PITG   | TTCTGTACAAACTGCCGTCCAACGTCAAGTATGCAGGAAGGAGCGATGCTTGAACCCACT          |
| HP0823 | TTCTGTACAAACTGCCGTCCAACGTCAAGTATGCAGGAAGGAGCGATGCTTGAACCCACT          |

```

*****

PITG      GCTGTTGCCGTTCACTTCTGCCGTCTAGCTAAAGTGAGTCTGGCAACAAAGTTGTGGTG
HP0823    GCTGTTGCCGTTCACTTCTGCCGTCTAGCTAAAGTGAGTCTGGCAAA-AAGTTGTGGTG
*****

PITG      TTTGGTGTCGGCCCCGTGGGTCTGTTGACTTGCAAAGTGGCTCGGAACGTGTTTGGGGCT
HP0823    TTTGGTGTCGGCCCCGTGGGTCCGTTGACTTGCAAAGTGGCTCGGAACGTGTTTGGGGCT
*****

PITG      ACGACGGTAGTCGCAGTGGACGTCAACGAGAAGCGTCTTGCGGTGCGTATGGAACACGGT
HP0823    ACGACGGTAGTCGCAGTGGACGTCAACGAGAAGCGTCTTGCGGTGCGTATGGAACACGGT
*****

PITG      GCGACGCACGTGTTTCAGGGGAAACTGGGTACGACGCCTCAGGAGACGGCCGAGCAAATT
HP0823    GCGACGCACGTGTTTCAGGGGAAACTGGGTACGACGCCTCAGGAGACGGCCGAGCAAATT
*****

PITG      ATTGTAGAGTGTGGACTGGGCGACGGCGCCGACATCGTGATCGATGCCAGTGGTGCTGAG
HP0823    ATTGTAGAGTGTGGACTGGGCGACGGCGCCGACATCGTGATCGATGCCAGTGGTGCTGAG
*****

PITG      TCTTGCATCCAGACGGCAATCTACGTCGCACGCAACGGAGGCACCTTCACACAGGGAGGA
HP0823    TCTTGCATCCAGACGGCAATCTACGTCGCACGCAACGGAGGCACCTTCACACAGGGAGGA
*****

PITG      ATGGGCAAGACGGACATTATGTTCCCAATTGGCATCATGTGTGGCAAGGAGTTACGTGTG
HP0823    ATGGGCAAGACGGACATTATGTTCCCAATTGGCATCATGTGTGGCAAGGAGTTACGTGTG
*****

PITG      ACCGGCAGTTTCCGCTACTCAGCAGGCGACTACCAACTAGCGCTCGACATGGTTGCAAGT
HP0823    ACCGGCAGTTTCCGCTACTCAGCAGGCGACTACCAACTAGCGCTCGACATGGTTGCAAGT
*****

PITG      GGCAAGCTGGAAGTCAGGAGGCTGATTTCGAAGACTGTACCGTTTCAAGAAGCGAAGGAG
HP0823    GGCAAGCTGGAAGTCAGGAGGCTGATTTCGAAGACTGTACCGTTTCAAGAAGTGAAGGAG
*****

PITG      GCTTTCGACAACGTCAAGCGCGGCAACGGCATCAAGTGGCTCATTGAAGGACCCAACTGA
HP0823    GCTTTCGACAACGTCAAGCGCGGCAACGGCATCAAGTGGCTCATTGAAGGACCCAACTGA
*****

```

**Supporting sequence 2:** Depicts 1332 nucleotide bases of *P. infestans* Translation elongation factor1-alpha

ATGGGCAAGGAAAAGGTTACATCTCGCTGGTCGTCATTGGCCACGTCGACGCCGGTAAGTCGACCACCACC  
 GGCACTTGATCTACAAGTGC GGCGGTATCGACAAGCGTACCATCGAGAAGTTCGAGAAGGAGGCTGCCGAG  
 CTCGGCAAGACCTCGTTCAAGTACGCCTGGGTGCTTGACAACCTGAAGGCCGAGCGTGAGCGTGGTATCACG  
 ATCGACATTGCCCTGTGGAAGTTCGAGTCCCCAAGTACTTCTTACGGTCATTGACGCCCTGGTCACCGTGA  
 CTTTCATCAAGAACATGATTACGGGTACCTCGCAGGCCGATTGCGCCATTCTGGTGGTCGCTTCGGGTGTGGGT  
 GAGTTCGAGGCTGGTATCTCCAAGGAGGGCCAGACTCGTGAGCACGCTCTGCTTGCTTCACTCTGGGTGTGA  
 AGCAGATGATCGTCGCCATCAACAAGATGGACGACTCGTCTGTATGTACGGCCAGGCCCGTTACGAGGAGA  
 TCAAGTCTGAGGTCACCACGTACCTGAAGAAGGTTGGCTACAAGCCCGCCAAGATCCCGTTCTGTCCTATCTC  
 CGGCTGGGAGGGTGACAACATGATCGACCGCTCCACCAACATGCCGTGGTACAAGGGACCTTTCCTCCTTGA  
 GGCTCTTGACAACCTGAACGCCCCCAAGCGCCCGTCGGACAAGCCGCTGCGTCTGCCCTTCAGGACGTGTAC  
 AAGATCGGCGGTATTGGCACGGTACCTGTGCGCCGTGTGGAGACCGGTGTCATCAAGCCTGGCATGGTCGCC  
 ACTTTCGGCCCCGTTGGTCTGTGCGACTGAAGTCAAGTCTGTGAGATGCACCACGAGTCTCTGCCTGAAGCTG  
 TCCCTGGTGACAACGTGCGCTCAACGTCAAGAACGTGTGCGTCAAGGAGCTGCGTCGTGGTTTCGTGCTTC  
 GGAATCCAAGAACGACCCTGCTAAGGCAACCCAGGACTTCACCGCCAGGTGATTGTGCTGAACCACCCTGGT  
 CAGATCGGCAACGGTTACTCGCCTGTGCTTACTGCCACACGGCCACGTTGCCTGCAAGTTAAAGAGATTA

CGGAGAAGATGGACCGTCGTTCTGGGCAAGGTGCTCGAGACTGCCCCCAAGTTCGTCAAGTCGGGTGATGCCT  
GCATGGTCATCCTCGAGCCGTGAAGCCCATGACCGTCGAGTCGTTCCAGGAGTACCCTCCTCTGGGCCGTTT  
CGCCGTGCGTGACATGCGTCAGACCGTTGCCGTCGGTGTATCAAGTCGGTGAACAAGAAGGAAGCTTCGGG  
CAAGGGTGGTGCCAAGAAGAAATAA

b) Effective siRNA region of Translation elongation factor 1-alpha gene used for dsRNA construct

ACAAGTGC GGCGGTATCGACAAGCGTACCATCGAGAAGTTCGAGAAGGAGGCTGCCGAGCTCGGCAAGACC  
TCGTTCAAGTACGCCTGGGTGCTTGACAACCTGAAGGCCGAGCGTGAGCGTGGTATCACGATCGACATTGCC  
TGTGGAAGTTCGAGTCCCCAAGTACTTCTTACGGTCATTGACGCCCTGGTCACCGTGACTTCATCAAGAAC  
ATGATTACGGGTACCTCGCAGGCCGATTGCGCCATTCTGGTGGTCGCTTCGGGTGTGGGTGAGTTCGAGGCT  
GGTATCTCAAGGAGGGCCAGACTCGTGAGCAGCTCTGCTTGCTTCACTCTGGGTGTGAAGCAGATGATCG  
TCGCCATCAACAAGATGGACGACTCGTCTGTATGTACG

CLUSTAL O(1.2.4) multiple sequence alignment of HP0823 *Phytophthora infestans* isolate with the reference sequence

|        |                                                               |
|--------|---------------------------------------------------------------|
| HP0823 | -----                                                         |
| PITG   | ATGGGCAAGGAAAAGGTTACATCTCGCTGGTCGTCATTGGCCACGTCGACGCCGGTAAG   |
|        |                                                               |
|        | T7 Promoter                                                   |
| HP0823 | TTAATACGACTCACTATAGGGAGCTACAAGTGC GGCGGTATCGACAAGCGTACCATCGAG |
| PITG   | TCGACCACCACCGGTCATTGATCTACAAGTGC GGCGGTATCGACAAGCGTACCATCGAG  |
|        | -----*****                                                    |
| HP0823 | AAGTTCGAGAAGGAGGCTGCCGAGCTCGGCAAGACCTCGTTCAAGTACGCCTGGGTGCTT  |
| PITG   | AAGTTCGAGAAGGAGGCTGCCGAGCTCGGCAAGACCTCGTTCAAGTACGCCTGGGTGCTT  |
|        | *****                                                         |
| HP0823 | GACAACCTGAAGGCCGAGCGTGAGCGTGGTATCACGACCGACATTGCCCTGTGGAAGTTC  |
| PITG   | GACAACCTGAAGGCCGAGCGTGAGCGTGGTATCACGATCGACATTGCCCTGTGGAAGTTC  |
|        | *****                                                         |
| HP0823 | GAGTCCCCAAGTACTTCTTACGGTCATTGACGCCCTGGTCACCGTGACTTCATCAAG     |
| PITG   | GAGTCCCCAAGTACTTCTTACGGTCATTGACGCCCTGGTCACCGTGACTTCATCAAG     |
|        | *****                                                         |
| HP0823 | AACATGATTACGGGTACCTCGCAGGCCGATTGCGCCATTCTGGTGGTCGCTTCGGGTGTG  |
| PITG   | AACATGATTACGGGTACCTCGCAGGCCGATTGCGCCATTCTGGTGGTCGCTTCGGGTGTG  |
|        | *****                                                         |
| HP0823 | GGTGAGTTCGAGGCTGGTATCTCCAAGGAGGGCCAGACTCGTGAGCAGCTCTGCTTGCC   |
| PITG   | GGTGAGTTCGAGGCTGGTATCTCCAAGGAGGGCCAGACTCGTGAGCAGCTCTGCTTGCC   |
|        | *****                                                         |
| HP0823 | TTCACTCTGGGTGTGAAGCAGATGATCGTCGCCATTAAACAAGATGGACGACTCGTCTGTC |
| PITG   | TTCACTCTGGGTGTGAAGCAGATGATCGTCGCCATTAAACAAGATGGACGACTCGTCTGTC |
|        | *****                                                         |
| HP0823 | ATGTACG                                                       |
| PITG   | ATGTACGGCCAGGCCGTTACGAGGAGATCAAGTCTGAGGTCACCACGTACCTGAAGAAG   |
|        | *****                                                         |

**Supporting Sequence 3:** Depicts 2121 nucleotide bases of *P. infestans* Heat Shock Protein 90

ATGAGCGCCGCGGAAGCTGAAACGTTGCCTTCTCGGC **CGATATCAACCAGCTGCTGAGTC** TGATCATTAAACA  
CGTTCTACTCGAACAAGGACATTTTCTGCGTGAGCTCATCTCGAACGCCTCGGATGCCCTCGACAAGATCCGC  
TACTCGTCGCTGACCGACGCCAGCGTGCTGGACACGGACAAGAACCTGGAGATCAAGGTGACCCCGGACAAAG

GCCAACGGCACGCTGACCATCCAGGACTCTGGTATTGGTATGACGAAGGCTGACCTGATTAAACAACCTGGGT  
 ACGATCGCCAAGTCGGGCACCAAGGCCTTCATGGAGGCTCTGGCTGCTGGCGCCGACATCAGTATGATTGGT  
 CAGTTCGGTGTGGGTTTCTACTCGGCCTACCTGGTCGCTGACAAGGTCGTGGTGCACTCGAAGCACAACGATG  
 ACGAGCAGTACGTGTGGGAGTCTGCTGCCGGTGGCTCGTTCACTGTACGCCCCGACACGTCGGAGCCCATCC  
 AGCGCGGTACGCGCATTGTGCTGAAGCTCAAGGAGGACATGCTCGAGTACCTTGAGGAGCGCAAGCTTAAG  
 GACCTGGTGAAGAAGCACTCGGAGTTCATTGGCTTCCCCATCAAGCTGTACGTCGAGAAGACGGAGGAGAAG  
 GAAGTGACGGACGACGAGGAAGAGGAGGACGAGAAGGAGGGCGAGGACGACAAGCCCAAGGTCGAGGAG  
 GTCGAAGAGGAGGAAGGCGAGAAGAAGAAGACTAAGAAGATTAAGGAAGTGACCCACGAGTGGGACC  
 ACCTCAACAGCCAGAAGCCCATCTGGATGCGCAAGCCTGAAGACGTGACCCACGAGGAGTACGCGTCGTTCT  
 ACAAGTCGCTGACGAACGACTGGGAGGAGCACGCCGGCGTCAAGCACTTTTCGGTGGAGGGCCAGCTGGAG  
 TTCAAGGCCTGTCTGTTACCCCCAAGCGCGCGCGCTTCGACATGTTTGAGGGCGGCGCCAAGAAGAAAGTG  
 AACAACATCAAGCTGTACGTGCGTCGCTTTCATCATGGACAAGTGCAGGAGCTCATGCCCGAGTACCTGT  
 CGTTCGTCAAGGGTGTGTCGACTCGGAGGACTTGCCGCTTAACATCTCGCGTGAGACGCTGCAGCAGAACA  
 AGATCCTACGTGTGATCAAGAAGAACTGGTCAAGAAGTGCCTCGAGATGTTCCGCCAACTGGCTGAGGACA  
 ACGAGAAGTACAACAAGTTCTACGAGTCGTTCAAGCAAGAACTCAAGCTGGGCATCCACGAGGACTCGACCA  
 ACCGCACCAAGATCGCCAAGCTGCTGCGTTACCACTCCACCAAGTCTGGCGAGGAAGTGACGTCGCTGGATG  
 ACTACATCTCGCGTATGCCTGAGAGCCAGCCGGTATCTACTACGTGACTGGCGAGAGCAAGAAGTCGGTGG  
 AGAACTCGCCATTCAATTGAGAAGCTCAAGAAGAAGGGCTACGAGGTGCTGTTTCAATGGTGGAGGCCATTGACG  
 AGTACGCTGTGCAGCAGCTCAAGGAGTACGAGGGCAAGAAGCTCATCTGCGCCACCAAGGAGGGCCCTCAAG  
 ATGGAGGAGACGGAGGACGAGAAGAAGTCGTTTCGAGGAGGCCAAGGCTGCCACTGAAGGACTGTGCAAGC  
 TCATGAAGGAGGTGCTGGACGACAAGGTGGAGAAGGTGGAGATCTGAACCGTATTGTGGAGTCGCCCTGT  
 GTGCTTGTTACCGGCGAGTACGGCTGGTCGGCCAACATGGAGCGCATCATGAAGGCGCAGGCTCTGCGTGAC  
 AGCAGCACGTGGCCTACATGTGTCGAAGAAGACGATGGAGATCAACCCGCTGCACCCTATTATCAAGTCGC  
 TGGCGGAGAAGGCGGAGGCTGACAAGAGCGACAAGACGGTCAAGGACCTCATCTGGCTGCTGTACGACACG  
 TCGCTGCTGACCTCGGGCTTCAGCCTGGATGAGCCCACTACGTTTCGCTAACCGTATCCACCGTCTTATCAAGCT  
 TGGTCTGAGCATTGACGACGATGATGATGCCGCTGACGAGTCGATGGAAGACCTGCCCCCTCTTGAGGGCGA  
 GGACGAGGAGGAGAGCACGATGGAGGAGGTCGACTAA

Effective siRNA region of the HSP90 gene used for dsRNA construct

CGATATCAACCAGCTGCTGAGTCTGATCATTAACACGTTCTACTCGAACAAGGACATTTTCTGCGTGAGCTCA  
 TCTCGAACGCCTCGGATGCCCTCGACAAGATCCGCTACTCGTCGCTGACCGACGCCAGCGTGCTGGACACGGA  
 CAAGAACCTGGAGATCAAGGTGACCCCGACAAGGCCAACGGCACGCTGACCATCCAGGACTCTGGTATTGG  
 TATGACGAAGGCTGACCTGATTAAACAACCTGGGTACGATCGCCAAGTCGGGCACCAAGGCCTTCATGGAGGC  
 TCTGGCTGCTGGCGCCGACATCAGTATGATTGGTCAGTTCGGTGTGGGTTTCTACTCGGCCTACCTGGTCGCT  
 GACAAGGTCGTGGTGCACTCGAAGCACAACGATGACGAGCAGTACGTGTGGGAGTCTGCTG

CLUSTAL O(1.2.4) multiple sequence alignment of HP0823 *Phytophthora infestans* isolate with the reference sequence

|        |                                                              | T7 promoter                                      |
|--------|--------------------------------------------------------------|--------------------------------------------------|
| HP0823 | -----                                                        | TAATACGACTCACTATAGGGAGCGATATCAAC                 |
| PITG   | -----                                                        | ATGAGCGCCGCGGAAGCTGAAACGTTTCGCTTCTCGGCCGATATCAAC |
|        |                                                              | *****                                            |
| HP0823 | CAGCTGCTGAGTCTGATCATTAACACGTTCTACTCGAACAAGGACATTTTCTGCGTGAG  |                                                  |
| PITG   | CAGCTGCTGAGTCTGATCATTAACACGTTCTACTCGAACAAGGACATTTTCTGCGTGAG  |                                                  |
|        | *****                                                        |                                                  |
| HP0823 | CTCATCTCGAACGCCTCGGATGCCCTCGACAAGATCCGCTACTCGTCGCTGACCGACGCC |                                                  |
| PITG   | CTCATCTCGAACGCCTCGGATGCCCTCGACAAGATCCGCTACTCGTCGCTGACCGACGCC |                                                  |
|        | *****                                                        |                                                  |

HP0823 AGCGTGCTGGACACGGACAAGAACCTGGAGATCAAGGTGACCCCGGACAAGGCCAACGGC  
PITG AGCGTGCTGGACACGGACAAGAACCTGGAGATCAAGGTGACCCCGGACAAGGCCAACGGC  
\*\*\*\*\*

HP0823 ACGCTGACCATCCAGGACTCTGGTATTGGTATGACGAAGGCTGACCTGATTAACAACCTG  
PITG ACGCTGACCATCCAGGACTCTGGTATTGGTATGACGAAGGCTGACCTGATTAACAACCTG  
\*\*\*\*\*

HP0823 GGTACGATCGCCAAGTCGGGCACCAAGGCCTTCATGGAGGCTCTGGCTGCTGGCGCCGAC  
PITG GGTACGATCGCCAAGTCGGGCACCAAGGCCTTCATGGAGGCTCTGGCTGCTGGCGCCGAC  
\*\*\*\*\*

HP0823 ATCAGTATGATTGGTCAGTTCCGGTGTGGGTTTCTACTCGGCCTACCTGGTCGCTGACAA  
PITG ATCAGTATGATTGGTCAGTTCCGGTGTGGGTTTCTACTCGGCCTACCTGGTCGCTGACAA  
\*\*\*\*\*

HP0823 GTCGTGGTGCACTCGAAGCACAACGATGACGAGCAGTACGTGTGGGAGTCTGCTGCTCCC  
PITG GTCGTGGTGCACTCGAAGCACAACGATGACGAGCAGTACGTGTGGGAGTCTGCTGCCGGT  
\*\*\*\*\*

HP0823 -----  
PITG GGCTCGTTCACTGTACGCCCCGACACGTCGGAGCCCATCCAGCGCGGTACGCGCATTG

**Supporting sequence 4:** Depicts 423 nucleotide bases of *P. infestans* GPI-anchored acidic serine-threonine rich HAM34-like protein

ATGAAGGTCTTCCAGCTCCTCGCCATCGCCGCTCTCGCCGTCGCTGCTGTCAACGGTCAGACTTCAGCTG  
ATGCCTCCACCGCCGCTCCGCGCTGCGGCTACGACGTCTGCTGCGACTTCGACCGCTCTTCCGCTGC  
TGCGGACACGGCCGCTGCCACCTCGACGGCCGCTTCAGGCATGGACAGCAGCATGAACATGACGTCCAGC  
GGCACGACCGACTCGACCGAGGCCACAAGCACCCGCTGGCTCGGCTGCTGTTCGGTTTCGGAGGACTCGGCCA  
CGGAGTCTTTCGAGCACCAAGGAGTCTCTCGGGCTCGGCGGATGCGAGCGCCTCGGCCCTCAGGCTCCAGCGG  
TGCTTCTCAGATCTCAGGCGCCATGGGTGCAGCCACCGCCCGCTGCTGGCCGTGGGCACTTACTTCTCTG  
TAA

**Supporting sequence 5:** Depicts 1677 nucleotide bases of *P. infestans* phospholipase D like-3

ATGCTTGTACTCTTCTTCATTTACGCGATAGCGGCATCTACGACTTCATCGGCATTTTTCGGTGTGTTGGCA  
CCGATGATACCCCGGCACCGAAGCGGATTTATCCGATGGAACGGACATCAAAGTCCGGCAGCCTCTCCT  
TAAAGCAACAGACTGGTTCTCACCAGAAAGGAAATCACCGATTTCGCGAGGCGGCATCCACGCAGCGAT  
TTAGCGGCCTACACGACAGGCAACGCGGTGACATCCTTCACAGTTACGAAAGATTTCTACGACTCGGTTT  
ACGAGGACCTGACAAAGACGAAGGAAGGAGATCGAGTACTACTTTTCGGCGTACGCTACAGCCCTGATCCC  
ATTAAAACCGGATATCGACCCTACAGGCGCTACGACAGGAGTTGGCAAAGTGCTCACGGATGTTGTGAAG  
CGCGGAGGTAATATCAACATCTCAACTGGCAGAATCTGAAGTACAGATACTTCAATCTCAAGGCTCGCG  
ATGCTATCAACGCCATTCCAGTATCTCCAATAAATGGGGCCAAAGCAGTTCTTCTGTTCGACGACCGCCT  
CCCGACTATGGTGTCTGCTTACCACCAGAAACTATGGTTATCTTGTCCGACAACGCCTCAGGTAGTGAG  
GAGCAGCCAGTGCGTTACGTGGGTGGATTGGATCTAGCAACCGACCGGTGGGATACTATCGACCACAATA  
ACTCGGCTATTTCGCGATGCAAGCGGAATTACGTTTAAGGTCCAAGGGTGGATTGACGGCCACATTTCGCAT  
TCACGGGCCTGCAGCGAAAGATGTGGCGAACAACCTTTATTTCCACGGTGGAACTCCGACTACCTGCCTAGC  
CAAAGTATTGAGGACGACGTGATGGACTTCGAGAACCCGTCATACGAACACATCCCACAGATGAAGTACG  
CCAGTAGCAATACCACTGGCAAATTCGGCAAACAGAGTGTCCAGATCACGAGAACATTCAGCTGCACCTA  
CAAACACTACAAGGAATTTGCTCCTCGGGGAGAGAATTCGCTCTTCCACGCACGTATCAAGGCCATCAAG  
AACGCGAAGAACTTCATCTTTATCGAAGACCAGTATTTTATTTATGTACCGGAACCTTATGGACGCTATCA  
TGGAAGTCATGCCCAAGATCCAGCGCTTGATTGTTTTTGCCAATCCTCAAACAAGCCCGTTCTCAAACGC  
AGGATATATTAAATACCTGTACGAGATGGTTTACCAATCCGAGAGAAAGTTCCCAACAAGTTCAAGATC

TACACGACCAAGGCAGACCGGAACCTCATGCTGCACAGTAAAGTCGTGATCATTGACGACGTGTATTTGT  
 CCGTTGGCTCGGCAAACCTGGAATCGTCTGAAGTATGACGTCTGGACCCAGAGCTTAACGCGGAGGTTGTTGA  
 CGAGGAGACCGTGAAATCTCCTGAAGGCGTCACTGTAGGGAACTACCTCGTGATTATCGTATTGAAAA  
 TTTGTGGAAATGACGGGATTGAGCTACGATGAACTTGATGCGATGACGTTTATCGAGGCGGCAAGCCAAT  
 TAGCGCTAGCGGCTGCTGATGAATCATCGATACTGGAAAACTTGGATATTCAGGAGCACGCTTACTTCTT  
 CGCTATTACGGATACGGTCCGAAAGATTTCGGATCCACAGGACACTTGCACTTACAGCTCTAGGTAG

# Effective siRNA region of the Phospholipase-D gene used for dsRNA construct

AACCGAAGCGGATTTATCCGATGGAACGGACATCAAAGTCCGGCAGCCTCTCCTTAAAGCAACAGACTGGTTC  
 CTCACCGAAAAGGAAATCACCGATTGCGAGGCGGCATCCACGCAGCGATTTAGCGGCCTACACGACAGGC  
 AACGCGGTGACATCCTTCACAGTTACGAAAGATTTCTACGACTCGGTTTACGAGGACCTGACAAAGACGAAG  
 GAAGGAGATCGAGTACTACTTTGCGGTACGCTACAGCCCTGATCCATTAAACCGGATATCGACCCTACAG  
 GCGCTACGACAGGAGTTGGCAAAGTGCTACGGATGTTGTGAAGCGCGGAGGTAATATCAACATCCTCAACT  
 GGCAGAATCTGAAGTACAGATACTTCAATCTCAAGGCTCGCGATGCTATCAACGCCATTCCAGTATCTCCAATA  
 AATGGGGCCAAAGCAGTTCTTCTGTTGACGACCGCCTCCCGACTATGGTGTCTTACCACCAGAAAACATAT  
 GGTATCTTGTCCGACAACGCCTCAGGTAGTGAGGAGCAGCCAGTGGCTTACG

CLUSTAL O(1.2.4) multiple sequence alignment of HP0823 *Phytophthora infestans* isolate with the reference sequence

|      |                                                                        |
|------|------------------------------------------------------------------------|
| PITG | -----CCGATGATACCCCGCAACCGAA                                            |
| HP08 | CGGTAACCTGGATCTCGTCGATGCGAGCTCTGCCGTGCCGATGATACCCCGCAACCGAA<br>*****   |
| PITG | GCGGATTTATCCGATGGAACGGACATCAAAGTCCGGCAGCCTCTCCTTAAAGCAACAGAC           |
| HP08 | GCGGATTTATCCGATGGAACGGACATCAAAGTCCGGCAGCCTCTCCTTAAAGCAACAGAC<br>*****  |
| PITG | TGGTTCCTCACCGAAAAGGAAATCACCGATTTCGCGAGGCGGCATCCACGCAGCGATTTA           |
| HP08 | TGGTTCCTCACCGAAAAGGAAATCACCGATTTCGCGAGGCGGCATCCACGCAGCGATTTA<br>*****  |
| PITG | GCGGCCTACACGACAGGCAACGCGGTGACATCCTTCACAGTTACGAAAGATTTCTACGAC           |
| HP08 | GCGGCCTACACGACAGGCAACGCGGTGACATCCTTCACAGTTACGAAAGATTTCTACGAC<br>*****  |
| PITG | TCGGTTTACGAGGACCTGACAAAGACGAAGGAAGGAGATCGAGTACTACTTTCGGCGTAC           |
| HP08 | TCGGTTTACGAGGACCTGACAAAGACGAAGGAAGGAGATCGAGTACTACTTTCGGCGTAC<br>*****  |
| PITG | GCTACAGCCCTGATCCCATTTAAACCGGATATCGACCCTACAGGCGCTACGACAGGAGTT           |
| HP08 | GCTACAGCCCTGATCCCATTTAAACCGGATATCGACCCTACAGGCGCTACGACAGGAGTT<br>*****  |
| PITG | GGCAAAGTGCTCACGGATGTTGTGAAGCGCGGAGGTAATATCAACATCCTCAACTGGCAG           |
| HP08 | GGCAAAGTGCTCACGGATGTTGTGAAGCGCGGAGGTAATATCAACATCCTCAACTGCCAG<br>*****  |
| PITG | AATCTGAAGTACAGATACTTCAATCTCAAGGCTCGCGATGCTATCAACGCCATTCCAGTA           |
| HP08 | AATCTGAAGTACAGATACTTCAATCTCAAGGCTCGCGATGCTATCAACGCCATTCCAGTA<br>*****  |
| PITG | TCTCCAATAAATGGGGCCAAAGCAGTTCTTCTGTTTCGACGACCGCCTCCCGACTATGGTG          |
| HP08 | TCTCCAATAAATGGGGCCAAAGCAGTTCTTCTGTTTCGACGACCGCCTCCCGACTATGGTG<br>***** |
| PITG | TCGTCTTACCACCAGAAAACATATGGTTATCTTGTCCGACAACGCCTCAGGTAGTGAGGAG          |
| HP08 | TCGTCTTACCACCAGAAAACATATGGTTATCTTGTCCGACAACGCCTCAGGTAGTGAGGAG<br>***** |

```
PITG      CAGCCAGTGGCTTACGTGGGTGG-----
HP08      CAGCCAGTGGCTTACGTGGGTGGCGATGACCGGTAACCAATTCGCCCTATAGTGAGTCGT
          *****
```
