# Supplementary material for: Spraying of dsRNA Molecules Derived from Phytophthora Infestans, as a Plant Protection Strategies for the Management of Potato Late Blight
Source: Preprints.org preprint supplement (doi:10.20944/preprints202102.0280.v1), 2021-02-11
Supplement: Supplementary file 2 [file supplementary]

**Table S1: Efficacy of dsRNA against *P.infestans* using detached leaf assay**

| dsRNA treatment<br>(250 ng/ul)             | LA<br>(cm <sup>2</sup> ) | Sporulation<br>(X10 <sup>3</sup> ) | Disease<br>Reaction |
|--------------------------------------------|--------------------------|------------------------------------|---------------------|
| dsRNA SDH                                  | 2.4                      | 2                                  | Resistant           |
| dsRNA EF-1 $\alpha$                        | 2.5                      | 3                                  | Resistant           |
| dsRNA Hsp90                                | 2.3                      | 2                                  | Resistant           |
| dsRNA SDH+ EF-1 $\alpha$ +Hsp90 (150ng/ul) | 0.8                      | 1                                  | Highly<br>Resistant |
| Control                                    | 7.5                      | 7.1                                | Susceptible         |

**Table S2: Efficacy of dsRNA (GPI-HAM34 and PLD-3 gene) against *P.infestans* with and without nano clay particle using detached leaf assay**

| dsRNA (200 ng/ul)/ treatment                              | LA<br>(cm <sup>2</sup> ) | Sporulation<br>(x10 <sup>3</sup> ) | Disease<br>Reaction     |
|-----------------------------------------------------------|--------------------------|------------------------------------|-------------------------|
| <b>dsRNA</b>                                              |                          |                                    |                         |
| dsRNA GPI-HAM34                                           | 2.5                      | 2                                  | Resistant               |
| dsRNA PLD-3                                               | 2.7                      | 3                                  | Moderately<br>Resistant |
| dsRNA GPI-HAM34+PLD-3                                     | 0.5                      | 0                                  | Highly<br>Resistant     |
| Control                                                   | 7.8                      | 8.5                                | Susceptible             |
| <b>dsRNA with Nano clay particles</b>                     |                          |                                    |                         |
| 5 PPM of nano clay + 100ng/ul of GPI-HAM34,<br>PLD-3 each | 1.2                      | 1                                  | Resistant               |
| 10 PPM of nano clay + 100ng/ul of GPI-HAM34,<br>PLD-3     | 0.2                      | 0                                  | Highly<br>Resistant     |
| 20 PPM of nano clay + 100ng/ul of GPI-HAM34,<br>PLD-3     | 0.8                      | 1                                  | Resistant               |
| Control                                                   | 5.6                      | 4.8                                | Susceptible             |

**Table S3. Whole plant assay: dsRNA Nano clay spray against *P.infestans* sporulation**

| dsRNA-Nano clay formulation (1%) | Sporulation<br>(X10 <sup>3</sup> ) | Disease Reaction |
|----------------------------------|------------------------------------|------------------|
|                                  |                                    |                  |
| dsRNA                            | 4                                  | Resistant        |
| Nano clay dsRNA                  | 1                                  | Highly Resistant |
| Control                          | 12.5                               | Susceptible      |

**Table S4: Whole plant assay: dsRNA Nano clay formulation against late blight disease severity (%)**

| <b>dsRNA-Nano clay formulation (1%)</b> | <b>Disease severity (%)</b> | <b>Disease Reaction</b> |
|-----------------------------------------|-----------------------------|-------------------------|
| dsRNA                                   | 23.6                        | Resistant               |
| Nano clay dsRNA                         | 4                           | Highly Resistant        |
| Control                                 | 73.3                        | Susceptible             |
