# Supplementary material for: Spraying of dsRNA Molecules Derived from Phytophthora Infestans, as a Plant Protection Strategies for the Management of Potato Late Blight
Source: Preprints.org preprint supplement (doi:10.20944/preprints202102.0280.v1), 2021-02-11
Supplement: Supplementary file 3 [file supplementary]

10 fold mycelium vs sporangium

| SEQ_ID     | DESCRIPTIO | Mycelium | Sporangiur | Fold change |
|------------|------------|----------|------------|-------------|
| PITG_12551 |            | 8.59442  | 14.21405   | 49.16751    |
| PITG_12556 |            | 8.70743  | 13.94198   | 37.64927    |
| PITG_16999 |            | 8.43902  | 13.65272   | 37.10907    |
| PITG_06202 |            | 8.89462  | 13.44095   | 23.36591    |
| PITG_11060 |            | 9.39722  | 13.51552   | 17.36728    |
| PITG_03742 |            | 8.58947  | 12.6397    | 16.56692    |
| PITG_10765 |            | 9.5479   | 13.48678   | 15.33635    |
| PITG_02501 |            | 9.54883  | 13.48195   | 15.27517    |
| PITG_13660 |            | 8.98762  | 12.91893   | 15.25613    |
| PITG_00840 |            | 8.70857  | 12.61527   | 14.99802    |
| PITG_03637 |            | 10.00708 | 13.9069    | 14.92663    |
| PITG_12562 |            | 9.3965   | 13.27382   | 14.69564    |
| PITG_22317 |            | 9.38495  | 13.25422   | 14.61387    |
| PITG_00127 |            | 8.6794   | 12.51402   | 14.26707    |
| PITG_02139 |            | 8.99817  | 12.77543   | 13.71105    |
| PITG_14950 |            | 8.93755  | 12.67513   | 13.33904    |
| PITG_14721 |            | 9.30312  | 13.01768   | 13.12792    |
| PITG_08659 |            | 9.36217  | 13.01568   | 12.58398    |
| PITG_09370 |            | 8.60375  | 12.25507   | 12.56481    |
| PITG_20344 |            | 8.22698  | 11.8772    | 12.55523    |
| PITG_15731 |            | 8.94282  | 12.58678   | 12.50096    |
| PITG_00384 |            | 9.06653  | 12.69478   | 12.36551    |
| PITG_16731 |            | 10.02318 | 13.61598   | 12.06537    |
| PITG_23156 |            | 8.29853  | 11.88438   | 12.00738    |
| PITG_02954 |            | 8.59923  | 12.1364    | 11.60896    |
| PITG_16715 |            | 8.8556   | 12.3903    | 11.58913    |
| PITG_07482 |            | 8.7879   | 12.29713   | 11.38635    |
| PITG_00833 |            | 8.53502  | 12.03052   | 11.27847    |
| PITG_00761 |            | 8.60703  | 12.09303   | 11.20445    |
| PITG_03639 |            | 9.4509   | 12.90753   | 10.97868    |
| PITG_05616 |            | 9.47085  | 12.92202   | 10.93716    |
| PITG_06474 |            | 10.85657 | 14.30362   | 10.906      |
| PITG_03721 |            | 9.37887  | 12.81243   | 10.80455    |
| PITG_12533 |            | 8.85242  | 12.26722   | 10.66491    |
| PITG_14046 |            | 7.84205  | 11.23522   | 10.50618    |
| PITG_11853 |            | 9.07208  | 12.46113   | 10.47625    |
| PITG_06860 |            | 10.66112 | 14.04915   | 10.46887    |
| PITG_21410 |            | 9.34402  | 12.72472   | 10.41579    |
| PITG_09065 |            | 8.56708  | 11.93053   | 10.29199    |
| PITG_06032 |            | 9.1032   | 12.46512   | 10.28106    |
| PITG_07347 |            | 9.22832  | 12.56877   | 10.12921    |
| PITG_10750 |            | 9.28905  | 12.61378   | 10.01946    |
| PITG_16275 |            | 8.43388  | 11.75842   | 10.01807    |
