# Supplementary material for: Spraying of dsRNA Molecules Derived from Phytophthora Infestans, as a Plant Protection Strategies for the Management of Potato Late Blight
Source: Preprints.org preprint supplement (doi:10.20944/preprints202102.0280.v1), 2021-02-11
Supplement: Supplementary file 4 [file supplementary]

2 fold mycelium vs zoospores

| SEQ_ID     | DESCRIPTIO | Fold chang | Mycelium | Zoospores |
|------------|------------|------------|----------|-----------|
| PITG_08178 |            | 46.34526   | 8.30348  | 13.83783  |
| PITG_15388 |            | 37.07865   | 8.71012  | 13.92263  |
| PITG_13496 |            | 32.85027   | 9.07547  | 14.1133   |
| PITG_13396 |            | 31.69537   | 8.3294   | 13.3156   |
| PITG_13576 |            | 30.65818   | 9.67195  | 14.61015  |
| PITG_07409 |            | 30.49533   | 8.39565  | 13.32617  |
| PITG_04125 |            | 30.30044   | 8.994    | 13.91527  |
| PITG_12139 |            | 30.22841   | 8.54627  | 13.4641   |
| PITG_18337 |            | 30.14785   | 9.09563  | 14.00962  |
| PITG_15419 |            | 29.98738   | 8.80005  | 13.70633  |
| PITG_22973 |            | 27.68182   | 8.77578  | 13.56665  |
| PITG_07390 |            | 27.37936   | 8.84832  | 13.62333  |
| PITG_13755 |            | 25.72739   | 9.31608  | 14.00132  |
| PITG_07445 |            | 24.82032   | 8.81742  | 13.45087  |
| PITG_07833 |            | 24.42946   | 8.67783  | 13.28838  |
| PITG_01289 |            | 24.19326   | 8.29162  | 12.88815  |
| PITG_06370 |            | 23.55536   | 8.91752  | 13.4755   |
| PITG_18396 |            | 22.24357   | 8.88305  | 13.35837  |
| PITG_15659 |            | 21.84831   | 8.93183  | 13.38128  |
| PITG_00431 |            | 21.46157   | 8.78172  | 13.2054   |
| PITG_20344 |            | 21.2575    | 8.22698  | 12.63688  |
| PITG_16953 |            | 21.04516   | 8.80578  | 13.2012   |
| PITG_22343 |            | 20.95104   | 8.39317  | 12.78212  |
| PITG_07919 |            | 20.91452   | 9.50303  | 13.88947  |
| PITG_09851 |            | 20.7643    | 8.48328  | 12.85932  |
| PITG_09169 |            | 20.72883   | 8.4209   | 12.79447  |
| PITG_13712 |            | 20.41466   | 9.50615  | 13.85768  |
| PITG_04378 |            | 20.24789   | 8.9599   | 13.2996   |
| PITG_05362 |            | 20.02782   | 9.02237  | 13.3463   |
| PITG_02000 |            | 19.98414   | 9.08958  | 13.41037  |
| PITG_18119 |            | 19.79412   | 8.44733  | 12.75433  |
| PITG_00375 |            | 19.70446   | 9.54355  | 13.844    |
| PITG_04949 |            | 19.12229   | 8.63722  | 12.8944   |
| PITG_22117 |            | 18.76493   | 8.23782  | 12.46778  |
| PITG_06788 |            | 18.62067   | 9.06598  | 13.28482  |
| PITG_03448 |            | 18.44234   | 9.65625  | 13.8612   |
| PITG_22378 |            | 18.2343    | 9.17643  | 13.36502  |
| PITG_07550 |            | 18.05404   | 9.66045  | 13.8347   |
| PITG_13373 |            | 17.92064   | 9.91092  | 14.07447  |
| PITG_13644 |            | 17.7525    | 8.90603  | 13.05598  |
| PITG_17289 |            | 17.72626   | 8.67912  | 12.82693  |
| PITG_02586 |            | 17.65596   | 9.74972  | 13.8918   |
| PITG_10750 |            | 17.42093   | 9.28905  | 13.4118   |
| PITG_11891 |            | 17.13748   | 9.09835  | 13.19743  |
| PITG_16956 |            | 17.10149   | 8.8471   | 12.94315  |

|            |          |          |          |
|------------|----------|----------|----------|
| PITG_07960 | 17.02992 | 9.61218  | 13.70218 |
| PITG_21945 | 16.34016 | 8.8202   | 12.85055 |
| PITG_22562 | 16.29887 | 9.06578  | 13.09248 |
| PITG_07381 | 16.06909 | 8.87718  | 12.8834  |
| PITG_04693 | 16.02294 | 9.3009   | 13.30297 |
| PITG_07836 | 15.95515 | 8.20137  | 12.19732 |
| PITG_18284 | 15.87865 | 9.49922  | 13.48823 |
| PITG_20537 | 15.8049  | 9.85063  | 13.83293 |
| PITG_18386 | 15.70588 | 8.78203  | 12.75527 |
| PITG_14492 | 15.70117 | 8.86873  | 12.84153 |
| PITG_19245 | 15.51706 | 8.67972  | 12.6355  |
| PITG_09218 | 15.497   | 9.50202  | 13.45593 |
| PITG_02501 | 15.36526 | 9.54883  | 13.49043 |
| PITG_09979 | 15.30644 | 9.01008  | 12.94615 |
| PITG_07143 | 15.1399  | 8.32955  | 12.24983 |
| PITG_11936 | 15.09885 | 8.4785   | 12.39487 |
| PITG_03115 | 14.5198  | 9.57592  | 13.43587 |
| PITG_05734 | 14.495   | 8.80025  | 12.65773 |
| PITG_12496 | 14.45603 | 9.2221   | 13.0757  |
| PITG_15170 | 14.28224 | 8.10668  | 11.94283 |
| PITG_11942 | 14.25965 | 9.06255  | 12.89642 |
| PITG_03803 | 14.06691 | 9.39747  | 13.2117  |
| PITG_02058 | 14.03315 | 8.11967  | 11.93043 |
| PITG_00805 | 13.97604 | 8.64538  | 12.45027 |
| PITG_05729 | 13.82109 | 8.59015  | 12.37895 |
| PITG_09370 | 13.80689 | 8.60375  | 12.39107 |
| PITG_11951 | 13.67419 | 8.8622   | 12.63558 |
| PITG_00056 | 13.26773 | 10.22372 | 13.95357 |
| PITG_14003 | 13.26635 | 8.77965  | 12.50935 |
| PITG_13157 | 13.11519 | 9.78265  | 13.49582 |
| PITG_14413 | 12.97773 | 9.36653  | 13.0645  |
| PITG_06591 | 12.91566 | 8.96977  | 12.66082 |
| PITG_06087 | 12.80898 | 8.34827  | 12.02735 |
| PITG_09832 | 12.54537 | 10.34407 | 13.99315 |
| PITG_08232 | 12.4347  | 9.26007  | 12.89637 |
| PITG_04967 | 12.42078 | 9.2038   | 12.83848 |
| PITG_06805 | 12.36037 | 8.69283  | 12.32048 |
| PITG_04947 | 12.35594 | 8.40535  | 12.03248 |
| PITG_21388 | 12.35423 | 8.53712  | 12.16405 |
| PITG_05714 | 12.29898 | 8.62542  | 12.24588 |
| PITG_17848 | 12.28052 | 9.47897  | 13.09727 |
| PITG_06016 | 12.25105 | 9.82528  | 13.44012 |
| PITG_10768 | 12.19964 | 9.24045  | 12.84922 |
| PITG_05156 | 12.15603 | 10.28445 | 13.88805 |
| PITG_11282 | 12.05896 | 9.49152  | 13.08355 |
| PITG_05079 | 12.02988 | 10.3589  | 13.94745 |
| PITG_22324 | 11.97165 | 8.755    | 12.33655 |

|            |          |          |          |
|------------|----------|----------|----------|
| PITG_11548 | 11.96709 | 9.18992  | 12.77092 |
| PITG_07898 | 11.95437 | 10.15828 | 13.73775 |
| PITG_00894 | 11.80288 | 9.41192  | 12.97298 |
| PITG_14047 | 11.79974 | 10.93928 | 14.49997 |
| PITG_16204 | 11.79579 | 9.75425  | 13.31445 |
| PITG_07410 | 11.77061 | 10.0195  | 13.57662 |
| PITG_10686 | 11.75661 | 8.94933  | 12.50473 |
| PITG_09356 | 11.7158  | 9.33058  | 12.88097 |
| PITG_04977 | 11.68066 | 10.66325 | 14.2093  |
| PITG_23131 | 11.6099  | 9.146    | 12.68328 |
| PITG_16500 | 11.51612 | 8.48123  | 12.00682 |
| PITG_04270 | 11.28134 | 9.23103  | 12.7269  |
| PITG_16321 | 11.24413 | 9.96323  | 13.45433 |
| PITG_18393 | 11.24244 | 9.2206   | 12.71148 |
| PITG_11484 | 11.23504 | 8.5451   | 12.03503 |
| PITG_12832 | 11.21922 | 8.4882   | 11.9761  |
| PITG_14360 | 11.206   | 8.66265  | 12.14885 |
| PITG_09941 | 11.17149 | 9.7464   | 13.22815 |
| PITG_23077 | 11.15267 | 9.1682   | 12.64752 |
| PITG_08955 | 11.14829 | 8.91128  | 12.39003 |
| PITG_17842 | 11.11613 | 8.57763  | 12.05222 |
| PITG_13495 | 11.09625 | 10.71708 | 14.18908 |
| PITG_09386 | 11.05058 | 9.55757  | 13.02362 |
| PITG_04970 | 11.01655 | 8.5788   | 12.0404  |
| PITG_10702 | 10.91646 | 8.80973  | 12.25817 |
| PITG_18117 | 10.90499 | 8.94458  | 12.3915  |
| PITG_08089 | 10.79132 | 9.60203  | 13.03383 |
| PITG_12666 | 10.78098 | 8.65907  | 12.08948 |
| PITG_23076 | 10.74728 | 9.52785  | 12.95375 |
| PITG_05523 | 10.73959 | 9.56662  | 12.99148 |
| PITG_05750 | 10.7127  | 8.72113  | 12.14238 |
| PITG_21869 | 10.64891 | 8.51173  | 11.92437 |
| PITG_08946 | 10.60042 | 8.63685  | 12.0429  |
| PITG_08213 | 10.56338 | 10.36358 | 13.76458 |
| PITG_13852 | 10.56228 | 9.42543  | 12.82628 |
| PITG_08926 | 10.54266 | 10.3183  | 13.71647 |
| PITG_22001 | 10.48109 | 9.2054   | 12.59512 |
| PITG_13381 | 10.47806 | 9.80047  | 13.18977 |
| PITG_21718 | 10.47492 | 9.12483  | 12.5137  |
| PITG_18174 | 10.454   | 10.586   | 13.97198 |
| PITG_19966 | 10.42578 | 8.71628  | 12.09837 |
| PITG_10727 | 10.42193 | 10.58708 | 13.96863 |
| PITG_03034 | 10.39007 | 10.55802 | 13.93515 |
| PITG_21277 | 10.31687 | 9.84637  | 13.2133  |
| PITG_03223 | 10.21865 | 10.16902 | 13.52215 |
| PITG_04123 | 10.21016 | 9.0251   | 12.37703 |
| PITG_01240 | 10.19389 | 10.039   | 13.38863 |

|            |          |          |          |
|------------|----------|----------|----------|
| PITG_09845 | 10.15898 | 9.50362  | 12.8483  |
| PITG_10275 | 10.14865 | 9.84528  | 13.1885  |
| PITG_06254 | 10.10829 | 9.48298  | 12.82045 |
| PITG_00322 | 10.08752 | 8.96967  | 12.30417 |
| PITG_07968 | 10.05611 | 9.40803  | 12.73803 |
| PITG_07664 | 9.912164 | 10.51113 | 13.82033 |
| PITG_05799 | 9.876159 | 8.45683  | 11.76078 |
| PITG_20230 | 9.840511 | 9.83138  | 13.13012 |
| PITG_15649 | 9.814286 | 8.72938  | 12.02427 |
| PITG_09173 | 9.615643 | 8.93752  | 12.2029  |
| PITG_22133 | 9.60088  | 11.03962 | 14.30278 |
| PITG_10037 | 9.569875 | 8.88802  | 12.14652 |
| PITG_01366 | 9.56689  | 10.14662 | 13.40467 |
| PITG_14802 | 9.521904 | 8.83763  | 12.08888 |
| PITG_06401 | 9.466405 | 9.36697  | 12.60978 |
| PITG_02964 | 9.422871 | 8.9852   | 12.22137 |
| PITG_10410 | 9.4046   | 8.24632  | 11.47968 |
| PITG_07899 | 9.348166 | 9.4674   | 12.69208 |
| PITG_02332 | 9.338236 | 9.86808  | 13.09123 |
| PITG_00328 | 9.319268 | 9.4471   | 12.66732 |
| PITG_14141 | 9.271268 | 10.31455 | 13.52732 |
| PITG_07415 | 9.235991 | 9.15645  | 12.36372 |
| PITG_08929 | 9.209354 | 8.62252  | 11.82562 |
| PITG_11058 | 9.147009 | 8.87772  | 12.07102 |
| PITG_00999 | 9.109888 | 8.901    | 12.08843 |
| PITG_01482 | 9.097898 | 8.91238  | 12.09792 |
| PITG_20615 | 9.089914 | 9.93833  | 13.1226  |
| PITG_13376 | 9.082356 | 8.22643  | 11.4095  |
| PITG_07391 | 9.036412 | 9.55743  | 12.73318 |
| PITG_03381 | 9.016912 | 9.1143   | 12.28693 |
| PITG_16536 | 9.00879  | 10.71513 | 13.88647 |
| PITG_03346 | 8.949352 | 10.7778  | 13.93958 |
| PITG_15195 | 8.89935  | 11.51485 | 14.66855 |
| PITG_08455 | 8.832876 | 8.80405  | 11.94693 |
| PITG_13655 | 8.821965 | 10.75172 | 13.89282 |
| PITG_20881 | 8.801097 | 8.44403  | 11.58172 |
| PITG_19552 | 8.801097 | 8.96457  | 12.10225 |
| PITG_13853 | 8.767406 | 11.03283 | 14.16498 |
| PITG_02230 | 8.724464 | 10.01453 | 13.1396  |
| PITG_06345 | 8.708052 | 9.8459   | 12.96825 |
| PITG_01659 | 8.699203 | 8.5152   | 11.63608 |
| PITG_08888 | 8.677022 | 8.80067  | 11.91787 |
| PITG_08233 | 8.674115 | 9.85043  | 12.96715 |
| PITG_01335 | 8.672813 | 10.21973 | 13.33623 |
| PITG_21481 | 8.636819 | 8.56735  | 11.67785 |
| PITG_13374 | 8.606639 | 8.84023  | 11.94568 |
| PITG_23179 | 8.53525  | 8.59268  | 11.68612 |

|            |          |          |          |
|------------|----------|----------|----------|
| PITG_10238 | 8.515355 | 9.49205  | 12.58212 |
| PITG_15006 | 8.512699 | 9.21562  | 12.30523 |
| PITG_15980 | 8.496587 | 9.22368  | 12.31057 |
| PITG_05339 | 8.489424 | 9.81035  | 12.89602 |
| PITG_05966 | 8.482953 | 8.4442   | 11.52877 |
| PITG_23129 | 8.453214 | 9.1326   | 12.2121  |
| PITG_19649 | 8.419104 | 9.72672  | 12.80038 |
| PITG_12129 | 8.333947 | 8.63522  | 11.69422 |
| PITG_03748 | 8.305306 | 8.83562  | 11.88965 |
| PITG_03151 | 8.241746 | 9.33878  | 12.38173 |
| PITG_19108 | 8.239461 | 8.87557  | 11.91812 |
| PITG_09377 | 8.163757 | 9.28492  | 12.31415 |
| PITG_15847 | 8.153955 | 9.39192  | 12.41942 |
| PITG_02050 | 8.146235 | 10.64818 | 13.67432 |
| PITG_16003 | 8.114394 | 9.64483  | 12.66532 |
| PITG_00659 | 8.082025 | 9.41993  | 12.43465 |
| PITG_10694 | 8.077917 | 9.25648  | 12.27047 |
| PITG_13171 | 8.063279 | 10.63592 | 13.64728 |
| PITG_21025 | 8.04244  | 8.3177   | 11.32533 |
| PITG_14916 | 8.035382 | 8.97668  | 11.98305 |
| PITG_15753 | 8.031299 | 8.75215  | 11.75778 |
| PITG_14518 | 8.001572 | 9.38508  | 12.38537 |
| PITG_15685 | 7.957232 | 8.41592  | 11.40818 |
| PITG_08920 | 7.952545 | 9.97742  | 12.96883 |
| PITG_15239 | 7.95181  | 10.94918 | 13.94047 |
| PITG_11947 | 7.937492 | 9.84878  | 12.83747 |
| PITG_12788 | 7.920638 | 9.07183  | 12.05745 |
| PITG_19279 | 7.894603 | 9.49137  | 12.47223 |
| PITG_06643 | 7.859931 | 8.95928  | 11.9338  |
| PITG_00898 | 7.826768 | 8.98075  | 11.94917 |
| PITG_01131 | 7.817009 | 10.94555 | 13.91217 |
| PITG_13397 | 7.785286 | 9.15057  | 12.11132 |
| PITG_17595 | 7.78052  | 8.23375  | 11.19362 |
| PITG_00539 | 7.762923 | 10.09458 | 13.05118 |
| PITG_03881 | 7.757634 | 9.30403  | 12.25965 |
| PITG_08181 | 7.745992 | 10.26892 | 13.22237 |
| PITG_03347 | 7.645177 | 10.48197 | 13.41652 |
| PITG_11690 | 7.627798 | 9.82158  | 12.75285 |
| PITG_12592 | 7.626653 | 8.44053  | 11.37158 |
| PITG_10012 | 7.542363 | 10.18745 | 13.10247 |
| PITG_20787 | 7.538269 | 9.28733  | 12.20157 |
| PITG_04396 | 7.490784 | 10.44662 | 13.35173 |
| PITG_13883 | 7.487323 | 9.0615   | 11.96595 |
| PITG_07291 | 7.474964 | 9.20468  | 12.10675 |
| PITG_06822 | 7.413903 | 10.62167 | 13.5119  |
| PITG_16135 | 7.410735 | 11.22737 | 14.11698 |
| PITG_13111 | 7.393291 | 9.97963  | 12.86585 |

|            |          |          |          |
|------------|----------|----------|----------|
| PITG_16918 | 7.376058 | 9.97478  | 12.85763 |
| PITG_14251 | 7.373587 | 9.69745  | 12.57982 |
| PITG_21845 | 7.343918 | 9.90868  | 12.78523 |
| PITG_12401 | 7.342391 | 10.71135 | 13.5876  |
| PITG_15688 | 7.336626 | 10.60725 | 13.48237 |
| PITG_20883 | 7.317158 | 10.80935 | 13.68063 |
| PITG_10382 | 7.311834 | 9.85328  | 12.72352 |
| PITG_04184 | 7.299933 | 9.17318  | 12.04107 |
| PITG_09103 | 7.233113 | 9.55993  | 12.41455 |
| PITG_20355 | 7.230941 | 9.949    | 12.80318 |
| PITG_06476 | 7.226682 | 9.1938   | 12.04713 |
| PITG_09175 | 7.216253 | 9.20108  | 12.05233 |
| PITG_14645 | 7.185723 | 9.98827  | 12.8334  |
| PITG_12143 | 7.181573 | 9.24237  | 12.08667 |
| PITG_20855 | 7.175437 | 8.63458  | 11.47765 |
| PITG_06963 | 7.151355 | 9.83142  | 12.66963 |
| PITG_03670 | 7.096134 | 10.82718 | 13.65422 |
| PITG_17573 | 7.075588 | 9.00042  | 11.82327 |
| PITG_06008 | 7.06293  | 9.38812  | 12.20838 |
| PITG_07025 | 7.057546 | 9.08655  | 11.90572 |
| PITG_04618 | 7.056649 | 11.01743 | 13.83642 |
| PITG_18442 | 7.038168 | 8.79517  | 11.61037 |
| PITG_21312 | 7.036705 | 8.48605  | 11.30095 |
| PITG_15049 | 7.023629 | 9.85268  | 12.6649  |
| PITG_04509 | 6.994399 | 9.67948  | 12.48568 |
| PITG_01973 | 6.982531 | 10.29613 | 13.09988 |
| PITG_05740 | 6.951543 | 9.33227  | 12.1296  |
| PITG_08309 | 6.947449 | 9.60198  | 12.39847 |
| PITG_03961 | 6.929014 | 9.3261   | 12.11875 |
| PITG_10485 | 6.913023 | 9.64505  | 12.43437 |
| PITG_00731 | 6.873921 | 10.46712 | 13.24825 |
| PITG_09732 | 6.873365 | 8.95398  | 11.735   |
| PITG_18276 | 6.867254 | 9.92613  | 12.70587 |
| PITG_10772 | 6.856315 | 8.65385  | 11.43128 |
| PITG_21511 | 6.842388 | 9.3244   | 12.0989  |
| PITG_03889 | 6.836462 | 8.40132  | 11.17457 |
| PITG_18331 | 6.823996 | 9.2509   | 12.02152 |
| PITG_00329 | 6.819818 | 9.67293  | 12.44267 |
| PITG_11135 | 6.815486 | 9.2791   | 12.04792 |
| PITG_16696 | 6.812338 | 9.41983  | 12.18798 |
| PITG_20886 | 6.777172 | 10.98405 | 13.74473 |
| PITG_11364 | 6.771537 | 10.34685 | 13.10633 |
| PITG_00921 | 6.760516 | 11.22393 | 13.98107 |
| PITG_05711 | 6.731525 | 8.98753  | 11.73847 |
| PITG_13819 | 6.716999 | 10.43707 | 13.18488 |
| PITG_18923 | 6.69229  | 10.4074  | 13.1499  |
| PITG_17145 | 6.691904 | 10.06865 | 12.81107 |

|            |          |          |          |
|------------|----------|----------|----------|
| PITG_10703 | 6.639387 | 10.4337  | 13.16475 |
| PITG_08706 | 6.63448  | 9.76165  | 12.49163 |
| PITG_06359 | 6.624217 | 9.49253  | 12.22028 |
| PITG_13554 | 6.612137 | 9.15473  | 11.87985 |
| PITG_09296 | 6.56783  | 9.36932  | 12.08473 |
| PITG_11662 | 6.555474 | 9.55782  | 12.27052 |
| PITG_03032 | 6.5411   | 9.85268  | 12.56222 |
| PITG_22431 | 6.52088  | 8.40062  | 11.10568 |
| PITG_20454 | 6.519524 | 8.78458  | 11.48935 |
| PITG_07796 | 6.50245  | 9.15598  | 11.85697 |
| PITG_09643 | 6.489317 | 9.0895   | 11.78757 |
| PITG_08509 | 6.445982 | 10.1173  | 12.8057  |
| PITG_07341 | 6.41204  | 10.91507 | 13.59585 |
| PITG_06013 | 6.401455 | 8.4138   | 11.0922  |
| PITG_15058 | 6.391332 | 9.0557   | 11.73182 |
| PITG_04524 | 6.380709 | 9.61302  | 12.28673 |
| PITG_20843 | 6.373562 | 8.36697  | 11.03907 |
| PITG_11059 | 6.350265 | 8.3778   | 11.04462 |
| PITG_01626 | 6.333048 | 10.22285 | 12.88575 |
| PITG_15072 | 6.304069 | 9.31642  | 11.9727  |
| PITG_05474 | 6.299264 | 8.84298  | 11.49817 |
| PITG_07332 | 6.2989   | 8.42105  | 11.07615 |
| PITG_21893 | 6.296791 | 9.4049   | 12.05952 |
| PITG_18813 | 6.2737   | 8.69552  | 11.34483 |
| PITG_10402 | 6.268195 | 8.97717  | 11.62522 |
| PITG_06101 | 6.264792 | 9.15795  | 11.80522 |
| PITG_04948 | 6.258571 | 8.92462  | 11.57045 |
| PITG_11601 | 6.255969 | 8.52418  | 11.16942 |
| PITG_00629 | 6.247158 | 9.1134   | 11.7566  |
| PITG_07098 | 6.236558 | 10.21495 | 12.8557  |
| PITG_12731 | 6.193837 | 10.3359  | 12.96673 |
| PITG_11755 | 6.188615 | 10.92462 | 13.55423 |
| PITG_13671 | 6.188187 | 9.83317  | 12.46268 |
| PITG_06212 | 6.143028 | 9.18277  | 11.80172 |
| PITG_04307 | 6.136148 | 9.39067  | 12.008   |
| PITG_21770 | 6.131117 | 11.04328 | 13.65943 |
| PITG_06806 | 6.126586 | 11.22402 | 13.8391  |
| PITG_03136 | 6.124039 | 10.24295 | 12.85743 |
| PITG_06236 | 6.122765 | 9.8174   | 12.43158 |
| PITG_20345 | 6.118028 | 8.20845  | 10.82152 |
| PITG_12988 | 6.113294 | 10.0753  | 12.68725 |
| PITG_17832 | 6.103979 | 11.06867 | 13.67842 |
| PITG_11060 | 6.07296  | 9.39722  | 11.99962 |
| PITG_13509 | 6.050062 | 8.88657  | 11.48352 |
| PITG_21687 | 6.04615  | 10.15138 | 12.7474  |
| PITG_12210 | 6.044474 | 11.45327 | 14.04888 |
| PITG_10237 | 6.043566 | 8.73552  | 11.33092 |

|            |          |          |          |
|------------|----------|----------|----------|
| PITG_22265 | 6.025649 | 9.89842  | 12.48953 |
| PITG_16908 | 6.000918 | 8.61712  | 11.2023  |
| PITG_14932 | 5.979328 | 10.5456  | 13.12558 |
| PITG_00806 | 5.975047 | 10.59577 | 13.17472 |
| PITG_10403 | 5.972011 | 9.13402  | 11.71223 |
| PITG_04343 | 5.962359 | 8.90398  | 11.47987 |
| PITG_04490 | 5.962222 | 10.8432  | 13.41905 |
| PITG_00845 | 5.960362 | 10.14923 | 12.72463 |
| PITG_02242 | 5.941594 | 10.53812 | 13.10897 |
| PITG_17127 | 5.917618 | 9.81353  | 12.37855 |
| PITG_02704 | 5.914406 | 9.19302  | 11.75725 |
| PITG_11956 | 5.901438 | 9.04337  | 11.60443 |
| PITG_11475 | 5.892582 | 9.46887  | 12.02777 |
| PITG_07408 | 5.890949 | 9.12757  | 11.68607 |
| PITG_01024 | 5.890881 | 9.42723  | 11.98572 |
| PITG_15745 | 5.869211 | 8.51428  | 11.06745 |
| PITG_08613 | 5.843772 | 11.6191  | 14.166   |
| PITG_11946 | 5.842018 | 9.57275  | 12.11922 |
| PITG_03288 | 5.838779 | 11.1111  | 13.65677 |
| PITG_15884 | 5.811458 | 9.40278  | 11.94168 |
| PITG_12361 | 5.807162 | 11.05982 | 13.59765 |
| PITG_09198 | 5.804748 | 8.9382   | 11.47543 |
| PITG_07085 | 5.802736 | 9.46583  | 12.00257 |
| PITG_14889 | 5.784397 | 9.33968  | 11.87185 |
| PITG_14728 | 5.776584 | 10.26423 | 12.79445 |
| PITG_18763 | 5.770715 | 11.41042 | 13.93917 |
| PITG_21638 | 5.766916 | 9.62353  | 12.15133 |
| PITG_20581 | 5.749952 | 11.41728 | 13.94083 |
| PITG_18314 | 5.714194 | 9.36583  | 11.88038 |
| PITG_05082 | 5.707069 | 9.22538  | 11.73813 |
| PITG_13452 | 5.702851 | 10.54855 | 13.06023 |
| PITG_06903 | 5.700875 | 10.22098 | 12.73217 |
| PITG_22471 | 5.687324 | 10.25393 | 12.76168 |
| PITG_16959 | 5.683187 | 11.8627  | 14.3694  |
| PITG_18005 | 5.67728  | 10.17898 | 12.68418 |
| PITG_05807 | 5.667517 | 11.56105 | 14.06377 |
| PITG_18543 | 5.651759 | 10.3843  | 12.883   |
| PITG_12351 | 5.638064 | 9.93865  | 12.43385 |
| PITG_08707 | 5.607988 | 8.67315  | 11.16063 |
| PITG_14382 | 5.605462 | 9.44652  | 11.93335 |
| PITG_04619 | 5.603909 | 9.33103  | 11.81747 |
| PITG_00070 | 5.603196 | 10.91285 | 13.3991  |
| PITG_09021 | 5.594981 | 8.38977  | 10.8739  |
| PITG_06373 | 5.571439 | 11.21343 | 13.69148 |
| PITG_00807 | 5.564428 | 9.39833  | 11.87457 |
| PITG_05698 | 5.55505  | 9.60602  | 12.07982 |
| PITG_13558 | 5.546393 | 10.25432 | 12.72587 |



|            |          |          |          |
|------------|----------|----------|----------|
| PITG_09384 | 5.529759 | 10.57357 | 13.04078 |
| PITG_09185 | 5.524013 | 8.8939   | 11.35962 |
| PITG_07949 | 5.523694 | 10.0969  | 12.56253 |
| PITG_17591 | 5.520696 | 10.89147 | 13.35632 |
| PITG_01402 | 5.504711 | 9.09435  | 11.55502 |
| PITG_15978 | 5.504583 | 11.61125 | 14.07188 |
| PITG_18428 | 5.481041 | 10.40238 | 12.85683 |
| PITG_13830 | 5.479585 | 9.9129   | 12.36697 |
| PITG_11237 | 5.479142 | 11.19552 | 13.64947 |
| PITG_09181 | 5.475346 | 8.9312   | 11.38415 |
| PITG_19997 | 5.473069 | 10.83757 | 13.28992 |
| PITG_11624 | 5.469403 | 11.07153 | 13.52292 |
| PITG_19859 | 5.461826 | 9.72915  | 12.17853 |
| PITG_00646 | 5.451173 | 9.93443  | 12.381   |
| PITG_09201 | 5.438844 | 9.91485  | 12.35815 |
| PITG_08927 | 5.429427 | 9.97473  | 12.41553 |
| PITG_09298 | 5.426104 | 10.90297 | 13.34288 |
| PITG_05727 | 5.425665 | 10.31015 | 12.74995 |
| PITG_07389 | 5.417147 | 11.96732 | 14.40485 |
| PITG_09853 | 5.39878  | 8.99858  | 11.43122 |
| PITG_07794 | 5.393605 | 11.36995 | 13.8012  |
| PITG_10723 | 5.378175 | 9.58487  | 12.01198 |
| PITG_18999 | 5.360435 | 9.57323  | 11.99558 |
| PITG_15490 | 5.35437  | 10.36203 | 12.78275 |
| PITG_16033 | 5.345902 | 11.44207 | 13.8605  |
| PITG_04935 | 5.339976 | 9.4203   | 11.83713 |
| PITG_06936 | 5.338681 | 10.46853 | 12.88502 |
| PITG_14965 | 5.336276 | 11.07723 | 13.49307 |
| PITG_02109 | 5.328884 | 10.52207 | 12.9359  |
| PITG_18025 | 5.315726 | 10.33733 | 12.7476  |
| PITG_06227 | 5.315725 | 10.14547 | 12.55573 |
| PITG_14954 | 5.305971 | 11.301   | 13.70862 |
| PITG_08205 | 5.303825 | 9.18668  | 11.59372 |
| PITG_22566 | 5.30211  | 9.00578  | 11.41235 |
| PITG_20091 | 5.284255 | 9.1713   | 11.573   |
| PITG_22532 | 5.277666 | 8.63477  | 11.03467 |
| PITG_07045 | 5.25728  | 10.08795 | 12.48227 |
| PITG_12422 | 5.247148 | 11.16413 | 13.55567 |
| PITG_10833 | 5.243754 | 9.4202   | 11.8108  |
| PITG_03960 | 5.234796 | 9.08215  | 11.47028 |
| PITG_00546 | 5.226638 | 9.88283  | 12.26872 |
| PITG_15374 | 5.209759 | 9.49313  | 11.87435 |
| PITG_10408 | 5.196835 | 10.26975 | 12.64738 |
| PITG_16712 | 5.194974 | 11.49578 | 13.8729  |
| PITG_15060 | 5.188916 | 11.14698 | 13.52242 |
| PITG_20102 | 5.174251 | 8.73853  | 11.10988 |
| PITG_20582 | 5.161952 | 11.24803 | 13.61595 |

|            |          |          |          |
|------------|----------|----------|----------|
| PITG_03334 | 5.157183 | 9.61162  | 11.9782  |
| PITG_04104 | 5.152003 | 9.88337  | 12.2485  |
| PITG_15420 | 5.14766  | 9.4853   | 11.84922 |
| PITG_15674 | 5.146471 | 8.22722  | 10.5908  |
| PITG_10824 | 5.127836 | 9.7967   | 12.15505 |
| PITG_04441 | 5.127717 | 9.68063  | 12.03895 |
| PITG_17063 | 5.122921 | 9.50885  | 11.86582 |
| PITG_10186 | 5.116592 | 8.34038  | 10.69557 |
| PITG_09035 | 5.113165 | 8.3232   | 10.67742 |
| PITG_07861 | 5.101483 | 10.45923 | 12.81015 |
| PITG_00348 | 5.094651 | 11.25415 | 13.60313 |
| PITG_03937 | 5.093533 | 9.39048  | 11.73915 |
| PITG_04336 | 5.092356 | 8.9198   | 11.26813 |
| PITG_02562 | 5.08871  | 9.93327  | 12.28057 |
| PITG_16480 | 5.088181 | 10.51937 | 12.86652 |
| PITG_10013 | 5.081954 | 8.5985   | 10.94388 |
| PITG_07657 | 5.072217 | 9.41142  | 11.75403 |
| PITG_03882 | 5.069113 | 9.4091   | 11.75083 |
| PITG_10064 | 5.065015 | 11.27683 | 13.6174  |
| PITG_06000 | 5.061272 | 9.67133  | 12.01083 |
| PITG_03008 | 5.053385 | 10.21932 | 12.55657 |
| PITG_08610 | 5.046093 | 10.23468 | 12.56985 |
| PITG_22757 | 5.041548 | 8.81038  | 11.14425 |
| PITG_04342 | 5.031365 | 11.43948 | 13.77043 |
| PITG_00821 | 5.029099 | 11.13082 | 13.46112 |
| PITG_14955 | 5.027298 | 11.40782 | 13.7376  |
| PITG_05075 | 5.013495 | 10.00447 | 12.33028 |
| PITG_03154 | 5.007822 | 10.0699  | 12.39408 |
| PITG_21255 | 5.003601 | 9.3853   | 11.70827 |
| PITG_04124 | 4.99638  | 9.85677  | 12.17765 |
| PITG_07816 | 4.995341 | 9.49608  | 11.81667 |
| PITG_08780 | 4.976737 | 10.20927 | 12.52447 |
| PITG_06835 | 4.972771 | 10.00657 | 12.32062 |
| PITG_23156 | 4.966398 | 8.29853  | 10.61073 |
| PITG_06593 | 4.962842 | 9.22187  | 11.53303 |
| PITG_22881 | 4.960091 | 8.99113  | 11.3015  |
| PITG_16713 | 4.960091 | 8.93188  | 11.24225 |
| PITG_10036 | 4.954765 | 8.91087  | 11.21968 |
| PITG_18854 | 4.954021 | 8.69203  | 11.00063 |
| PITG_10123 | 4.916449 | 8.75977  | 11.05738 |
| PITG_16950 | 4.914348 | 8.75908  | 11.05608 |
| PITG_20088 | 4.892087 | 10.15428 | 12.44473 |
| PITG_14418 | 4.885987 | 9.10538  | 11.39403 |
| PITG_05611 | 4.880571 | 8.33973  | 10.62678 |
| PITG_01985 | 4.872121 | 8.7212   | 11.00575 |
| PITG_06114 | 4.867115 | 10.61067 | 12.89373 |
| PITG_10942 | 4.863686 | 8.56782  | 10.84987 |

|            |          |          |          |
|------------|----------|----------|----------|
| PITG_06925 | 4.861551 | 10.66848 | 12.9499  |
| PITG_08817 | 4.859249 | 10.17432 | 12.45505 |
| PITG_10409 | 4.858632 | 10.01395 | 12.2945  |
| PITG_21727 | 4.84725  | 11.2592  | 13.53637 |
| PITG_21998 | 4.842829 | 8.5159   | 10.79175 |
| PITG_07281 | 4.840088 | 10.2624  | 12.53743 |
| PITG_21877 | 4.833718 | 9.92177  | 12.1949  |
| PITG_08487 | 4.820279 | 10.79392 | 13.06303 |
| PITG_03095 | 4.818163 | 11.58092 | 13.8494  |
| PITG_11171 | 4.813879 | 8.17605  | 10.44325 |
| PITG_16440 | 4.808488 | 9.85855  | 12.12413 |
| PITG_18656 | 4.80338  | 10.79907 | 13.06312 |
| PITG_02260 | 4.802215 | 10.73217 | 12.99587 |
| PITG_08892 | 4.785545 | 8.1417   | 10.40038 |
| PITG_02935 | 4.768052 | 9.2167   | 11.4701  |
| PITG_08974 | 4.75205  | 11.11475 | 13.3633  |
| PITG_02553 | 4.744754 | 10.73333 | 12.97967 |
| PITG_16730 | 4.744645 | 9.36495  | 11.61125 |
| PITG_12779 | 4.743274 | 11.28367 | 13.52955 |
| PITG_02503 | 4.721406 | 10.57007 | 12.80928 |
| PITG_07786 | 4.703767 | 9.62508  | 11.8589  |
| PITG_21213 | 4.703441 | 10.08218 | 12.3159  |
| PITG_21114 | 4.701268 | 10.27115 | 12.5042  |
| PITG_14720 | 4.693833 | 8.75903  | 10.9898  |
| PITG_03116 | 4.685923 | 9.206    | 11.43433 |
| PITG_10801 | 4.682947 | 9.90885  | 12.13627 |
| PITG_13570 | 4.675919 | 9.94075  | 12.166   |
| PITG_00708 | 4.674839 | 11.94302 | 14.16793 |
| PITG_19544 | 4.673273 | 11.27577 | 13.5002  |
| PITG_13375 | 4.672626 | 8.77702  | 11.00125 |
| PITG_03898 | 4.661357 | 10.46732 | 12.68807 |
| PITG_04663 | 4.660603 | 10.84892 | 13.06943 |
| PITG_01238 | 4.65533  | 9.39083  | 11.60972 |
| PITG_22799 | 4.643674 | 9.20745  | 11.42272 |
| PITG_07021 | 4.63767  | 9.71845  | 11.93185 |
| PITG_02686 | 4.630656 | 9.36597  | 11.57718 |
| PITG_10952 | 4.630014 | 11.1185  | 13.32952 |
| PITG_13377 | 4.629747 | 8.3094   | 10.52033 |
| PITG_07008 | 4.626646 | 9.49755  | 11.70752 |
| PITG_07335 | 4.626646 | 10.63065 | 12.84062 |
| PITG_08734 | 4.62547  | 11.30228 | 13.51188 |
| PITG_05465 | 4.623013 | 10.363   | 12.57183 |
| PITG_15393 | 4.612983 | 9.9113   | 12.117   |
| PITG_10687 | 4.605316 | 10.06195 | 12.26525 |
| PITG_11608 | 4.604943 | 10.37995 | 12.58313 |
| PITG_15541 | 4.601487 | 9.72278  | 11.92488 |
| PITG_08197 | 4.596546 | 10.47927 | 12.67982 |

|            |          |          |          |
|------------|----------|----------|----------|
| PITG_20063 | 4.589541 | 8.316    | 10.51435 |
| PITG_04668 | 4.58276  | 10.90323 | 13.09945 |
| PITG_03830 | 4.577469 | 10.46695 | 12.6615  |
| PITG_15746 | 4.568171 | 10.49355 | 12.68517 |
| PITG_05440 | 4.567274 | 9.91503  | 12.10637 |
| PITG_01937 | 4.561579 | 10.18353 | 12.37307 |
| PITG_16679 | 4.559893 | 10.12583 | 12.31483 |
| PITG_06887 | 4.558313 | 9.69312  | 11.88162 |
| PITG_18011 | 4.557892 | 10.04433 | 12.2327  |
| PITG_14674 | 4.551735 | 11.25658 | 13.443   |
| PITG_21021 | 4.54669  | 10.2207  | 12.40552 |
| PITG_14591 | 4.524944 | 10.37713 | 12.55503 |
| PITG_18458 | 4.523376 | 11.81178 | 13.98918 |
| PITG_07717 | 4.518728 | 10.39598 | 12.5719  |
| PITG_15151 | 4.512989 | 11.41955 | 13.59363 |
| PITG_04360 | 4.508873 | 8.61875  | 10.79152 |
| PITG_04161 | 4.508508 | 8.38817  | 10.56082 |
| PITG_07257 | 4.508404 | 9.117    | 11.28962 |
| PITG_01282 | 4.503407 | 11.67587 | 13.84688 |
| PITG_06483 | 4.49535  | 10.03868 | 12.20712 |
| PITG_05187 | 4.491145 | 10.44875 | 12.61583 |
| PITG_06846 | 4.487877 | 9.6057   | 11.77173 |
| PITG_13160 | 4.487618 | 8.92283  | 11.08878 |
| PITG_04599 | 4.463473 | 11.16823 | 13.3264  |
| PITG_15744 | 4.46337  | 8.67263  | 10.83077 |
| PITG_08759 | 4.458371 | 10.4176  | 12.57412 |
| PITG_14656 | 4.45451  | 9.36932  | 11.52458 |
| PITG_14969 | 4.43592  | 9.22187  | 11.3711  |
| PITG_13093 | 4.434127 | 10.15045 | 12.2991  |
| PITG_16076 | 4.427114 | 9.76113  | 11.9075  |
| PITG_10039 | 4.424762 | 8.6631   | 10.8087  |
| PITG_17891 | 4.423229 | 11.08497 | 13.23007 |
| PITG_07579 | 4.414296 | 9.40705  | 11.54923 |
| PITG_13342 | 4.405635 | 10.59932 | 12.73867 |
| PITG_09075 | 4.391356 | 8.85358  | 10.98825 |
| PITG_07741 | 4.390139 | 8.68375  | 10.81802 |
| PITG_11598 | 4.379451 | 9.1074   | 11.23815 |
| PITG_21022 | 4.377175 | 9.65618  | 11.78618 |
| PITG_19713 | 4.365963 | 9.24788  | 11.37418 |
| PITG_00320 | 4.365207 | 9.28822  | 11.41427 |
| PITG_15093 | 4.351863 | 10.59187 | 12.7135  |
| PITG_18057 | 4.333402 | 9.08835  | 11.20385 |
| PITG_02384 | 4.33215  | 9.35112  | 11.4662  |
| PITG_15657 | 4.33205  | 10.67335 | 12.7884  |
| PITG_01152 | 4.330549 | 10.00812 | 12.12267 |
| PITG_13378 | 4.326199 | 10.02047 | 12.13357 |
| PITG_07627 | 4.32415  | 9.35305  | 11.46547 |

|            |          |          |          |
|------------|----------|----------|----------|
| PITG_00083 | 4.319158 | 10.19242 | 12.30317 |
| PITG_09716 | 4.317212 | 9.29013  | 11.40023 |
| PITG_00226 | 4.31437  | 8.86432  | 10.97347 |
| PITG_16084 | 4.312078 | 8.49888  | 10.60727 |
| PITG_11264 | 4.306304 | 8.86085  | 10.9673  |
| PITG_22104 | 4.292545 | 11.79837 | 13.9002  |
| PITG_19140 | 4.283529 | 10.83247 | 12.93127 |
| PITG_00705 | 4.278337 | 9.52593  | 11.62298 |
| PITG_10769 | 4.275916 | 9.49132  | 11.58755 |
| PITG_05816 | 4.2563   | 10.08657 | 12.17617 |
| PITG_21973 | 4.251386 | 8.94452  | 11.03245 |
| PITG_11497 | 4.242996 | 11.03483 | 13.11992 |
| PITG_15387 | 4.241624 | 9.17287  | 11.25748 |
| PITG_19231 | 4.235259 | 9.06662  | 11.14907 |
| PITG_10226 | 4.22861  | 11.6094  | 13.68958 |
| PITG_15071 | 4.223532 | 10.9918  | 13.07025 |
| PITG_16535 | 4.208677 | 11.28547 | 13.35883 |
| PITG_18764 | 4.190435 | 11.84415 | 13.91125 |
| PITG_08730 | 4.188257 | 10.42208 | 12.48843 |
| PITG_06943 | 4.185984 | 9.75082  | 11.81638 |
| PITG_19967 | 4.178784 | 10.16727 | 12.23035 |
| PITG_01802 | 4.176709 | 9.87555  | 11.93792 |
| PITG_08514 | 4.172417 | 11.69568 | 13.75657 |
| PITG_03112 | 4.170441 | 11.41897 | 13.47917 |
| PITG_19436 | 4.162355 | 10.00652 | 12.06392 |
| PITG_06194 | 4.162066 | 11.3723  | 13.4296  |
| PITG_21295 | 4.161489 | 10.91192 | 12.96902 |
| PITG_11525 | 4.155773 | 12.14647 | 14.20158 |
| PITG_04787 | 4.151646 | 9.33827  | 11.39195 |
| PITG_15133 | 4.150734 | 9.75797  | 11.81133 |
| PITG_18998 | 4.149296 | 10.2578  | 12.31067 |
| PITG_08616 | 4.147859 | 8.45517  | 10.50753 |
| PITG_19242 | 4.127257 | 9.9092   | 11.95438 |
| PITG_06769 | 4.125017 | 10.88987 | 12.93427 |
| PITG_01133 | 4.11122  | 9.5829   | 11.62247 |
| PITG_13176 | 4.10377  | 11.02298 | 13.05993 |
| PITG_04861 | 4.103391 | 9.52353  | 11.56035 |
| PITG_15301 | 4.101874 | 9.6388   | 11.67508 |
| PITG_15660 | 4.099127 | 12.17558 | 14.2109  |
| PITG_17332 | 4.09676  | 10.48553 | 12.52002 |
| PITG_02812 | 4.094253 | 8.87592  | 10.90952 |
| PITG_07530 | 4.091604 | 10.84967 | 12.88233 |
| PITG_12479 | 4.089525 | 10.66513 | 12.69707 |
| PITG_00343 | 4.074294 | 10.27583 | 12.30238 |
| PITG_00413 | 4.07307  | 10.97512 | 13.00123 |
| PITG_02393 | 4.072835 | 9.68282  | 11.70885 |
| PITG_18305 | 4.066817 | 8.98455  | 11.00845 |

|            |          |          |          |
|------------|----------|----------|----------|
| PITG_09998 | 4.053028 | 10.2846  | 12.3036  |
| PITG_07287 | 4.047366 | 9.33375  | 11.35073 |
| PITG_01023 | 4.042366 | 8.96337  | 10.97857 |
| PITG_14094 | 4.041479 | 8.96333  | 10.97822 |
| PITG_04113 | 4.037979 | 11.49603 | 13.50967 |
| PITG_07258 | 4.036533 | 9.0655   | 11.07862 |
| PITG_03835 | 4.009114 | 10.20523 | 12.20852 |
| PITG_05410 | 4.006614 | 9.31435  | 11.31673 |
| PITG_10555 | 4.006289 | 9.00997  | 11.01223 |
| PITG_07379 | 4.005595 | 9.44928  | 11.4513  |
| PITG_04269 | 4.004948 | 9.69967  | 11.70145 |
| PITG_03811 | 4.00319  | 9.09855  | 11.0997  |
| PITG_21223 | 4        | 9.65533  | 11.65533 |
| PITG_09790 | 3.999815 | 9.48583  | 11.48577 |
| PITG_10308 | 3.994597 | 9.64592  | 11.64397 |
| PITG_00706 | 3.994505 | 9.9865   | 11.98452 |
| PITG_02830 | 3.99432  | 9.41862  | 11.41657 |
| PITG_17960 | 3.988142 | 9.26485  | 11.26057 |
| PITG_12958 | 3.987635 | 9.47127  | 11.4668  |
| PITG_06088 | 3.986576 | 10.75842 | 12.75357 |
| PITG_02466 | 3.986023 | 8.52357  | 10.51852 |
| PITG_08729 | 3.982939 | 9.2186   | 11.21243 |
| PITG_04477 | 3.981191 | 9.49552  | 11.48872 |
| PITG_05587 | 3.974573 | 11.8095  | 13.8003  |
| PITG_04971 | 3.959496 | 10.20942 | 12.19473 |
| PITG_06901 | 3.957392 | 9.14795  | 11.1325  |
| PITG_12781 | 3.949673 | 12.08898 | 14.07072 |
| PITG_13192 | 3.94835  | 9.22237  | 11.20362 |
| PITG_13209 | 3.944748 | 8.46645  | 10.44638 |
| PITG_19141 | 3.941241 | 10.53695 | 12.5156  |
| PITG_06555 | 3.936418 | 9.41045  | 11.38733 |
| PITG_11671 | 3.936054 | 9.73617  | 11.71292 |
| PITG_09355 | 3.933781 | 10.00283 | 11.97875 |
| PITG_16208 | 3.930056 | 10.9794  | 12.95395 |
| PITG_17950 | 3.926335 | 10.92762 | 12.9008  |
| PITG_13133 | 3.921077 | 10.05485 | 12.0261  |
| PITG_05278 | 3.916731 | 10.69415 | 12.6638  |
| PITG_12131 | 3.916143 | 10.3626  | 12.33203 |
| PITG_07536 | 3.914288 | 8.3768   | 10.34555 |
| PITG_22809 | 3.90548  | 9.8313   | 11.7968  |
| PITG_10328 | 3.892778 | 9.37363  | 11.33443 |
| PITG_08127 | 3.89035  | 8.74897  | 10.70887 |
| PITG_09597 | 3.884871 | 12.08228 | 14.04015 |
| PITG_04680 | 3.884063 | 10.15945 | 12.11702 |
| PITG_15287 | 3.883704 | 9.12028  | 11.07772 |
| PITG_05834 | 3.880027 | 9.36182  | 11.31788 |
| PITG_06968 | 3.878324 | 9.44875  | 11.40418 |

|            |          |          |          |
|------------|----------|----------|----------|
| PITG_07437 | 3.873443 | 10.09757 | 12.05118 |
| PITG_00707 | 3.871341 | 10.18645 | 12.13928 |
| PITG_02241 | 3.869508 | 10.43087 | 12.38302 |
| PITG_07874 | 3.868971 | 10.91657 | 12.86852 |
| PITG_13785 | 3.867095 | 10.1698  | 12.12105 |
| PITG_00762 | 3.859418 | 10.29248 | 12.24087 |
| PITG_06064 | 3.847932 | 8.78912  | 10.7332  |
| PITG_06450 | 3.841891 | 10.34877 | 12.29058 |
| PITG_02765 | 3.840693 | 10.43773 | 12.3791  |
| PITG_05279 | 3.839983 | 9.40243  | 11.34353 |
| PITG_04110 | 3.833556 | 10.20352 | 12.1422  |
| PITG_17368 | 3.826831 | 9.9348   | 11.87095 |
| PITG_06768 | 3.80954  | 10.77362 | 12.70323 |
| PITG_05382 | 3.806856 | 10.28773 | 12.21633 |
| PITG_03054 | 3.802417 | 9.8147   | 11.74162 |
| PITG_10323 | 3.780735 | 10.24732 | 12.16598 |
| PITG_00147 | 3.776719 | 9.275    | 11.19213 |
| PITG_02098 | 3.776544 | 11.28788 | 13.20495 |
| PITG_10375 | 3.775672 | 11.73422 | 13.65095 |
| PITG_13573 | 3.77541  | 11.28293 | 13.19957 |
| PITG_17501 | 3.772663 | 10.10427 | 12.01985 |
| PITG_11424 | 3.77201  | 10.25442 | 12.16975 |
| PITG_06094 | 3.767393 | 9.19087  | 11.10443 |
| PITG_17016 | 3.766958 | 9.35768  | 11.27108 |
| PITG_10701 | 3.759524 | 11.86843 | 13.77898 |
| PITG_12346 | 3.758873 | 10.54712 | 12.45742 |
| PITG_16504 | 3.755661 | 9.11885  | 11.02792 |
| PITG_05709 | 3.752625 | 10.01833 | 11.92623 |
| PITG_07537 | 3.74656  | 8.67242  | 10.57798 |
| PITG_12239 | 3.743575 | 11.14012 | 13.04453 |
| PITG_05083 | 3.741024 | 9.20323  | 11.10667 |
| PITG_06325 | 3.739641 | 11.46242 | 13.36532 |
| PITG_04584 | 3.739253 | 9.98758  | 11.89033 |
| PITG_03826 | 3.735842 | 9.77593  | 11.67737 |
| PITG_07134 | 3.735324 | 10.37315 | 12.27438 |
| PITG_20447 | 3.734806 | 10.5467  | 12.44773 |
| PITG_12782 | 3.726015 | 11.8187  | 13.71633 |
| PITG_12760 | 3.722659 | 10.16922 | 12.06555 |
| PITG_07967 | 3.715484 | 10.51382 | 12.40737 |
| PITG_07582 | 3.714754 | 9.2212   | 11.11447 |
| PITG_00004 | 3.704169 | 8.99362  | 10.88277 |
| PITG_04442 | 3.701474 | 9.00378  | 10.89188 |
| PITG_00474 | 3.701303 | 9.45857  | 11.3466  |
| PITG_11438 | 3.69306  | 8.35192  | 10.23673 |
| PITG_06987 | 3.688498 | 9.18152  | 11.06455 |
| PITG_07009 | 3.687049 | 10.4094  | 12.29187 |
| PITG_10751 | 3.676968 | 8.64495  | 10.52347 |

|            |          |          |          |
|------------|----------|----------|----------|
| PITG_08308 | 3.672596 | 9.45635  | 11.33315 |
| PITG_07303 | 3.671662 | 8.18665  | 10.06308 |
| PITG_16916 | 3.669373 | 12.21053 | 14.08607 |
| PITG_12777 | 3.665601 | 11.97107 | 13.84512 |
| PITG_16183 | 3.663866 | 11.34905 | 13.22242 |
| PITG_13122 | 3.660946 | 11.0374  | 12.90962 |
| PITG_06841 | 3.656677 | 9.8761   | 11.74663 |
| PITG_12796 | 3.656466 | 10.70345 | 12.5739  |
| PITG_00591 | 3.653384 | 10.6433  | 12.51253 |
| PITG_06367 | 3.65157  | 10.66527 | 12.53378 |
| PITG_06880 | 3.644195 | 11.63515 | 13.50075 |
| PITG_03475 | 3.633937 | 10.8514  | 12.71293 |
| PITG_10524 | 3.633139 | 10.80852 | 12.66973 |
| PITG_09216 | 3.627017 | 9.92782  | 11.7866  |
| PITG_12776 | 3.624545 | 12.47138 | 14.32918 |
| PITG_10008 | 3.613216 | 10.88068 | 12.73397 |
| PITG_19107 | 3.611379 | 8.54637  | 10.39892 |
| PITG_16448 | 3.610462 | 10.88513 | 12.73732 |
| PITG_02708 | 3.606876 | 11.11462 | 12.96537 |
| PITG_01052 | 3.595062 | 9.19508  | 11.0411  |
| PITG_13666 | 3.588672 | 10.02878 | 11.87223 |
| PITG_19715 | 3.585067 | 9.68258  | 11.52458 |
| PITG_14478 | 3.579149 | 9.41388  | 11.2535  |
| PITG_13388 | 3.571137 | 10.02665 | 11.86303 |
| PITG_00002 | 3.570889 | 8.90198  | 10.73827 |
| PITG_17105 | 3.57027  | 9.8651   | 11.70113 |
| PITG_05370 | 3.570023 | 8.71302  | 10.54895 |
| PITG_12191 | 3.567838 | 11.12157 | 12.95662 |
| PITG_13791 | 3.56553  | 11.28185 | 13.11597 |
| PITG_00488 | 3.563801 | 10.76117 | 12.59458 |
| PITG_07855 | 3.559398 | 10.80078 | 12.63242 |
| PITG_14238 | 3.558411 | 8.3683   | 10.19953 |
| PITG_05805 | 3.555453 | 10.53015 | 12.36018 |
| PITG_09852 | 3.551922 | 10.22797 | 12.05657 |
| PITG_09899 | 3.549543 | 11.24042 | 13.06805 |
| PITG_14212 | 3.548231 | 9.21297  | 11.04007 |
| PITG_06889 | 3.544831 | 11.45083 | 13.27655 |
| PITG_01878 | 3.53857  | 10.55198 | 12.37515 |
| PITG_04974 | 3.53616  | 8.69768  | 10.51987 |
| PITG_14891 | 3.529466 | 8.22542  | 10.04487 |
| PITG_04447 | 3.528202 | 10.8475  | 12.66643 |
| PITG_19294 | 3.521362 | 10.26195 | 12.07808 |
| PITG_07364 | 3.51945  | 9.26887  | 11.08422 |
| PITG_04820 | 3.517255 | 11.9676  | 13.78205 |
| PITG_21621 | 3.515427 | 9.07943  | 10.89313 |
| PITG_15238 | 3.514696 | 10.90925 | 12.72265 |
| PITG_07860 | 3.513438 | 10.20342 | 12.0163  |



|            |          |          |          |
|------------|----------|----------|----------|
| PITG_12462 | 3.511085 | 11.79315 | 13.60507 |
| PITG_07909 | 3.507962 | 9.55957  | 11.3702  |
| PITG_19247 | 3.506585 | 9.98393  | 11.794   |
| PITG_16991 | 3.505451 | 8.37867  | 10.18827 |
| PITG_02392 | 3.499624 | 9.74125  | 11.54845 |
| PITG_10325 | 3.499018 | 8.47868  | 10.28563 |
| PITG_13609 | 3.481921 | 10.63058 | 12.43047 |
| PITG_03890 | 3.476254 | 10.69977 | 12.4973  |
| PITG_03402 | 3.473684 | 11.13723 | 12.9337  |
| PITG_19794 | 3.470155 | 9.2576   | 11.0526  |
| PITG_09114 | 3.467911 | 10.07418 | 11.86825 |
| PITG_05100 | 3.461786 | 9.52795  | 11.31947 |
| PITG_02584 | 3.461066 | 9.18267  | 10.97388 |
| PITG_16225 | 3.461026 | 10.92425 | 12.71545 |
| PITG_06007 | 3.461026 | 8.67017  | 10.46137 |
| PITG_07361 | 3.460587 | 10.62648 | 12.4175  |
| PITG_16364 | 3.458788 | 10.30913 | 12.0994  |
| PITG_07125 | 3.458309 | 8.25718  | 10.04725 |
| PITG_18186 | 3.457789 | 9.91212  | 11.70197 |
| PITG_07249 | 3.454915 | 9.32735  | 11.116   |
| PITG_15711 | 3.451205 | 10.98693 | 12.77403 |
| PITG_03973 | 3.445986 | 10.04202 | 11.82693 |
| PITG_13281 | 3.440894 | 10.53068 | 12.31347 |
| PITG_15838 | 3.437358 | 9.85803  | 11.63933 |
| PITG_18922 | 3.437239 | 10.82342 | 12.60467 |
| PITG_07573 | 3.431922 | 8.28237  | 10.06138 |
| PITG_03778 | 3.431367 | 11.25388 | 13.03267 |
| PITG_12689 | 3.428791 | 8.83593  | 10.61363 |
| PITG_18118 | 3.423922 | 8.11012  | 9.88577  |
| PITG_06228 | 3.421115 | 9.22538  | 10.99985 |
| PITG_00620 | 3.413141 | 10.60327 | 12.37437 |
| PITG_00778 | 3.412392 | 10.90533 | 12.67612 |
| PITG_12797 | 3.412274 | 11.15875 | 12.92948 |
| PITG_03301 | 3.411722 | 10.94003 | 12.71053 |
| PITG_02002 | 3.407861 | 11.87278 | 13.64165 |
| PITG_15906 | 3.404635 | 10.694   | 12.4615  |
| PITG_05149 | 3.401922 | 11.61147 | 13.37782 |
| PITG_00467 | 3.401686 | 9.66878  | 11.43503 |
| PITG_04388 | 3.401647 | 8.4744   | 10.24063 |
| PITG_03604 | 3.400821 | 9.50827  | 11.27415 |
| PITG_19549 | 3.39984  | 11.88143 | 13.6469  |
| PITG_07985 | 3.39666  | 11.8314  | 13.59552 |
| PITG_07399 | 3.395326 | 9.14208  | 10.90563 |
| PITG_15237 | 3.395012 | 11.04448 | 12.8079  |
| PITG_19548 | 3.386551 | 11.92575 | 13.68557 |
| PITG_10721 | 3.380492 | 8.61932  | 10.37655 |
| PITG_02031 | 3.37936  | 8.93983  | 10.69658 |

|            |          |          |          |
|------------|----------|----------|----------|
| PITG_01729 | 3.37854  | 12.39187 | 14.14827 |
| PITG_18270 | 3.378462 | 9.00838  | 10.76475 |
| PITG_01664 | 3.367124 | 9.95553  | 11.70705 |
| PITG_09251 | 3.366968 | 10.7852  | 12.53665 |
| PITG_11504 | 3.366151 | 8.2741   | 10.0252  |
| PITG_09494 | 3.359741 | 9.54678  | 11.29513 |
| PITG_05081 | 3.359508 | 8.72818  | 10.47643 |
| PITG_09949 | 3.356987 | 9.26097  | 11.00813 |
| PITG_09482 | 3.355358 | 10.61255 | 12.35902 |
| PITG_03066 | 3.349858 | 9.61027  | 11.35437 |
| PITG_22975 | 3.348581 | 12.63437 | 14.37792 |
| PITG_10726 | 3.347228 | 10.52205 | 12.26502 |
| PITG_12343 | 3.343865 | 9.35028  | 11.0918  |
| PITG_11341 | 3.342552 | 11.91483 | 13.65578 |
| PITG_18325 | 3.340545 | 9.20633  | 10.94642 |
| PITG_09854 | 3.33715  | 8.44508  | 10.1837  |
| PITG_00966 | 3.334414 | 9.633    | 11.37043 |
| PITG_13424 | 3.332065 | 9.52115  | 11.25757 |
| PITG_14100 | 3.331873 | 8.86283  | 10.59917 |
| PITG_17705 | 3.324721 | 10.84887 | 12.5821  |
| PITG_17348 | 3.324491 | 11.84952 | 13.58265 |
| PITG_07452 | 3.323224 | 11.40252 | 13.1351  |
| PITG_03966 | 3.32284  | 10.48393 | 12.21635 |
| PITG_01857 | 3.313142 | 9.77542  | 11.50362 |
| PITG_01728 | 3.312989 | 9.39777  | 11.1259  |
| PITG_15336 | 3.31119  | 11.39733 | 13.12468 |
| PITG_01127 | 3.310693 | 11.7709  | 13.49803 |
| PITG_12769 | 3.310158 | 12.5296  | 14.2565  |
| PITG_15142 | 3.303473 | 10.17455 | 11.89853 |
| PITG_14123 | 3.293679 | 8.39717  | 10.11687 |
| PITG_07046 | 3.290637 | 9.78838  | 11.50675 |
| PITG_12213 | 3.28942  | 9.88217  | 11.6     |
| PITG_10371 | 3.289344 | 11.86838 | 13.58618 |
| PITG_06783 | 3.287407 | 11.59662 | 13.31357 |
| PITG_02379 | 3.287369 | 9.81907  | 11.536   |
| PITG_15642 | 3.286192 | 11.1669  | 12.88332 |
| PITG_13314 | 3.285091 | 8.68545  | 10.40138 |
| PITG_05331 | 3.28308  | 10.86867 | 12.58372 |
| PITG_10912 | 3.280578 | 10.88915 | 12.6031  |
| PITG_16808 | 3.279138 | 11.2614  | 12.97472 |
| PITG_09067 | 3.278078 | 9.28255  | 10.9954  |
| PITG_04506 | 3.277964 | 11.58547 | 13.29827 |
| PITG_14918 | 3.267718 | 9.8186   | 11.52688 |
| PITG_09752 | 3.267567 | 8.6543   | 10.36252 |
| PITG_10038 | 3.26568  | 9.44557  | 11.15295 |
| PITG_09897 | 3.26157  | 9.21547  | 10.92103 |
| PITG_22475 | 3.261495 | 9.98898  | 11.69452 |

|            |          |          |          |
|------------|----------|----------|----------|
| PITG_22653 | 3.259009 | 8.3423   | 10.04673 |
| PITG_13170 | 3.256901 | 9.36557  | 11.06907 |
| PITG_11919 | 3.252089 | 10.64837 | 12.34973 |
| PITG_09250 | 3.248184 | 10.38253 | 12.08217 |
| PITG_05663 | 3.245371 | 8.36733  | 10.06572 |
| PITG_21884 | 3.244546 | 12.0893  | 13.78732 |
| PITG_09637 | 3.237844 | 8.78752  | 10.48255 |
| PITG_13546 | 3.235675 | 9.39995  | 11.09402 |
| PITG_04671 | 3.230409 | 11.62303 | 13.31475 |
| PITG_03354 | 3.226343 | 10.0777  | 11.7676  |
| PITG_15483 | 3.225374 | 10.65622 | 12.34568 |
| PITG_02194 | 3.219939 | 10.3119  | 11.99893 |
| PITG_13052 | 3.218972 | 9.78538  | 11.47198 |
| PITG_18171 | 3.215218 | 10.11008 | 11.795   |
| PITG_22570 | 3.212693 | 9.6997   | 11.38348 |
| PITG_18265 | 3.206538 | 9.19047  | 10.87148 |
| PITG_12234 | 3.203169 | 9.74943  | 11.42893 |
| PITG_16168 | 3.200358 | 10.18493 | 11.86317 |
| PITG_07131 | 3.200173 | 10.42705 | 12.1052  |
| PITG_11089 | 3.199434 | 10.93165 | 12.60947 |
| PITG_00545 | 3.198215 | 9.41793  | 11.0952  |
| PITG_10980 | 3.197697 | 11.99372 | 13.67075 |
| PITG_13587 | 3.196811 | 10.4463  | 12.12293 |
| PITG_17491 | 3.185162 | 9.3869   | 11.05827 |
| PITG_08900 | 3.184242 | 8.8039   | 10.47485 |
| PITG_09977 | 3.183249 | 10.93797 | 12.60847 |
| PITG_11685 | 3.18255  | 9.48898  | 11.15917 |
| PITG_06941 | 3.181925 | 11.44445 | 13.11435 |
| PITG_04611 | 3.175132 | 11.30533 | 12.97215 |
| PITG_18538 | 3.174179 | 11.79797 | 13.46435 |
| PITG_08394 | 3.17088  | 11.93015 | 13.59503 |
| PITG_04648 | 3.164074 | 10.41628 | 12.07807 |
| PITG_07731 | 3.162977 | 9.94033  | 11.60162 |
| PITG_17388 | 3.15918  | 10.57183 | 12.23138 |
| PITG_03361 | 3.156845 | 8.95722  | 10.6157  |
| PITG_08872 | 3.155095 | 11.30732 | 12.965   |
| PITG_07961 | 3.155058 | 12.30545 | 13.96312 |
| PITG_00135 | 3.151925 | 9.15552  | 10.81175 |
| PITG_02700 | 3.150578 | 11.18703 | 12.84265 |
| PITG_08956 | 3.145814 | 10.45823 | 12.11167 |
| PITG_06142 | 3.143017 | 9.5275   | 11.17965 |
| PITG_11890 | 3.142146 | 9.77468  | 11.42643 |
| PITG_05353 | 3.141674 | 10.14442 | 11.79595 |
| PITG_08480 | 3.1358   | 9.48962  | 11.13845 |
| PITG_10518 | 3.135799 | 10.63723 | 12.28607 |
| PITG_14713 | 3.135618 | 9.74363  | 11.39238 |
| PITG_05989 | 3.128635 | 11.98203 | 13.62757 |

|            |          |          |          |
|------------|----------|----------|----------|
| PITG_20882 | 3.126828 | 8.52498  | 10.16968 |
| PITG_12484 | 3.126323 | 10.71308 | 12.35755 |
| PITG_07302 | 3.126287 | 10.10507 | 11.74952 |
| PITG_05532 | 3.125998 | 11.06678 | 12.7111  |
| PITG_14397 | 3.124192 | 12.49913 | 14.14262 |
| PITG_19252 | 3.12109  | 8.51408  | 10.15613 |
| PITG_09061 | 3.120225 | 8.5081   | 10.14975 |
| PITG_00979 | 3.119504 | 10.38505 | 12.02637 |
| PITG_21618 | 3.119396 | 10.88412 | 12.52538 |
| PITG_08567 | 3.118351 | 10.22042 | 11.8612  |
| PITG_01669 | 3.113636 | 11.7386  | 13.3772  |
| PITG_10943 | 3.105732 | 10.81685 | 12.45178 |
| PITG_20714 | 3.102003 | 11.02637 | 12.65957 |
| PITG_02801 | 3.099209 | 10.17425 | 11.80615 |
| PITG_09930 | 3.094987 | 9.95588  | 11.58582 |
| PITG_06817 | 3.092735 | 11.48528 | 13.11417 |
| PITG_19832 | 3.092557 | 9.6227   | 11.2515  |
| PITG_13563 | 3.091378 | 8.89753  | 10.52578 |
| PITG_05272 | 3.089486 | 8.51117  | 10.13853 |
| PITG_00219 | 3.088486 | 11.96792 | 13.59482 |
| PITG_16909 | 3.083389 | 10.44618 | 12.0707  |
| PITG_10899 | 3.082747 | 11.82588 | 13.4501  |
| PITG_09675 | 3.081857 | 10.46478 | 12.08858 |
| PITG_11373 | 3.080647 | 10.2663  | 11.88953 |
| PITG_15749 | 3.076663 | 9.12237  | 10.74373 |
| PITG_15994 | 3.075491 | 10.90515 | 12.52597 |
| PITG_11466 | 3.073821 | 10.51658 | 12.13662 |
| PITG_05669 | 3.072153 | 11.10175 | 12.721   |
| PITG_15947 | 3.071124 | 9.68162  | 11.30038 |
| PITG_05988 | 3.069421 | 10.679   | 12.29697 |
| PITG_13448 | 3.068322 | 8.48793  | 10.10538 |
| PITG_02762 | 3.068216 | 11.73298 | 13.35038 |
| PITG_00761 | 3.061771 | 8.60703  | 10.2214  |
| PITG_03834 | 3.058837 | 11.47112 | 13.0841  |
| PITG_05092 | 3.058767 | 9.83725  | 11.4502  |
| PITG_08407 | 3.058307 | 9.50943  | 11.12217 |
| PITG_10361 | 3.052554 | 11.81578 | 13.4258  |
| PITG_21033 | 3.05139  | 9.74627  | 11.35573 |
| PITG_12350 | 3.050333 | 9.58427  | 11.19323 |
| PITG_10233 | 3.048043 | 8.35973  | 9.96762  |
| PITG_19844 | 3.045826 | 8.85095  | 10.45778 |
| PITG_12783 | 3.04477  | 12.48962 | 14.09595 |
| PITG_00011 | 3.04259  | 10.1217  | 11.727   |
| PITG_03497 | 3.041255 | 10.09675 | 11.70142 |
| PITG_07653 | 3.040833 | 8.4789   | 10.08337 |
| PITG_21079 | 3.036621 | 10.22573 | 11.8282  |
| PITG_15280 | 3.033956 | 11.57135 | 13.17255 |

|            |          |          |          |
|------------|----------|----------|----------|
| PITG_10672 | 3.033815 | 8.44988  | 10.05102 |
| PITG_12778 | 3.03357  | 12.34108 | 13.9421  |
| PITG_16322 | 3.031118 | 11.52018 | 13.12003 |
| PITG_00261 | 3.029368 | 8.33087  | 9.92988  |
| PITG_17995 | 3.029088 | 10.01953 | 11.61842 |
| PITG_05761 | 3.028633 | 11.16002 | 12.75868 |
| PITG_14252 | 3.01812  | 11.37082 | 12.96447 |
| PITG_14828 | 3.0169   | 10.18582 | 11.77888 |
| PITG_02320 | 3.015541 | 10.02562 | 11.61803 |
| PITG_14971 | 3.013381 | 9.86073  | 11.45212 |
| PITG_22798 | 3.013138 | 10.18217 | 11.77343 |
| PITG_10368 | 3.007608 | 12.29522 | 13.88383 |
| PITG_11861 | 3.007539 | 9.43537  | 11.02395 |
| PITG_20736 | 3.005316 | 9.95343  | 11.54095 |
| PITG_00272 | 3.000945 | 10.83858 | 12.424   |
| PITG_06818 | 2.99703  | 8.88643  | 10.46997 |
| PITG_07365 | 2.996649 | 11.5517  | 13.13505 |
| PITG_18347 | 2.995783 | 11.4954  | 13.07833 |
| PITG_13395 | 2.995541 | 10.88135 | 12.46417 |
| PITG_15150 | 2.992463 | 12.29525 | 13.87658 |
| PITG_03717 | 2.991391 | 9.59973  | 11.18055 |
| PITG_12993 | 2.988248 | 8.57253  | 10.15183 |
| PITG_05724 | 2.98604  | 9.49887  | 11.0771  |
| PITG_00774 | 2.985971 | 8.54525  | 10.12345 |
| PITG_18091 | 2.985315 | 9.76017  | 11.33805 |
| PITG_08984 | 2.983212 | 11.92567 | 13.50253 |
| PITG_00989 | 2.982351 | 11.83957 | 13.41602 |
| PITG_01966 | 2.981111 | 11.32918 | 12.90503 |
| PITG_01655 | 2.980181 | 11.51393 | 13.08933 |
| PITG_22601 | 2.977738 | 10.95338 | 12.5276  |
| PITG_09199 | 2.977428 | 10.9021  | 12.47617 |
| PITG_02106 | 2.971346 | 10.78475 | 12.35587 |
| PITG_16907 | 2.970591 | 9.21878  | 10.78953 |
| PITG_11666 | 2.970522 | 9.2401   | 10.81082 |
| PITG_14364 | 2.968841 | 11.22213 | 12.79203 |
| PITG_19857 | 2.966647 | 9.92043  | 11.48927 |
| PITG_17252 | 2.964934 | 8.22635  | 9.79435  |
| PITG_08943 | 2.960861 | 9.34813  | 10.91415 |
| PITG_08632 | 2.958912 | 10.21792 | 11.78298 |
| PITG_15903 | 2.957169 | 9.96693  | 11.53115 |
| PITG_09346 | 2.95471  | 10.4849  | 12.04792 |
| PITG_00045 | 2.95181  | 12.3576  | 13.9192  |
| PITG_13486 | 2.947653 | 10.68832 | 12.24788 |
| PITG_10360 | 2.946768 | 12.27442 | 13.83355 |
| PITG_04705 | 2.94459  | 10.90145 | 12.45952 |
| PITG_13405 | 2.942753 | 11.55527 | 13.11243 |
| PITG_14239 | 2.940375 | 10.93137 | 12.48737 |

|            |          |          |          |
|------------|----------|----------|----------|
| PITG_20253 | 2.938133 | 9.77487  | 11.32977 |
| PITG_06827 | 2.936437 | 10.74525 | 12.29932 |
| PITG_15089 | 2.935521 | 11.35227 | 12.90588 |
| PITG_03431 | 2.933555 | 10.80915 | 12.3618  |
| PITG_02597 | 2.928273 | 10.29232 | 11.84237 |
| PITG_12513 | 2.928138 | 9.142    | 10.69198 |
| PITG_15952 | 2.925196 | 9.75763  | 11.30617 |
| PITG_03188 | 2.924824 | 9.97048  | 11.51883 |
| PITG_17401 | 2.92371  | 11.30098 | 12.84878 |
| PITG_06390 | 2.923608 | 11.38488 | 12.93263 |
| PITG_10000 | 2.922865 | 9.98912  | 11.5365  |
| PITG_00919 | 2.920401 | 10.60463 | 12.1508  |
| PITG_13059 | 2.920165 | 10.40183 | 11.94788 |
| PITG_16920 | 2.919828 | 8.69168  | 10.23757 |
| PITG_09270 | 2.918344 | 9.71933  | 11.26448 |
| PITG_20374 | 2.91794  | 10.97905 | 12.524   |
| PITG_17604 | 2.916423 | 10.61422 | 12.15842 |
| PITG_05112 | 2.91585  | 11.24552 | 12.78943 |
| PITG_09010 | 2.91282  | 11.34908 | 12.8915  |
| PITG_08698 | 2.912282 | 9.49517  | 11.03732 |
| PITG_21176 | 2.909827 | 11.6062  | 13.14713 |
| PITG_03322 | 2.907576 | 11.14082 | 12.68063 |
| PITG_15957 | 2.90593  | 10.43657 | 11.97557 |
| PITG_09824 | 2.904453 | 9.28153  | 10.8198  |
| PITG_12933 | 2.901368 | 10.6443  | 12.18103 |
| PITG_13061 | 2.900731 | 10.42008 | 11.9565  |
| PITG_03610 | 2.898922 | 10.62987 | 12.16538 |
| PITG_01322 | 2.897115 | 11.75852 | 13.29313 |
| PITG_10839 | 2.896646 | 10.37002 | 11.9044  |
| PITG_09210 | 2.896445 | 11.17698 | 12.71127 |
| PITG_16675 | 2.895776 | 11.97312 | 13.50707 |
| PITG_03845 | 2.894572 | 8.8894   | 10.42275 |
| PITG_16103 | 2.88956  | 9.83132  | 11.36217 |
| PITG_10097 | 2.886491 | 10.32387 | 11.85318 |
| PITG_14431 | 2.884158 | 8.94937  | 10.47752 |
| PITG_11783 | 2.881393 | 11.46023 | 12.987   |
| PITG_00882 | 2.878665 | 11.02093 | 12.54633 |
| PITG_13957 | 2.874644 | 11.34593 | 12.86932 |
| PITG_09557 | 2.874079 | 9.71503  | 11.23813 |
| PITG_10364 | 2.873714 | 12.42747 | 13.95038 |
| PITG_00067 | 2.868639 | 12.2738  | 13.79417 |
| PITG_16058 | 2.867049 | 11.08042 | 12.59998 |
| PITG_12435 | 2.86321  | 9.24035  | 10.75798 |
| PITG_05585 | 2.860796 | 8.84403  | 10.36045 |
| PITG_18245 | 2.858252 | 9.94553  | 11.46067 |
| PITG_16128 | 2.856305 | 10.45968 | 11.97383 |
| PITG_04266 | 2.855678 | 8.80238  | 10.31622 |

|            |          |          |          |
|------------|----------|----------|----------|
| PITG_02856 | 2.853996 | 12.21335 | 13.72633 |
| PITG_13134 | 2.852117 | 11.28392 | 12.79595 |
| PITG_03310 | 2.851821 | 9.81155  | 11.32343 |
| PITG_05014 | 2.846094 | 8.96665  | 10.47563 |
| PITG_05856 | 2.845963 | 10.41212 | 11.92103 |
| PITG_18257 | 2.845864 | 9.0521   | 10.56097 |
| PITG_01253 | 2.845831 | 9.60025  | 11.1091  |
| PITG_17265 | 2.845601 | 9.96363  | 11.47237 |
| PITG_01860 | 2.844812 | 11.06903 | 12.57737 |
| PITG_06439 | 2.843958 | 10.58133 | 12.08923 |
| PITG_06833 | 2.842742 | 9.064    | 10.57128 |
| PITG_09190 | 2.840248 | 10.5205  | 12.02652 |
| PITG_06929 | 2.835854 | 10.84788 | 12.35167 |
| PITG_06762 | 2.828296 | 11.44218 | 12.94212 |
| PITG_14491 | 2.827904 | 8.4218   | 9.92153  |
| PITG_13775 | 2.826239 | 10.07063 | 11.56952 |
| PITG_06611 | 2.825978 | 10.85633 | 12.35508 |
| PITG_16462 | 2.825847 | 8.9618   | 10.46048 |
| PITG_03163 | 2.825259 | 10.61665 | 12.11503 |
| PITG_04677 | 2.823073 | 10.12007 | 11.61733 |
| PITG_04756 | 2.81926  | 10.56395 | 12.05927 |
| PITG_12530 | 2.812851 | 11.68078 | 13.17282 |
| PITG_22551 | 2.811942 | 9.98252  | 11.47408 |
| PITG_20125 | 2.804577 | 10.89237 | 12.38015 |
| PITG_16759 | 2.803865 | 11.48168 | 12.9691  |
| PITG_04515 | 2.802408 | 10.51362 | 12.00028 |
| PITG_14979 | 2.802148 | 10.18233 | 11.66887 |
| PITG_13626 | 2.801048 | 10.08345 | 11.56942 |
| PITG_10401 | 2.80066  | 10.82725 | 12.31302 |
| PITG_01020 | 2.799075 | 9.30927  | 10.79422 |
| PITG_10089 | 2.798202 | 10.32773 | 11.81223 |
| PITG_13860 | 2.797006 | 9.25182  | 10.7357  |
| PITG_21872 | 2.79636  | 10.23852 | 11.72207 |
| PITG_11661 | 2.795811 | 8.9151   | 10.39837 |
| PITG_10595 | 2.795197 | 11.64573 | 13.12868 |
| PITG_13042 | 2.794616 | 11.3421  | 12.82475 |
| PITG_14257 | 2.793648 | 11.96217 | 13.44432 |
| PITG_16912 | 2.791421 | 10.3084  | 11.7894  |
| PITG_03514 | 2.790293 | 8.67018  | 10.1506  |
| PITG_22163 | 2.789777 | 10.06762 | 11.54777 |
| PITG_01553 | 2.78469  | 9.4471   | 10.92462 |
| PITG_03155 | 2.784272 | 11.5348  | 13.0121  |
| PITG_02796 | 2.783018 | 10.55893 | 12.03558 |
| PITG_05565 | 2.782664 | 11.6981  | 13.17457 |
| PITG_15235 | 2.777942 | 8.64122  | 10.11523 |
| PITG_20717 | 2.777622 | 10.38348 | 11.85733 |
| PITG_13678 | 2.77605  | 8.69985  | 10.17288 |

|            |          |          |          |
|------------|----------|----------|----------|
| PITG_08838 | 2.774478 | 8.90028  | 10.3725  |
| PITG_22267 | 2.77403  | 11.20428 | 12.67627 |
| PITG_15843 | 2.773838 | 9.48875  | 10.96063 |
| PITG_12737 | 2.773773 | 9.36502  | 10.83687 |
| PITG_22899 | 2.773709 | 11.29163 | 12.76345 |
| PITG_07290 | 2.769739 | 8.66072  | 10.13047 |
| PITG_17032 | 2.765902 | 10.4682  | 11.93595 |
| PITG_21946 | 2.764943 | 8.30843  | 9.77568  |
| PITG_08530 | 2.764464 | 9.7598   | 11.2268  |
| PITG_09896 | 2.762676 | 10.60172 | 12.06778 |
| PITG_13420 | 2.762198 | 9.99455  | 11.46037 |
| PITG_05317 | 2.759583 | 11.51768 | 12.98213 |
| PITG_13914 | 2.759583 | 9.59122  | 11.05567 |
| PITG_05293 | 2.757256 | 10.82465 | 12.28788 |
| PITG_20040 | 2.752387 | 8.48635  | 9.94703  |
| PITG_11087 | 2.750798 | 10.42715 | 11.887   |
| PITG_11854 | 2.750543 | 8.83003  | 10.28975 |
| PITG_13469 | 2.749971 | 11.36067 | 12.82008 |
| PITG_04089 | 2.748765 | 8.62653  | 10.08532 |
| PITG_06308 | 2.744005 | 8.71463  | 10.17092 |
| PITG_01325 | 2.74372  | 10.26302 | 11.71915 |
| PITG_13429 | 2.737831 | 9.7198   | 11.17283 |
| PITG_20289 | 2.735807 | 8.9765   | 10.42847 |
| PITG_16169 | 2.734701 | 9.76627  | 11.21765 |
| PITG_02789 | 2.734417 | 11.04007 | 12.4913  |
| PITG_13399 | 2.733091 | 11.94013 | 13.39067 |
| PITG_07433 | 2.733027 | 9.35633  | 10.80683 |
| PITG_03449 | 2.732049 | 9.69108  | 11.14107 |
| PITG_05609 | 2.729588 | 9.76985  | 11.21853 |
| PITG_07216 | 2.727634 | 9.66945  | 11.1171  |
| PITG_19849 | 2.723446 | 10.42028 | 11.86572 |
| PITG_11538 | 2.72332  | 9.07277  | 10.51813 |
| PITG_13997 | 2.720428 | 11.73202 | 13.17585 |
| PITG_13979 | 2.718888 | 9.50225  | 10.94527 |
| PITG_18360 | 2.711109 | 11.24882 | 12.6877  |
| PITG_01625 | 2.710546 | 9.57827  | 11.01685 |
| PITG_06976 | 2.70945  | 8.2985   | 9.7365   |
| PITG_08781 | 2.708981 | 11.34822 | 12.78597 |
| PITG_03024 | 2.708042 | 11.34592 | 12.78317 |
| PITG_15445 | 2.707729 | 8.43392  | 9.871    |
| PITG_15820 | 2.705728 | 10.04798 | 11.484   |
| PITG_08538 | 2.704634 | 10.43425 | 11.86968 |
| PITG_06900 | 2.704571 | 10.2381  | 11.6735  |
| PITG_14442 | 2.703915 | 9.60422  | 11.03927 |
| PITG_14106 | 2.703041 | 10.80845 | 12.24303 |
| PITG_12214 | 2.700669 | 9.67747  | 11.11078 |
| PITG_04919 | 2.696709 | 9.49527  | 10.92647 |



|            |          |          |          |
|------------|----------|----------|----------|
| PITG_12798 | 2.69537  | 8.78455  | 10.21503 |
| PITG_05623 | 2.695308 | 10.83633 | 12.26678 |
| PITG_20275 | 2.687255 | 10.69393 | 12.12007 |
| PITG_04426 | 2.686231 | 9.61403  | 11.03962 |
| PITG_14237 | 2.685517 | 10.91578 | 12.34098 |
| PITG_11537 | 2.684711 | 10.65743 | 12.0822  |
| PITG_08307 | 2.683594 | 10.1329  | 11.55707 |
| PITG_11293 | 2.683439 | 11.36027 | 12.78435 |
| PITG_12121 | 2.683316 | 11.06317 | 12.48718 |
| PITG_00078 | 2.682603 | 11.20015 | 12.62378 |
| PITG_19240 | 2.682448 | 8.65308  | 10.07663 |
| PITG_20616 | 2.681766 | 9.36962  | 10.7928  |
| PITG_10725 | 2.681487 | 10.96523 | 12.38827 |
| PITG_10309 | 2.680558 | 9.42382  | 10.84635 |
| PITG_00223 | 2.679877 | 11.2626  | 12.68477 |
| PITG_20866 | 2.678917 | 9.25413  | 10.67578 |
| PITG_09005 | 2.678422 | 9.5293   | 10.95068 |
| PITG_12426 | 2.677463 | 9.28343  | 10.7043  |
| PITG_07973 | 2.676226 | 11.13183 | 12.55203 |
| PITG_19466 | 2.672611 | 10.56938 | 11.98763 |
| PITG_00718 | 2.670574 | 10.82792 | 12.24507 |
| PITG_21577 | 2.670451 | 12.73692 | 14.154   |
| PITG_16710 | 2.66968  | 10.40473 | 11.8214  |
| PITG_12100 | 2.66857  | 11.56163 | 12.9777  |
| PITG_00698 | 2.66632  | 11.11785 | 12.5327  |
| PITG_13418 | 2.665211 | 10.4167  | 11.83095 |
| PITG_21786 | 2.66438  | 9.30335  | 10.71715 |
| PITG_00013 | 2.663057 | 9.16773  | 10.58082 |
| PITG_08439 | 2.662534 | 8.5471   | 9.9599   |
| PITG_12818 | 2.651208 | 9.89857  | 11.30522 |
| PITG_19016 | 2.650841 | 9.74158  | 11.14803 |
| PITG_06767 | 2.650535 | 11.02683 | 12.43312 |
| PITG_10678 | 2.649249 | 9.41587  | 10.82145 |
| PITG_11572 | 2.649218 | 12.45362 | 13.85918 |
| PITG_07401 | 2.646098 | 9.18348  | 10.58735 |
| PITG_12939 | 2.644143 | 9.67322  | 11.07602 |
| PITG_14757 | 2.636395 | 9.89978  | 11.29835 |
| PITG_20272 | 2.63536  | 9.85248  | 11.25048 |
| PITG_08800 | 2.632743 | 10.99038 | 12.38695 |
| PITG_04658 | 2.632256 | 11.20378 | 12.60008 |
| PITG_11170 | 2.631527 | 12.14575 | 13.54165 |
| PITG_11451 | 2.630463 | 11.37348 | 12.7688  |
| PITG_17560 | 2.629157 | 10.08137 | 11.47597 |
| PITG_10321 | 2.628944 | 9.53065  | 10.92513 |
| PITG_19555 | 2.624877 | 11.96493 | 13.35718 |
| PITG_03415 | 2.624574 | 10.63033 | 12.02242 |
| PITG_17090 | 2.624241 | 9.49547  | 10.88737 |

|            |          |          |          |
|------------|----------|----------|----------|
| PITG_11750 | 2.62     | 11.98547 | 13.37503 |
| PITG_12930 | 2.616642 | 10.27797 | 11.66568 |
| PITG_17511 | 2.614769 | 10.35865 | 11.74533 |
| PITG_20104 | 2.613923 | 10.40277 | 11.78898 |
| PITG_16770 | 2.612444 | 10.9802  | 12.3656  |
| PITG_09144 | 2.612323 | 10.96525 | 12.35058 |
| PITG_18728 | 2.612172 | 9.70212  | 11.08737 |
| PITG_12296 | 2.609216 | 9.73232  | 11.11593 |
| PITG_07259 | 2.60783  | 9.73507  | 11.11792 |
| PITG_08461 | 2.60485  | 10.0124  | 11.3936  |
| PITG_13855 | 2.604187 | 9.22055  | 10.60138 |
| PITG_16958 | 2.601872 | 8.0769   | 9.45645  |
| PITG_22165 | 2.599258 | 12.17657 | 13.55467 |
| PITG_20291 | 2.594698 | 12.79088 | 14.16645 |
| PITG_13756 | 2.594548 | 9.38463  | 10.76012 |
| PITG_05313 | 2.59275  | 9.18177  | 10.55625 |
| PITG_23093 | 2.590924 | 10.07547 | 11.44893 |
| PITG_09768 | 2.586109 | 12.24888 | 13.61967 |
| PITG_03813 | 2.58372  | 11.79058 | 13.16003 |
| PITG_03491 | 2.58023  | 10.84505 | 12.21255 |
| PITG_10774 | 2.578741 | 9.92018  | 11.28685 |
| PITG_04381 | 2.578353 | 11.60663 | 12.97308 |
| PITG_18951 | 2.577579 | 10.38435 | 11.75037 |
| PITG_00339 | 2.574633 | 9.37203  | 10.7364  |
| PITG_20381 | 2.570502 | 9.59822  | 10.96027 |
| PITG_08536 | 2.570145 | 10.65648 | 12.01833 |
| PITG_03755 | 2.568839 | 10.6935  | 12.05462 |
| PITG_18099 | 2.564866 | 10.11532 | 11.4742  |
| PITG_03102 | 2.563296 | 9.0831   | 10.4411  |
| PITG_05291 | 2.562319 | 11.50627 | 12.86372 |
| PITG_01047 | 2.559745 | 11.05337 | 12.40937 |
| PITG_08310 | 2.559272 | 11.97688 | 13.33262 |
| PITG_15695 | 2.558976 | 10.19108 | 11.54665 |
| PITG_13433 | 2.556081 | 10.66602 | 12.01995 |
| PITG_07398 | 2.55251  | 8.8176   | 10.16952 |
| PITG_00289 | 2.547708 | 10.40775 | 11.75695 |
| PITG_06927 | 2.547502 | 9.20697  | 10.55605 |
| PITG_20735 | 2.547355 | 10.98658 | 12.33558 |
| PITG_02800 | 2.541095 | 10.32332 | 11.66877 |
| PITG_05282 | 2.534557 | 12.08098 | 13.42272 |
| PITG_07022 | 2.531952 | 9.184    | 10.52425 |
| PITG_07118 | 2.531747 | 9.53392  | 10.87405 |
| PITG_00280 | 2.530314 | 11.7304  | 13.06972 |
| PITG_08357 | 2.528853 | 9.9068   | 11.24528 |
| PITG_10671 | 2.527481 | 10.02577 | 11.36347 |
| PITG_06239 | 2.526692 | 10.0754  | 11.41265 |
| PITG_19249 | 2.523921 | 9.52945  | 10.86512 |

|            |          |          |          |
|------------|----------|----------|----------|
| PITG_03325 | 2.523629 | 9.4658   | 10.8013  |
| PITG_00782 | 2.520483 | 9.99913  | 11.33283 |
| PITG_14964 | 2.520308 | 12.22335 | 13.55695 |
| PITG_03289 | 2.519056 | 9.25475  | 10.58763 |
| PITG_02651 | 2.518765 | 9.97488  | 11.3076  |
| PITG_04614 | 2.518213 | 8.72795  | 10.06035 |
| PITG_08528 | 2.516816 | 9.24038  | 10.57198 |
| PITG_07041 | 2.515828 | 12.24968 | 13.58072 |
| PITG_14564 | 2.511734 | 10.3805  | 11.70918 |
| PITG_04661 | 2.511066 | 8.85168  | 10.17998 |
| PITG_13597 | 2.509558 | 11.70433 | 13.03177 |
| PITG_17696 | 2.506574 | 9.93527  | 11.26098 |
| PITG_13575 | 2.505734 | 12.55135 | 13.87658 |
| PITG_09246 | 2.504519 | 9.75793  | 11.08247 |
| PITG_13138 | 2.50287  | 10.58777 | 11.91135 |
| PITG_19471 | 2.502321 | 9.77112  | 11.09438 |
| PITG_10223 | 2.500356 | 9.68903  | 11.01117 |
| PITG_00162 | 2.498941 | 9.1793   | 10.50062 |
| PITG_19553 | 2.489806 | 8.65952  | 9.97555  |
| PITG_19268 | 2.489777 | 10.6833  | 11.99932 |
| PITG_11812 | 2.48949  | 11.68863 | 13.00448 |
| PITG_07549 | 2.489116 | 9.46845  | 10.78408 |
| PITG_11030 | 2.488368 | 11.10492 | 12.42012 |
| PITG_10995 | 2.485352 | 9.60707  | 10.92052 |
| PITG_07283 | 2.485151 | 10.08078 | 11.39412 |
| PITG_06602 | 2.482339 | 12.42678 | 13.73848 |
| PITG_06457 | 2.478184 | 10.24778 | 11.55707 |
| PITG_02805 | 2.475809 | 11.33272 | 12.64062 |
| PITG_15086 | 2.475666 | 10.49328 | 11.8011  |
| PITG_02718 | 2.470923 | 10.34432 | 11.64937 |
| PITG_20920 | 2.466417 | 11.10232 | 12.40473 |
| PITG_06510 | 2.464964 | 11.05208 | 12.35365 |
| PITG_18275 | 2.464907 | 10.46425 | 11.76578 |
| PITG_11239 | 2.464566 | 10.37857 | 11.6799  |
| PITG_14794 | 2.461692 | 9.95185  | 11.2515  |
| PITG_13276 | 2.461606 | 10.10652 | 11.40612 |
| PITG_09367 | 2.460128 | 11.89838 | 13.19712 |
| PITG_01022 | 2.459901 | 9.78157  | 11.08017 |
| PITG_21578 | 2.45919  | 10.62122 | 11.9194  |
| PITG_09200 | 2.457401 | 11.73977 | 13.0369  |
| PITG_10557 | 2.457288 | 8.99485  | 10.29192 |
| PITG_17411 | 2.455925 | 10.17647 | 11.47273 |
| PITG_22923 | 2.455897 | 8.83577  | 10.13202 |
| PITG_15125 | 2.455018 | 9.55127  | 10.847   |
| PITG_07571 | 2.454847 | 10.24123 | 11.53687 |
| PITG_13727 | 2.45292  | 10.18683 | 11.48133 |
| PITG_15920 | 2.452778 | 10.94365 | 12.23807 |

|            |          |          |          |
|------------|----------|----------|----------|
| PITG_08235 | 2.451107 | 10.81037 | 12.1038  |
| PITG_05881 | 2.449126 | 8.84068  | 10.13295 |
| PITG_02161 | 2.448277 | 11.78582 | 13.07758 |
| PITG_22508 | 2.446863 | 9.4744   | 10.76533 |
| PITG_17936 | 2.446637 | 11.76478 | 13.05558 |
| PITG_00208 | 2.445168 | 13.13957 | 14.4295  |
| PITG_00704 | 2.443191 | 12.02078 | 13.30955 |
| PITG_02574 | 2.442429 | 11.204   | 12.49232 |
| PITG_17542 | 2.435976 | 12.15743 | 13.44193 |
| PITG_04387 | 2.434373 | 8.32437  | 9.60792  |
| PITG_20493 | 2.432068 | 9.10752  | 10.3897  |
| PITG_10986 | 2.431618 | 10.71965 | 12.00157 |
| PITG_18067 | 2.427745 | 12.01328 | 13.2929  |
| PITG_18019 | 2.42766  | 10.06088 | 11.34045 |
| PITG_05591 | 2.425642 | 11.00603 | 12.2844  |
| PITG_02923 | 2.418256 | 11.51822 | 12.79218 |
| PITG_19278 | 2.418144 | 9.39467  | 10.66857 |
| PITG_13158 | 2.417027 | 9.35783  | 10.63107 |
| PITG_05475 | 2.41644  | 9.73435  | 11.00723 |
| PITG_03016 | 2.415966 | 10.54343 | 11.81603 |
| PITG_19442 | 2.411337 | 9.1326   | 10.40243 |
| PITG_06860 | 2.411031 | 10.66112 | 11.93077 |
| PITG_22016 | 2.410362 | 10.5851  | 11.85435 |
| PITG_03777 | 2.40783  | 9.90587  | 11.1736  |
| PITG_10366 | 2.406773 | 12.57398 | 13.84108 |
| PITG_10488 | 2.404661 | 8.17522  | 9.44105  |
| PITG_02245 | 2.402994 | 11.85922 | 13.12405 |
| PITG_01426 | 2.400608 | 11.19133 | 12.45473 |
| PITG_02687 | 2.400331 | 9.1954   | 10.45863 |
| PITG_16453 | 2.399139 | 9.03868  | 10.3012  |
| PITG_05259 | 2.397172 | 10.56343 | 11.82477 |
| PITG_04924 | 2.395539 | 9.73782  | 10.99817 |
| PITG_10815 | 2.393962 | 11.4922  | 12.7516  |
| PITG_15546 | 2.391004 | 8.64172  | 9.89933  |
| PITG_03025 | 2.39001  | 10.06987 | 11.32688 |
| PITG_12706 | 2.388685 | 10.68315 | 11.93937 |
| PITG_02720 | 2.386616 | 9.23718  | 10.49215 |
| PITG_06354 | 2.386451 | 9.14108  | 10.39595 |
| PITG_19654 | 2.386423 | 11.25458 | 12.50943 |
| PITG_02266 | 2.385597 | 10.39625 | 11.6506  |
| PITG_10755 | 2.384852 | 9.80537  | 11.05927 |
| PITG_07558 | 2.384384 | 9.11267  | 10.36628 |
| PITG_19655 | 2.383971 | 9.16628  | 10.41965 |
| PITG_13964 | 2.380998 | 10.23855 | 11.49012 |
| PITG_20571 | 2.379211 | 9.60868  | 10.85917 |
| PITG_06740 | 2.376986 | 10.42377 | 11.6729  |
| PITG_00066 | 2.376574 | 11.22527 | 12.47415 |

|            |          |          |          |
|------------|----------|----------|----------|
| PITG_20287 | 2.376464 | 10.30502 | 11.55383 |
| PITG_15100 | 2.376437 | 10.39152 | 11.64032 |
| PITG_22814 | 2.370322 | 8.7123   | 9.95738  |
| PITG_16468 | 2.367504 | 11.10918 | 12.35255 |
| PITG_14229 | 2.36488  | 11.29343 | 12.5352  |
| PITG_10087 | 2.362968 | 9.80708  | 11.04768 |
| PITG_02842 | 2.362504 | 10.82852 | 12.06883 |
| PITG_12855 | 2.361331 | 9.67217  | 10.91177 |
| PITG_08154 | 2.36103  | 10.2762  | 11.51562 |
| PITG_00330 | 2.360131 | 11.54252 | 12.78138 |
| PITG_03028 | 2.359367 | 9.32393  | 10.56233 |
| PITG_13196 | 2.359285 | 10.41815 | 11.6565  |
| PITG_04468 | 2.358958 | 10.15057 | 11.38872 |
| PITG_04975 | 2.357324 | 10.76028 | 11.99743 |
| PITG_08304 | 2.355582 | 10.36123 | 11.59732 |
| PITG_05221 | 2.355473 | 9.338    | 10.57402 |
| PITG_10362 | 2.354031 | 12.92393 | 14.15907 |
| PITG_07562 | 2.353324 | 9.03215  | 10.26685 |
| PITG_12254 | 2.351449 | 11.18853 | 12.42208 |
| PITG_07243 | 2.351286 | 12.2209  | 13.45435 |
| PITG_01405 | 2.351096 | 11.13798 | 12.37132 |
| PITG_10891 | 2.351014 | 10.15997 | 11.39325 |
| PITG_09782 | 2.350417 | 10.37265 | 11.60557 |
| PITG_07799 | 2.349141 | 9.09922  | 10.33135 |
| PITG_16900 | 2.349087 | 11.62503 | 12.85713 |
| PITG_11197 | 2.347622 | 10.73917 | 11.97037 |
| PITG_16892 | 2.347595 | 9.25092  | 10.4821  |
| PITG_02499 | 2.347459 | 11.03588 | 12.26698 |
| PITG_07383 | 2.343963 | 9.55068  | 10.77963 |
| PITG_22626 | 2.34372  | 10.17118 | 11.39998 |
| PITG_09898 | 2.341906 | 9.49515  | 10.72283 |
| PITG_11546 | 2.339743 | 8.79343  | 10.01978 |
| PITG_05676 | 2.338716 | 8.94805  | 10.17377 |
| PITG_03587 | 2.336448 | 9.16962  | 10.39393 |
| PITG_14131 | 2.335638 | 11.29062 | 12.51443 |
| PITG_04062 | 2.335422 | 10.7187  | 11.94238 |
| PITG_11729 | 2.33375  | 10.73057 | 11.95322 |
| PITG_00584 | 2.330544 | 10.65342 | 11.87408 |
| PITG_16984 | 2.330302 | 10.91623 | 12.13675 |
| PITG_16799 | 2.328257 | 9.96713  | 11.18638 |
| PITG_00265 | 2.327342 | 10.39718 | 11.61587 |
| PITG_00271 | 2.326428 | 11.43415 | 12.65227 |
| PITG_17586 | 2.323125 | 9.63363  | 10.8497  |
| PITG_21115 | 2.321381 | 9.04728  | 10.26227 |
| PITG_13790 | 2.321113 | 11.33928 | 12.5541  |
| PITG_07286 | 2.321059 | 12.41497 | 13.62975 |
| PITG_15075 | 2.320979 | 11.24377 | 12.4585  |

|            |          |          |          |
|------------|----------|----------|----------|
| PITG_04702 | 2.320308 | 10.78573 | 12.00005 |
| PITG_03652 | 2.31988  | 10.77568 | 11.98973 |
| PITG_01019 | 2.319612 | 10.8172  | 12.03108 |
| PITG_13491 | 2.31862  | 9.64228  | 10.85555 |
| PITG_04440 | 2.31498  | 9.47598  | 10.68698 |
| PITG_13492 | 2.314553 | 10.05435 | 11.26508 |
| PITG_04633 | 2.311987 | 10.3451  | 11.55423 |
| PITG_14638 | 2.309131 | 9.13152  | 10.33887 |
| PITG_01448 | 2.307238 | 10.92842 | 12.13458 |
| PITG_21524 | 2.30476  | 9.4354   | 10.64002 |
| PITG_08624 | 2.303403 | 9.71207  | 10.91583 |
| PITG_07988 | 2.303296 | 10.86615 | 12.06985 |
| PITG_14066 | 2.302551 | 10.82442 | 12.02765 |
| PITG_10810 | 2.302019 | 9.14402  | 10.34692 |
| PITG_13262 | 2.301435 | 11.35692 | 12.55945 |
| PITG_14380 | 2.29891  | 11.97973 | 13.18068 |
| PITG_11674 | 2.295381 | 9.1783   | 10.37703 |
| PITG_04725 | 2.295115 | 12.0062  | 13.20477 |
| PITG_17893 | 2.295009 | 10.85147 | 12.04997 |
| PITG_08663 | 2.294718 | 9.51607  | 10.71438 |
| PITG_11236 | 2.293313 | 9.86333  | 11.06077 |
| PITG_10417 | 2.292651 | 10.41438 | 11.6114  |
| PITG_16499 | 2.289501 | 10.0506  | 11.24563 |
| PITG_18722 | 2.287016 | 10.14595 | 11.33942 |
| PITG_02226 | 2.285881 | 8.8352   | 10.02795 |
| PITG_14137 | 2.285432 | 11.85    | 13.04247 |
| PITG_14579 | 2.285352 | 11.22428 | 12.4167  |
| PITG_06862 | 2.282951 | 10.4947  | 11.6856  |
| PITG_12175 | 2.282687 | 9.46518  | 10.65592 |
| PITG_03550 | 2.281554 | 9.87763  | 11.06765 |
| PITG_14156 | 2.280948 | 11.63073 | 12.82037 |
| PITG_08650 | 2.280579 | 9.77027  | 10.95967 |
| PITG_13336 | 2.280184 | 11.23302 | 12.42217 |
| PITG_21278 | 2.278393 | 10.33375 | 11.52177 |
| PITG_06702 | 2.278314 | 11.18165 | 12.36962 |
| PITG_19991 | 2.278288 | 10.5438  | 11.73175 |
| PITG_20522 | 2.277709 | 9.09678  | 10.28437 |
| PITG_14109 | 2.272767 | 8.34765  | 9.5321   |
| PITG_17606 | 2.272767 | 10.39565 | 11.5801  |
| PITG_20621 | 2.272715 | 8.8732   | 10.05762 |
| PITG_16977 | 2.271612 | 10.12627 | 11.30998 |
| PITG_07724 | 2.270406 | 10.08663 | 11.26958 |
| PITG_02623 | 2.269461 | 12.54383 | 13.72618 |
| PITG_17003 | 2.269042 | 11.98942 | 13.1715  |
| PITG_12352 | 2.267889 | 9.66762  | 10.84897 |
| PITG_10621 | 2.265899 | 11.13565 | 12.31573 |
| PITG_01386 | 2.254749 | 10.14935 | 11.32232 |

|            |          |          |          |
|------------|----------|----------|----------|
| PITG_02192 | 2.252744 | 11.59437 | 12.76605 |
| PITG_05357 | 2.249935 | 10.78832 | 11.9582  |
| PITG_18579 | 2.249701 | 9.73858  | 10.90832 |
| PITG_05253 | 2.248532 | 9.43005  | 10.59903 |
| PITG_00923 | 2.24848  | 9.40025  | 10.5692  |
| PITG_12439 | 2.247935 | 9.40265  | 10.57125 |
| PITG_17280 | 2.24674  | 10.77215 | 11.93998 |
| PITG_07010 | 2.244898 | 9.77442  | 10.94107 |
| PITG_11248 | 2.244743 | 8.41175  | 9.5783   |
| PITG_11498 | 2.244302 | 10.36775 | 11.53402 |
| PITG_13607 | 2.243965 | 9.88078  | 11.04683 |
| PITG_01592 | 2.243498 | 11.0171  | 12.18285 |
| PITG_00036 | 2.242721 | 10.28305 | 11.4483  |
| PITG_01101 | 2.241167 | 10.47713 | 11.64138 |
| PITG_09940 | 2.236382 | 10.8485  | 12.00967 |
| PITG_01102 | 2.235555 | 9.61387  | 10.7745  |
| PITG_13444 | 2.233284 | 10.59037 | 11.74953 |
| PITG_22543 | 2.232149 | 9.91858  | 11.07702 |
| PITG_13032 | 2.232097 | 10.25195 | 11.41035 |
| PITG_15123 | 2.231607 | 9.6237   | 10.78178 |
| PITG_03044 | 2.23135  | 10.9145  | 12.07242 |
| PITG_14197 | 2.231092 | 10.08803 | 11.24578 |
| PITG_20620 | 2.230267 | 10.63337 | 11.79058 |
| PITG_02566 | 2.229057 | 9.43877  | 10.5952  |
| PITG_04202 | 2.228053 | 8.47798  | 9.63377  |
| PITG_16686 | 2.226843 | 9.88285  | 11.03785 |
| PITG_19358 | 2.225712 | 10.0886  | 11.24287 |
| PITG_10363 | 2.224118 | 12.63893 | 13.79217 |
| PITG_04523 | 2.224118 | 11.99445 | 13.14768 |
| PITG_16623 | 2.223245 | 11.35567 | 12.50833 |
| PITG_19114 | 2.222834 | 12.04365 | 13.19605 |
| PITG_04701 | 2.222012 | 10.7112  | 11.86307 |
| PITG_03311 | 2.220088 | 10.27633 | 11.42695 |
| PITG_00373 | 2.219267 | 8.95137  | 10.10145 |
| PITG_06657 | 2.218652 | 12.53778 | 13.68747 |
| PITG_07708 | 2.218396 | 9.67643  | 10.82595 |
| PITG_02136 | 2.214657 | 10.65475 | 11.80183 |
| PITG_22577 | 2.213813 | 11.26487 | 12.4114  |
| PITG_02019 | 2.212765 | 10.67833 | 11.82418 |
| PITG_14145 | 2.212535 | 9.63773  | 10.78343 |
| PITG_14743 | 2.210108 | 9.5255   | 10.66962 |
| PITG_11594 | 2.210006 | 9.86928  | 11.01333 |
| PITG_04054 | 2.205619 | 10.29803 | 11.43922 |
| PITG_13394 | 2.20381  | 11.76058 | 12.90058 |
| PITG_04271 | 2.201266 | 12.55548 | 13.69382 |
| PITG_04049 | 2.201139 | 8.8248   | 9.96305  |
| PITG_10624 | 2.200783 | 11.42038 | 12.5584  |

|            |          |          |          |
|------------|----------|----------|----------|
| PITG_19517 | 2.199537 | 10.61032 | 11.74752 |
| PITG_18747 | 2.197708 | 12.41672 | 13.55272 |
| PITG_05203 | 2.197378 | 12.6037  | 13.73948 |
| PITG_17549 | 2.197277 | 10.9816  | 12.11732 |
| PITG_19699 | 2.196186 | 12.712   | 13.847   |
| PITG_08953 | 2.195678 | 10.9414  | 12.07607 |
| PITG_20831 | 2.194993 | 10.87232 | 12.00653 |
| PITG_06552 | 2.192636 | 10.04182 | 11.17448 |
| PITG_08643 | 2.192257 | 9.99485  | 11.12727 |
| PITG_02088 | 2.190991 | 10.57565 | 11.70723 |
| PITG_11134 | 2.190788 | 10.22615 | 11.3576  |
| PITG_19269 | 2.188486 | 11.13708 | 12.26702 |
| PITG_18930 | 2.187551 | 9.98483  | 11.11415 |
| PITG_00281 | 2.186818 | 10.79707 | 11.9259  |
| PITG_03903 | 2.186515 | 11.4285  | 12.55713 |
| PITG_01115 | 2.185404 | 9.77365  | 10.90155 |
| PITG_19115 | 2.18505  | 10.77393 | 11.9016  |
| PITG_20764 | 2.182074 | 8.15232  | 9.27802  |
| PITG_09986 | 2.17963  | 10.3519  | 11.47598 |
| PITG_12442 | 2.179454 | 9.18515  | 10.30912 |
| PITG_18332 | 2.179353 | 9.22003  | 10.34393 |
| PITG_07830 | 2.178824 | 11.44652 | 12.57007 |
| PITG_02533 | 2.178799 | 12.15767 | 13.2812  |
| PITG_02231 | 2.177516 | 10.66105 | 11.78373 |
| PITG_14934 | 2.177189 | 10.61685 | 11.73932 |
| PITG_09537 | 2.175303 | 10.02468 | 11.1459  |
| PITG_00709 | 2.175027 | 10.66528 | 11.78632 |
| PITG_10110 | 2.173972 | 10.51568 | 11.63602 |
| PITG_00559 | 2.173269 | 10.69485 | 11.81472 |
| PITG_02227 | 2.172466 | 11.27093 | 12.39027 |
| PITG_03451 | 2.171939 | 12.45847 | 13.57745 |
| PITG_09585 | 2.168905 | 8.98985  | 10.10682 |
| PITG_08306 | 2.168679 | 12.43183 | 13.54865 |
| PITG_01365 | 2.167803 | 13.17225 | 14.28848 |
| PITG_13187 | 2.164199 | 11.51738 | 12.63122 |
| PITG_20895 | 2.163999 | 10.14795 | 11.26165 |
| PITG_22157 | 2.163674 | 10.61512 | 11.7286  |
| PITG_03498 | 2.163224 | 9.79683  | 10.91002 |
| PITG_21023 | 2.16295  | 10.82003 | 11.93303 |
| PITG_07034 | 2.161051 | 10.02167 | 11.1334  |
| PITG_07897 | 2.160128 | 10.22368 | 11.3348  |
| PITG_16093 | 2.159055 | 11.67788 | 12.78828 |
| PITG_22171 | 2.159005 | 12.01233 | 13.1227  |
| PITG_08471 | 2.157634 | 9.06967  | 10.17912 |
| PITG_01299 | 2.154645 | 9.47145  | 10.5789  |
| PITG_11528 | 2.152306 | 9.80625  | 10.91213 |
| PITG_03472 | 2.150517 | 12.91093 | 14.01562 |



|            |          |          |          |
|------------|----------|----------|----------|
| PITG_00508 | 2.150244 | 10.07043 | 11.17493 |
| PITG_06224 | 2.149945 | 9.21502  | 10.31932 |
| PITG_15942 | 2.148952 | 10.6152  | 11.71883 |
| PITG_15441 | 2.148381 | 9.90677  | 11.01002 |
| PITG_06050 | 2.147661 | 10.56028 | 11.66305 |
| PITG_19146 | 2.146669 | 11.42863 | 12.53073 |
| PITG_20196 | 2.146322 | 10.50417 | 11.60603 |
| PITG_05332 | 2.146025 | 11.4473  | 12.54897 |
| PITG_11303 | 2.144389 | 9.76528  | 10.86585 |
| PITG_07823 | 2.144216 | 11.98755 | 13.088   |
| PITG_18094 | 2.143572 | 10.45438 | 11.5544  |
| PITG_10473 | 2.1408   | 10.69998 | 11.79813 |
| PITG_05479 | 2.140083 | 10.80438 | 11.90205 |
| PITG_05395 | 2.139935 | 9.50618  | 10.60375 |
| PITG_03393 | 2.136995 | 9.87293  | 10.96852 |
| PITG_07325 | 2.135613 | 11.2084  | 12.30305 |
| PITG_13527 | 2.134503 | 9.6109   | 10.7048  |
| PITG_00788 | 2.134207 | 11.42852 | 12.52222 |
| PITG_14750 | 2.131866 | 9.44027  | 10.53238 |
| PITG_14607 | 2.131078 | 11.39388 | 12.48547 |
| PITG_05310 | 2.129478 | 10.34063 | 11.43113 |
| PITG_05545 | 2.1267   | 12.02413 | 13.11275 |
| PITG_07941 | 2.126307 | 10.55657 | 11.64492 |
| PITG_16913 | 2.124147 | 11.93672 | 13.0236  |
| PITG_23046 | 2.123729 | 9.7983   | 10.8849  |
| PITG_17863 | 2.123533 | 10.58387 | 11.67033 |
| PITG_05998 | 2.123263 | 12.43347 | 13.51975 |
| PITG_16433 | 2.121645 | 11.71748 | 12.80267 |
| PITG_04918 | 2.119955 | 11.06045 | 12.14448 |
| PITG_11076 | 2.119759 | 9.47375  | 10.55765 |
| PITG_13658 | 2.118755 | 9.7664   | 10.84962 |
| PITG_00847 | 2.117996 | 9.2046   | 10.2873  |
| PITG_05413 | 2.117923 | 12.45543 | 13.53808 |
| PITG_22825 | 2.117164 | 10.13548 | 11.21762 |
| PITG_08403 | 2.116382 | 10.26137 | 11.34297 |
| PITG_20241 | 2.115478 | 9.56465  | 10.64563 |
| PITG_10324 | 2.115209 | 11.16722 | 12.24802 |
| PITG_05421 | 2.11306  | 10.41547 | 11.4948  |
| PITG_09705 | 2.11201  | 10.42162 | 11.50023 |
| PITG_13303 | 2.111303 | 9.30262  | 10.38075 |
| PITG_12160 | 2.111059 | 10.3318  | 11.40977 |
| PITG_22451 | 2.110693 | 8.93248  | 10.0102  |
| PITG_02628 | 2.110449 | 11.97188 | 13.04943 |
| PITG_16190 | 2.109255 | 11.07658 | 12.15332 |
| PITG_09780 | 2.108353 | 11.67638 | 12.7525  |
| PITG_04196 | 2.107915 | 8.72358  | 9.7994   |
| PITG_07115 | 2.106552 | 10.72662 | 11.8015  |

|            |          |          |          |
|------------|----------|----------|----------|
| PITG_19351 | 2.102977 | 9.71522  | 10.78765 |
| PITG_20056 | 2.102783 | 10.04725 | 11.11955 |
| PITG_01950 | 2.102492 | 13.14162 | 14.21372 |
| PITG_02207 | 2.101836 | 10.80147 | 11.87312 |
| PITG_17734 | 2.10118  | 9.25692  | 10.32812 |
| PITG_17626 | 2.099603 | 11.1917  | 12.26182 |
| PITG_17597 | 2.098027 | 10.7862  | 11.85523 |
| PITG_16001 | 2.097712 | 10.62978 | 11.6986  |
| PITG_06318 | 2.097324 | 11.52332 | 12.59187 |
| PITG_13297 | 2.097131 | 8.5014   | 9.56982  |
| PITG_02766 | 2.093911 | 8.80127  | 9.86747  |
| PITG_21182 | 2.091831 | 10.65617 | 11.72093 |
| PITG_00746 | 2.090599 | 11.83152 | 12.89543 |
| PITG_21337 | 2.090575 | 10.9822  | 12.0461  |
| PITG_03888 | 2.088403 | 10.94507 | 12.00747 |
| PITG_04289 | 2.088137 | 9.0512   | 10.11342 |
| PITG_01154 | 2.087101 | 8.85447  | 9.91597  |
| PITG_01045 | 2.086642 | 11.40227 | 12.46345 |
| PITG_03944 | 2.085582 | 10.9486  | 12.00905 |
| PITG_04377 | 2.085341 | 10.95925 | 12.01953 |
| PITG_02629 | 2.085172 | 11.9876  | 13.04777 |
| PITG_08752 | 2.084041 | 11.67617 | 12.73555 |
| PITG_17275 | 2.083078 | 12.50422 | 13.56293 |
| PITG_13801 | 2.081274 | 8.77552  | 9.83298  |
| PITG_03134 | 2.078847 | 9.56142  | 10.6172  |
| PITG_17437 | 2.077646 | 8.80927  | 9.86422  |
| PITG_06989 | 2.076998 | 10.41517 | 11.46967 |
| PITG_00048 | 2.07345  | 10.07012 | 11.12215 |
| PITG_06899 | 2.072109 | 10.99588 | 12.04698 |
| PITG_13520 | 2.071511 | 9.17482  | 10.2255  |
| PITG_13045 | 2.07041  | 10.19435 | 11.24427 |
| PITG_13317 | 2.070315 | 9.71513  | 10.76498 |
| PITG_18004 | 2.06998  | 12.10667 | 13.15628 |
| PITG_13366 | 2.068832 | 11.9269  | 12.97572 |
| PITG_14405 | 2.06845  | 10.65265 | 11.7012  |
| PITG_08531 | 2.067494 | 9.14902  | 10.1969  |
| PITG_04562 | 2.066802 | 11.55712 | 12.60452 |
| PITG_04525 | 2.0663   | 12.21352 | 13.26057 |
| PITG_14537 | 2.064654 | 10.11432 | 11.16022 |
| PITG_17706 | 2.063748 | 11.00852 | 12.05378 |
| PITG_05519 | 2.061556 | 9.44607  | 10.4898  |
| PITG_13340 | 2.061413 | 11.74708 | 12.79072 |
| PITG_07940 | 2.058723 | 10.43947 | 11.48122 |
| PITG_02174 | 2.058652 | 8.588    | 9.6297   |
| PITG_17419 | 2.057606 | 9.1906   | 10.23157 |
| PITG_01998 | 2.057297 | 11.23778 | 12.27853 |
| PITG_04024 | 2.056774 | 8.71698  | 9.75737  |

|            |          |          |          |
|------------|----------|----------|----------|
| PITG_17952 | 2.056133 | 12.81377 | 13.8537  |
| PITG_22095 | 2.056109 | 9.52893  | 10.56885 |
| PITG_11061 | 2.055301 | 8.34582  | 9.38517  |
| PITG_16948 | 2.055301 | 8.8905   | 9.92985  |
| PITG_01623 | 2.052644 | 11.05393 | 12.09142 |
| PITG_02247 | 2.052549 | 9.71537  | 10.75278 |
| PITG_20193 | 2.052478 | 11.76578 | 12.80315 |
| PITG_20815 | 2.051909 | 11.03275 | 12.06972 |
| PITG_08640 | 2.051459 | 10.76458 | 11.80123 |
| PITG_02781 | 2.051103 | 10.06797 | 11.10437 |
| PITG_17789 | 2.051032 | 9.73068  | 10.76703 |
| PITG_00596 | 2.050345 | 8.85843  | 9.8943   |
| PITG_12138 | 2.045684 | 10.27728 | 11.30987 |
| PITG_22668 | 2.045448 | 10.55998 | 11.5924  |
| PITG_15622 | 2.044999 | 10.49617 | 11.52827 |
| PITG_16981 | 2.044739 | 9.19442  | 10.22633 |
| PITG_17920 | 2.044574 | 12.76268 | 13.79448 |
| PITG_11721 | 2.043912 | 11.13003 | 12.16137 |
| PITG_01237 | 2.043369 | 11.22638 | 12.25733 |
| PITG_10353 | 2.04318  | 9.80285  | 10.83367 |
| PITG_08018 | 2.04318  | 11.29725 | 12.32807 |
| PITG_06099 | 2.042921 | 9.76093  | 10.79157 |
| PITG_09206 | 2.042874 | 9.60973  | 10.64033 |
| PITG_09128 | 2.04285  | 8.49815  | 9.52873  |
| PITG_21639 | 2.041576 | 8.36012  | 9.3898   |
| PITG_05169 | 2.040114 | 10.29902 | 11.32767 |
| PITG_14441 | 2.038983 | 11.24508 | 12.27293 |
| PITG_15669 | 2.037523 | 8.99735  | 10.02417 |
| PITG_07710 | 2.036959 | 10.96602 | 11.99243 |
| PITG_11760 | 2.036159 | 11.1172  | 12.14305 |
| PITG_11021 | 2.035453 | 8.87453  | 9.89988  |
| PITG_05658 | 2.034748 | 10.05378 | 11.07863 |
| PITG_20103 | 2.033526 | 12.12935 | 13.15333 |
| PITG_01233 | 2.033385 | 11.79945 | 12.82333 |
| PITG_01349 | 2.031342 | 11.79493 | 12.81737 |
| PITG_05710 | 2.03092  | 8.69313  | 9.71527  |
| PITG_00594 | 2.028927 | 11.4919  | 12.51262 |
| PITG_03938 | 2.028505 | 11.83162 | 12.85203 |
| PITG_14832 | 2.027942 | 9.81338  | 10.8334  |
| PITG_02806 | 2.026327 | 10.18692 | 11.20578 |
| PITG_19623 | 2.026116 | 10.73328 | 11.752   |
| PITG_02531 | 2.025695 | 11.23637 | 12.25478 |
| PITG_07205 | 2.025086 | 9.52463  | 10.54262 |
| PITG_19227 | 2.024665 | 10.14468 | 11.16237 |
| PITG_01544 | 2.024595 | 11.89762 | 12.91525 |
| PITG_06109 | 2.024291 | 8.52817  | 9.54558  |
| PITG_20307 | 2.022608 | 11.95872 | 12.97493 |

|            |          |          |          |
|------------|----------|----------|----------|
| PITG_01588 | 2.022538 | 10.75563 | 11.7718  |
| PITG_03269 | 2.022141 | 11.81833 | 12.83422 |
| PITG_12535 | 2.021673 | 11.38648 | 12.40203 |
| PITG_07102 | 2.019199 | 12.11973 | 13.13352 |
| PITG_09980 | 2.018266 | 9.94447  | 10.95758 |
| PITG_15003 | 2.017777 | 9.11633  | 10.1291  |
| PITG_13903 | 2.017637 | 9.379    | 10.39167 |
| PITG_19402 | 2.016192 | 11.70687 | 12.7185  |
| PITG_08193 | 2.015121 | 8.34435  | 9.35522  |
| PITG_12984 | 2.014586 | 10.09677 | 11.10725 |
| PITG_13467 | 2.013841 | 11.17828 | 12.18823 |
| PITG_21283 | 2.012446 | 11.9451  | 12.95405 |
| PITG_15040 | 2.012283 | 10.78638 | 11.79522 |
| PITG_17693 | 2.010494 | 8.51978  | 9.52733  |
| PITG_00231 | 2.010192 | 11.11913 | 12.12647 |
| PITG_08680 | 2.009588 | 11.72365 | 12.73055 |
| PITG_02467 | 2.007639 | 12.20918 | 13.21468 |
| PITG_18377 | 2.007106 | 11.92598 | 12.9311  |
| PITG_20197 | 2.006596 | 11.13412 | 12.13887 |
| PITG_20922 | 2.006341 | 9.30902  | 10.31358 |
| PITG_15152 | 2.005646 | 10.53303 | 11.5371  |
| PITG_22191 | 2.004719 | 9.6608   | 10.6642  |
| PITG_06554 | 2.00414  | 8.41632  | 9.4193   |
| PITG_20637 | 2.003422 | 9.8814   | 10.88387 |
| PITG_01822 | 2.002266 | 10.76395 | 11.76558 |
