# Supplementary material for: Spraying of dsRNA Molecules Derived from Phytophthora Infestans, as a Plant Protection Strategies for the Management of Potato Late Blight
Source: Preprints.org preprint supplement (doi:10.20944/preprints202102.0280.v1), 2021-02-11
Supplement: Supplementary file 5 [file supplementary]

## Common genes differentially expressed in sporangium, zoospore and during early infection

| SEQ_ID     | Fold change | Mycelium | Sporangium | Zoospores | Kbahar24 | Fold change 2 |
|------------|-------------|----------|------------|-----------|----------|---------------|
| PITG_02501 | 15.27517128 | 9.54883  | 13.48195   | 13.49043  | 11.3371  | 15.36525726   |
| PITG_23156 | 12.0073843  | 8.29853  | 11.88438   | 10.61073  | 10.63503 | 4.966398239   |
| PITG_06860 | 10.46886635 | 10.66112 | 14.04915   | 11.93077  | 12.9425  | 2.411030769   |
| PITG_10750 | 10.01946354 | 9.28905  | 12.61378   | 13.4118   | 11.63772 | 17.42093277   |
| PITG_06862 | 9.668217659 | 10.4947  | 13.76795   | 11.6856   | 12.96803 | 2.282951117   |
| PITG_08509 | 9.113256454 | 10.1173  | 13.30527   | 12.8057   | 13.35282 | 6.445981503   |
| PITG_20815 | 8.633426666 | 11.03275 | 14.14268   | 12.06972  | 13.42937 | 2.05190897    |
| PITG_13381 | 8.487953186 | 9.80047  | 12.88588   | 13.18977  | 12.0254  | 10.47806263   |
| PITG_13554 | 8.371483803 | 9.15473  | 12.22022   | 11.87985  | 12.12743 | 6.612137318   |
| PITG_18025 | 6.97390461  | 10.33733 | 13.1393    | 12.7476   | 11.98383 | 5.315725803   |
| PITG_12760 | 6.390667439 | 10.16922 | 12.84518   | 12.06555  | 11.33678 | 3.722658634   |
| PITG_13558 | 6.010909557 | 10.25432 | 12.8419    | 12.72587  | 12.67367 | 5.546393394   |
| PITG_20102 | 5.918302059 | 8.73853  | 11.30372   | 11.10988  | 10.9902  | 5.17425108    |
| PITG_16956 | 5.496195793 | 8.8471   | 11.30553   | 12.94315  | 11.48072 | 17.10148811   |
| PITG_11598 | 5.411892891 | 9.1074   | 11.54353   | 11.23815  | 11.58358 | 4.379450798   |
| PITG_09067 | 5.371592999 | 9.28255  | 11.7079    | 10.9954   | 11.12915 | 3.278077602   |
| PITG_02586 | 5.279007435 | 9.74972  | 12.14998   | 13.8918   | 12.48518 | 17.65596008   |
| PITG_10485 | 5.159984589 | 9.64505  | 12.01242   | 12.43437  | 11.35887 | 6.913022518   |
| PITG_18305 | 4.974035263 | 8.98455  | 11.29897   | 11.00845  | 10.9414  | 4.066816807   |
| PITG_19649 | 4.846242905 | 9.72672  | 12.00358   | 12.80038  | 12.43575 | 8.419103622   |
| PITG_13448 | 4.795672894 | 8.48793  | 10.74967   | 10.10538  | 9.95965  | 3.068322182   |
| PITG_08528 | 4.760291576 | 9.24038  | 11.49143   | 10.57198  | 10.95222 | 2.516816378   |
| PITG_08900 | 4.733968258 | 8.8039   | 11.04695   | 10.47485  | 12.18812 | 3.18424201    |
| PITG_00999 | 4.659311295 | 8.901    | 11.12112   | 12.08843  | 10.4451  | 9.109888077   |
| PITG_21786 | 4.59373188  | 9.30335  | 11.50302   | 10.71715  | 11.56118 | 2.664380312   |
| PITG_03223 | 4.39485836  | 10.16902 | 12.30483   | 13.52215  | 11.86138 | 10.21865463   |
| PITG_06227 | 4.284172535 | 10.14547 | 12.24448   | 12.55573  | 12.16878 | 5.315725327   |
| PITG_11946 | 4.195714951 | 9.57275  | 11.64167   | 12.11922  | 11.51213 | 5.842017651   |
| PITG_22343 | 4.009160042 | 8.39317  | 10.39647   | 12.78212  | 10.85552 | 20.95104027   |
| PITG_04089 | 4.008928299 | 8.62653  | 10.62975   | 10.08532  | 11.12987 | 2.748764515   |
| PITG_16168 | 3.899168968 | 10.18493 | 12.1481    | 11.86317  | 11.94895 | 3.200358152   |
| PITG_08613 | 3.871922493 | 11.6191  | 13.57215   | 14.166    | 13.00262 | 5.843772411   |
| PITG_13373 | 3.842113256 | 9.91092  | 11.85282   | 14.07447  | 11.83273 | 17.92063713   |
| PITG_16991 | 3.819851637 | 8.37867  | 10.31218   | 10.18827  | 9.8538   | 3.505450726   |
| PITG_02230 | 3.817910671 | 10.01453 | 11.94732   | 13.1396   | 11.11122 | 8.724464417   |
| PITG_00147 | 3.802153111 | 9.275    | 11.20182   | 11.19213  | 11.38002 | 3.776718616   |
| PITG_02830 | 3.767741442 | 9.41862  | 11.33232   | 11.41657  | 10.72263 | 3.994320154   |
| PITG_00343 | 3.717458487 | 10.27583 | 12.17015   | 12.30238  | 11.93675 | 4.074293613   |
| PITG_15125 | 3.716342211 | 9.55127  | 11.44515   | 10.847    | 11.72635 | 2.455017567   |
| PITG_06841 | 3.575264454 | 9.8761   | 11.71415   | 11.74663  | 11.52238 | 3.656677246   |
| PITG_11942 | 3.538243532 | 9.06255  | 10.88558   | 12.89642  | 12.64723 | 14.25965023   |
| PITG_10410 | 3.530322552 | 8.24632  | 10.06612   | 11.47968  | 11.14618 | 9.404600143   |
| PITG_14979 | 3.469152689 | 10.18233 | 11.97692   | 11.66887  | 11.53848 | 2.802148342   |
| PITG_00921 | 3.448136091 | 11.22393 | 13.00975   | 13.98107  | 12.84872 | 6.76051569    |
| PITG_05727 | 3.435531616 | 10.31015 | 12.09068   | 12.74995  | 12.80188 | 5.425664902   |

|            |             |          |          |          |          |             |
|------------|-------------|----------|----------|----------|----------|-------------|
| PITG_03881 | 3.420285225 | 9.30403  | 11.07815 | 12.25965 | 12.22978 | 7.757633686 |
| PITG_03811 | 3.410973072 | 9.09855  | 10.86873 | 11.0997  | 11.81613 | 4.003189564 |
| PITG_20620 | 3.386629105 | 10.63337 | 12.39322 | 11.79058 | 13.42618 | 2.230267286 |
| PITG_15388 | 3.384321451 | 8.71012  | 10.46898 | 13.92263 | 12.00212 | 37.07864761 |
| PITG_10408 | 3.318849802 | 10.26975 | 12.00043 | 12.64738 | 12.07692 | 5.196835041 |
| PITG_14405 | 3.306030273 | 10.65265 | 12.37775 | 11.7012  | 13.35702 | 2.068449736 |
| PITG_20621 | 3.22656703  | 8.8732   | 10.5632  | 10.05762 | 11.00543 | 2.272714853 |
| PITG_07717 | 3.22034812  | 10.39598 | 12.0832  | 12.5719  | 11.70482 | 4.518727779 |
| PITG_03882 | 3.206834793 | 9.4091   | 11.09025 | 11.75083 | 11.10357 | 5.069113255 |
| PITG_15980 | 3.139424324 | 9.22368  | 10.87418 | 12.31057 | 10.92945 | 8.4965868   |
| PITG_04977 | 3.131274462 | 10.66325 | 12.31    | 14.2093  | 13.0353  | 11.6806612  |
| PITG_07381 | 3.127767563 | 8.87718  | 10.52232 | 12.8834  | 11.74715 | 16.0690937  |
| PITG_07968 | 3.076308012 | 9.40803  | 11.02923 | 12.73803 | 11.52632 | 10.05610657 |
| PITG_00056 | 3.049663305 | 10.22372 | 11.83237 | 13.95357 | 11.92497 | 13.26773357 |
| PITG_03115 | 3.032449007 | 9.57592  | 11.1764  | 13.43587 | 11.86345 | 14.51980305 |
| PITG_19832 | 3.032308817 | 9.6227   | 11.22312 | 11.2515  | 11.42088 | 3.092556715 |
| PITG_09557 | 3.010667324 | 9.71503  | 11.30512 | 11.23813 | 11.88345 | 2.874079466 |
| PITG_09355 | 3.004170418 | 10.00283 | 11.5898  | 11.97875 | 12.22813 | 3.933781147 |
| PITG_09998 | 2.891864538 | 10.2846  | 11.8166  | 12.3036  | 12.03358 | 4.05302763  |
| PITG_01664 | 2.87334919  | 9.95553  | 11.47827 | 11.70705 | 11.84173 | 3.367123604 |
| PITG_16204 | 2.862448931 | 9.75425  | 11.2715  | 13.31445 | 10.9081  | 11.79578876 |
| PITG_00539 | 2.860796213 | 10.09458 | 11.611   | 13.05118 | 11.48385 | 7.762923241 |
| PITG_04289 | 2.840214729 | 9.0512   | 10.5572  | 10.11342 | 10.51468 | 2.088137388 |
| PITG_09356 | 2.826891899 | 9.33058  | 10.8298  | 12.88097 | 11.53762 | 11.71579838 |
| PITG_19655 | 2.786234379 | 9.16628  | 10.6446  | 10.41965 | 10.68257 | 2.383970976 |
| PITG_15441 | 2.774799109 | 9.90677  | 11.37915 | 11.01002 | 11.46723 | 2.148381233 |
| PITG_10039 | 2.737641096 | 8.6631   | 10.11603 | 10.8087  | 9.96178  | 4.424762249 |
| PITG_10403 | 2.736819029 | 9.13402  | 10.58652 | 11.71223 | 11.60045 | 5.972010612 |
| PITG_12210 | 2.693969011 | 11.45327 | 12.883   | 14.04888 | 13.72563 | 6.044473648 |
| PITG_05092 | 2.679071903 | 9.83725  | 11.25898 | 11.4502  | 12.33843 | 3.058766603 |
| PITG_01131 | 2.611991167 | 10.94555 | 12.3307  | 13.91217 | 12.39408 | 7.817008972 |
| PITG_15884 | 2.551684618 | 9.40278  | 10.75423 | 11.94168 | 11.35523 | 5.811457634 |
| PITG_13576 | 2.532683372 | 9.67195  | 11.01262 | 14.61015 | 12.38025 | 30.65817642 |
| PITG_05156 | 2.5196383   | 10.28445 | 11.61767 | 13.88805 | 12.49195 | 12.15602779 |
| PITG_18396 | 2.489518404 | 8.88305  | 10.19892 | 13.35837 | 11.89933 | 22.24357414 |
| PITG_09494 | 2.469638824 | 9.54678  | 10.85108 | 11.29513 | 11.49165 | 3.359740973 |
| PITG_10672 | 2.457826853 | 8.44988  | 9.74727  | 10.05102 | 10.52668 | 3.033815384 |
| PITG_11755 | 2.396368742 | 10.92462 | 12.18547 | 13.55423 | 12.22283 | 6.188615322 |
| PITG_18276 | 2.392247438 | 9.92613  | 11.1845  | 12.70587 | 11.76485 | 6.86725378  |
| PITG_09845 | 2.379568577 | 9.50362  | 10.75432 | 12.8483  | 11.35408 | 10.15897751 |
| PITG_02720 | 2.349656582 | 9.23718  | 10.46963 | 10.49215 | 11.30183 | 2.38661623  |
| PITG_10223 | 2.349140882 | 9.68903  | 10.92117 | 11.01117 | 12.5501  | 2.500355721 |
| PITG_04270 | 2.339418411 | 9.23103  | 10.45718 | 12.7269  | 11.39305 | 11.2813406  |
| PITG_18442 | 2.339040279 | 8.79517  | 10.02108 | 11.61037 | 10.90298 | 7.03816843  |
| PITG_15235 | 2.335934639 | 8.64122  | 9.86522  | 10.11523 | 10.01803 | 2.777942419 |
| PITG_22975 | 2.334100485 | 12.63437 | 13.85723 | 14.37792 | 14.04473 | 3.348581314 |
| PITG_13791 | 2.330678701 | 11.28185 | 12.5026  | 13.11597 | 13.03515 | 3.5655303   |

|            |             |          |          |          |          |             |
|------------|-------------|----------|----------|----------|----------|-------------|
| PITG_06788 | 2.325890779 | 9.06598  | 10.28377 | 13.28482 | 12.68198 | 18.62067223 |
| PITG_15195 | 2.323124886 | 11.51485 | 12.73092 | 14.66855 | 13.41365 | 8.899350166 |
| PITG_14382 | 2.300743341 | 9.44652  | 10.64862 | 11.93335 | 11.526   | 5.605462074 |
| PITG_04633 | 2.294479132 | 10.3451  | 11.54327 | 11.55423 | 12.52528 | 2.311987162 |
| PITG_12781 | 2.281843662 | 12.08898 | 13.27918 | 14.07072 | 13.41575 | 3.949673414 |
| PITG_03448 | 2.242772579 | 9.65625  | 10.82153 | 13.8612  | 12.41935 | 18.44234276 |
| PITG_18174 | 2.21895957  | 10.586   | 11.73588 | 13.97198 | 12.19412 | 10.45400143 |
| PITG_22157 | 2.204879761 | 10.61512 | 11.75582 | 11.7286  | 11.95985 | 2.163674355 |
| PITG_13342 | 2.201392889 | 10.59932 | 11.73773 | 12.73867 | 11.7495  | 4.40563488  |
| PITG_09386 | 2.19854641  | 9.55757  | 10.69412 | 13.02362 | 11.90793 | 11.05057907 |
| PITG_11264 | 2.190433979 | 8.86085  | 9.99207  | 10.9673  | 11.00618 | 4.306303501 |
| PITG_16981 | 2.176107645 | 9.19442  | 10.31617 | 10.22633 | 11.02623 | 2.044739008 |
| PITG_20289 | 2.170408487 | 8.9765   | 10.09447 | 10.42847 | 12.00943 | 2.735807419 |
| PITG_12769 | 2.16382432  | 12.5296  | 13.64318 | 14.2565  | 13.80305 | 3.310157776 |
| PITG_13192 | 2.122503042 | 9.22237  | 10.30813 | 11.20362 | 11.58182 | 3.94835043  |
| PITG_13655 | 2.118461132 | 10.75172 | 11.83473 | 13.89282 | 13.45975 | 8.821965218 |
| PITG_01973 | 2.118387699 | 10.29613 | 11.3791  | 13.09988 | 11.557   | 6.982530594 |
| PITG_14971 | 2.116479635 | 9.86073  | 10.9424  | 11.45212 | 12.31812 | 3.013381481 |
| PITG_12783 | 2.100719213 | 12.48962 | 13.5605  | 14.09595 | 13.91147 | 3.044770241 |
| PITG_03289 | 2.074719906 | 9.25475  | 10.30767 | 10.58763 | 10.81585 | 2.51905632  |
| PITG_12778 | 2.071008205 | 12.34108 | 13.39142 | 13.9421  | 13.5017  | 3.033570051 |
| PITG_08213 | 2.055657625 | 10.36358 | 11.40318 | 13.76458 | 12.5223  | 10.5633831  |
| PITG_22133 | 2.055586338 | 11.03962 | 12.07917 | 14.30278 | 12.76748 | 9.600879669 |
| PITG_08706 | 2.013934374 | 9.76165  | 10.77167 | 12.49163 | 11.61893 | 6.634479523 |

# Fold change 3

3.453996658  
5.050757885  
4.861438751  
5.093533039  
5.553254128  
9.418626785  
5.265668392  
4.674892902  
7.850039959  
3.130732059  
2.246325016  
5.349299431  
4.762327194  
6.205797672  
5.564234734  
3.596515894  
6.659743786  
3.280274868  
3.882134438  
6.538833618  
2.773517132  
3.27576828  
10.44120789  
2.916220903  
4.782726765  
3.231864452  
4.065172672  
3.835416794  
5.511137009  
5.669939518  
3.396424294  
2.60903573  
3.788998842  
2.780093431  
2.138624668  
4.302027225  
2.469153643  
3.162173748  
4.516118526  
3.130261898  
11.9976778  
7.463573933  
2.56001091  
3.083958387  
5.624533176

7.598686218  
6.577700615  
6.929813862  
9.794691086  
3.49954319  
6.517716885  
4.383955956  
2.47741127  
3.236572266  
3.262022257  
5.176762104  
7.310482979  
4.341770172  
3.251825809  
4.882206917  
3.477820158  
4.495297909  
4.676081181  
3.361216307  
3.696602583  
2.225068808  
2.619454861  
2.75773406  
4.617248535  
2.860531807  
2.949492216  
2.460042715  
5.526757717  
4.831150055  
5.661496162  
2.729304552  
3.870312452  
6.535511017  
4.618741989  
8.090806007  
3.850021839  
4.218704224  
2.459247112  
3.576916933  
3.60616827  
4.183324814  
7.265522957  
4.475399971  
4.31038475  
2.596947193  
2.658047199  
3.371288538

12.26095963  
3.72902894  
4.226558208  
4.532111168  
2.508398771  
6.788533688  
3.048536062  
2.539832592  
2.21942091  
5.099538326  
4.42394495  
3.559850454  
8.184721947  
2.417389393  
5.131746769  
6.534302711  
2.396396637  
5.492197037  
2.679288626  
2.950787544  
2.235529661  
4.465175152  
3.312376499  
3.623247385
