# Supplementary material for: Spraying of dsRNA Molecules Derived from Phytophthora Infestans, as a Plant Protection Strategies for the Management of Potato Late Blight
Source: Preprints.org preprint supplement (doi:10.20944/preprints202102.0280.v1), 2021-02-11

Fig.S 1

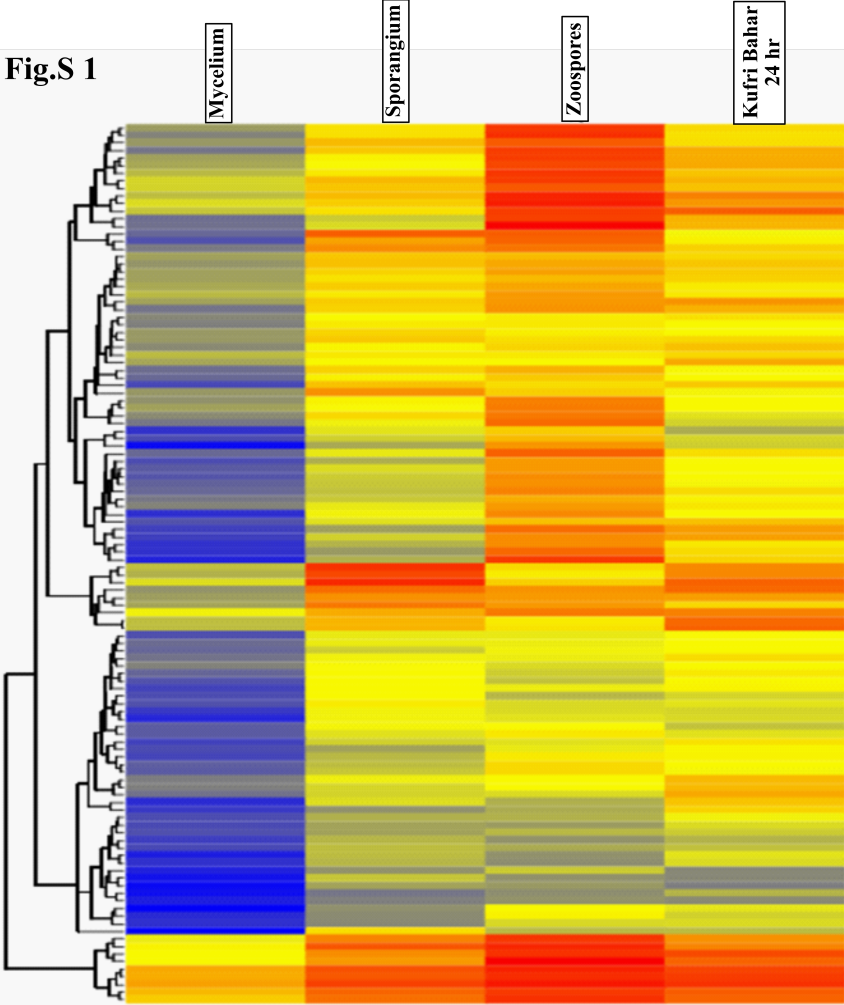

**Fig.S 2**

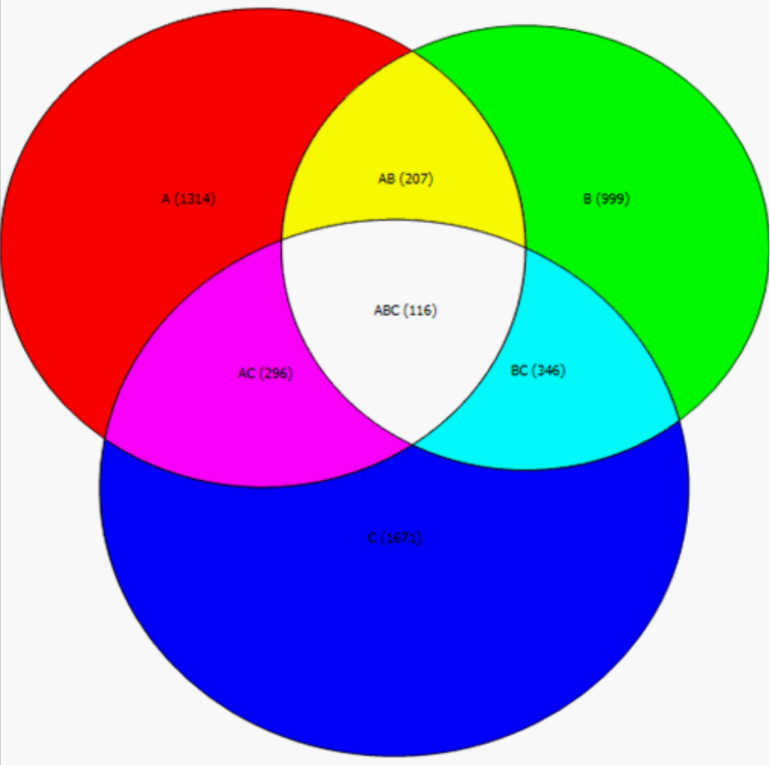

|   |                              |            |
|---|------------------------------|------------|
| A | Mycelium Vs Sporangium       | 1933 genes |
| B | Mycelium Vs Zoospore         | 1668 genes |
| C | Mycelium Vs Kufri bahar 24hr | 2429 genes |

**Fig.S 3a**

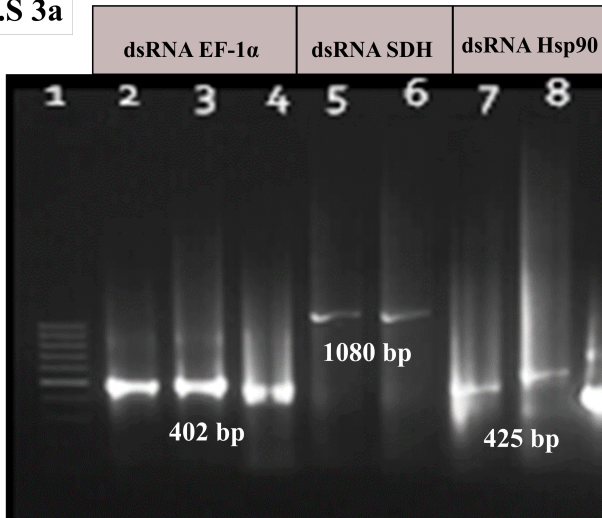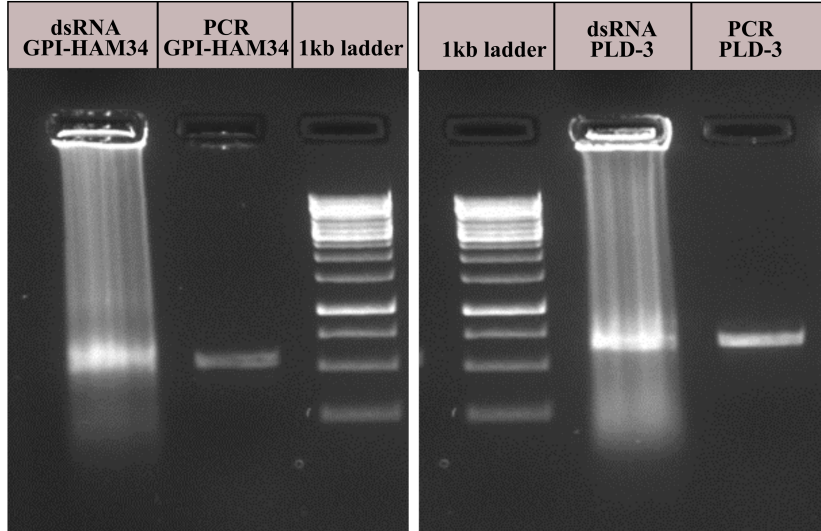

**Fig.S 3b**

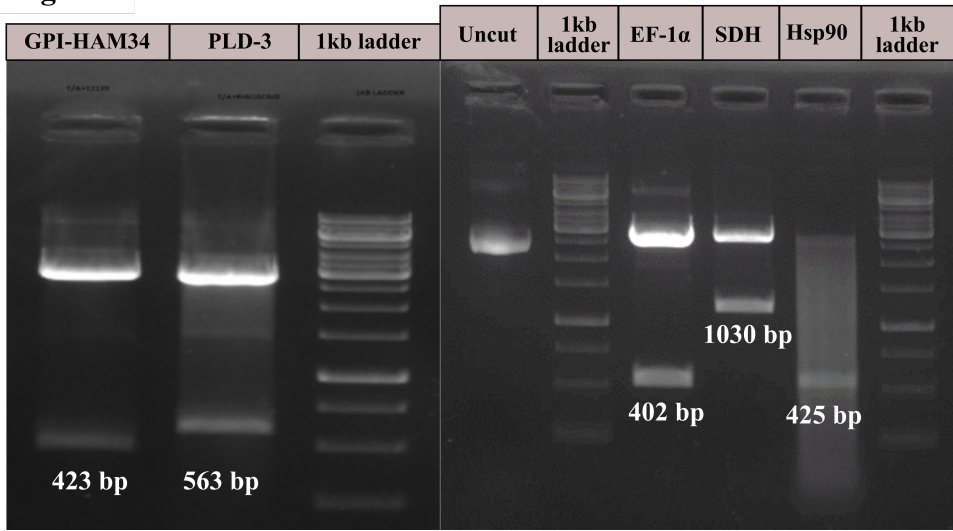



**Fig.S 4**

**Control T7 cells**

**Pi\_Hsp90**

**Pi\_EF-1 $\alpha$**

**Pi\_SDH**

**Combined dsRNA  
clones**

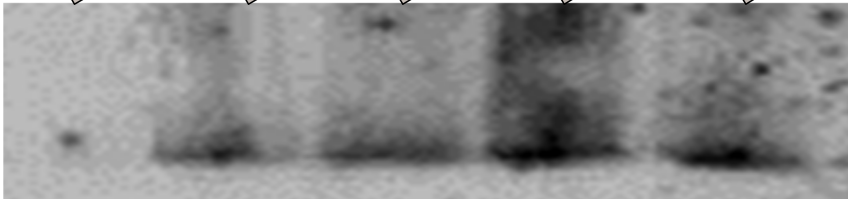

**Fig.S 5**

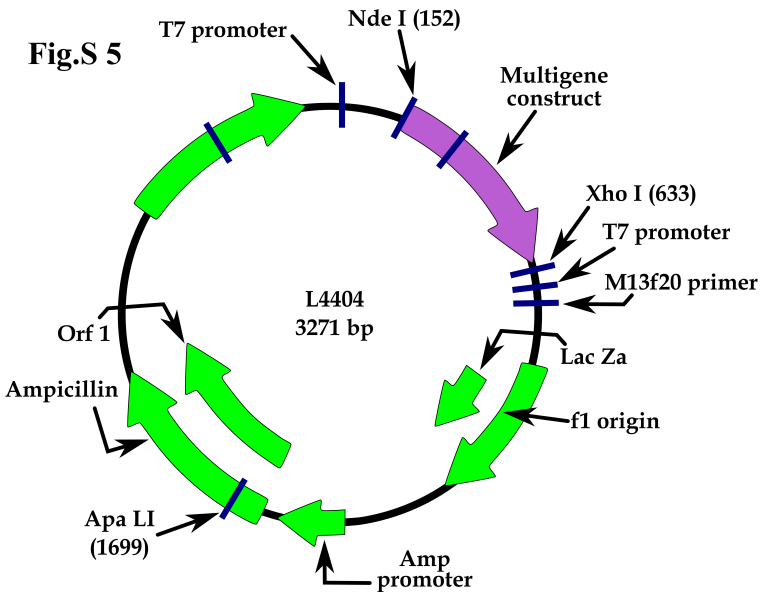

Supplement: Supplementary file 6 [file supplementary]
