# Supplementary material for: Spraying of dsRNA Molecules Derived from Phytophthora Infestans, as a Plant Protection Strategies for the Management of Potato Late Blight
Source: Preprints.org preprint supplement (doi:10.20944/preprints202102.0280.v1), 2021-02-11
Supplement: Supplementary file 7 [file supplementary]

Common genes differentially expressed in sporangium, zoospore and during early infection

| SEQ_ID     | Mycelium | Sporangium | Zoospores | Kbahar24 hr |
|------------|----------|------------|-----------|-------------|
| PITG_22975 | 12.63437 | 13.85723   | 14.37792  | 14.04473    |
| PITG_12783 | 12.48962 | 13.5605    | 14.09595  | 13.91147    |
| PITG_12769 | 12.5296  | 13.64318   | 14.2565   | 13.80305    |
| PITG_04142 | 11.45327 | 12.883     | 14.04888  | 13.72563    |
| PITG_06722 | 12.34108 | 13.39142   | 13.9421   | 13.5017     |
| PITG_13655 | 10.75172 | 11.83473   | 13.89282  | 13.45975    |
| PITG_20815 | 11.03275 | 14.14268   | 12.06972  | 13.42937    |
| PITG_20620 | 10.63337 | 12.39322   | 11.79058  | 13.42618    |
| PITG_12781 | 12.08898 | 13.27918   | 14.07072  | 13.41575    |
| PITG_06415 | 11.51485 | 12.73092   | 14.66855  | 13.41365    |
| PITG_14405 | 10.65265 | 12.37775   | 11.7012   | 13.35702    |
| PITG_08509 | 10.1173  | 13.30527   | 12.8057   | 13.35282    |
| PITG_04977 | 10.66325 | 12.31      | 14.2093   | 13.0353     |
| PITG_08943 | 11.28185 | 12.5026    | 13.11597  | 13.03515    |
| PITG_08613 | 11.6191  | 13.57215   | 14.166    | 13.00262    |
| PITG_06862 | 10.4947  | 13.76795   | 11.6856   | 12.96803    |
| PITG_06860 | 10.66112 | 14.04915   | 11.93077  | 12.9425     |
| PITG_20602 | 11.22393 | 13.00975   | 13.98107  | 12.84872    |
| PITG_05727 | 10.31015 | 12.09068   | 12.74995  | 12.80188    |
| PITG_22133 | 11.03962 | 12.07917   | 14.30278  | 12.76748    |
| PITG_06788 | 9.06598  | 10.28377   | 13.28482  | 12.68198    |
| PITG_13558 | 10.25432 | 12.8419    | 12.72587  | 12.67367    |
| PITG_04385 | 9.06255  | 10.88558   | 12.89642  | 12.64723    |
| PITG_10223 | 9.68903  | 10.92117   | 11.01117  | 12.5501     |
| PITG_04633 | 10.3451  | 11.54327   | 11.55423  | 12.52528    |
| PITG_08213 | 10.36358 | 11.40318   | 13.76458  | 12.5223     |
| PITG_05156 | 10.28445 | 11.61767   | 13.88805  | 12.49195    |
| PITG_02586 | 9.74972  | 12.14998   | 13.8918   | 12.48518    |
| PITG_19649 | 9.72672  | 12.00358   | 12.80038  | 12.43575    |
| PITG_03448 | 9.65625  | 10.82153   | 13.8612   | 12.41935    |
| PITG_01131 | 10.94555 | 12.3307    | 13.91217  | 12.39408    |
| PITG_13576 | 9.67195  | 11.01262   | 14.61015  | 12.38025    |
| PITG_05092 | 9.83725  | 11.25898   | 11.4502   | 12.33843    |
| PITG_14971 | 9.86073  | 10.9424    | 11.45212  | 12.31812    |
| PITG_03881 | 9.30403  | 11.07815   | 12.25965  | 12.22978    |
| PITG_09355 | 10.00283 | 11.5898    | 11.97875  | 12.22813    |
| PITG_11755 | 10.92462 | 12.18547   | 13.55423  | 12.22283    |
| PITG_18174 | 10.586   | 11.73588   | 13.97198  | 12.19412    |
| PITG_08900 | 8.8039   | 11.04695   | 10.47485  | 12.18812    |
| PITG_06227 | 10.14547 | 12.24448   | 12.55573  | 12.16878    |
| PITG_13554 | 9.15473  | 12.22022   | 11.87985  | 12.12743    |
| PITG_10408 | 10.26975 | 12.00043   | 12.64738  | 12.07692    |
| PITG_09998 | 10.2846  | 11.8166    | 12.3036   | 12.03358    |
| PITG_13381 | 9.80047  | 12.88588   | 13.18977  | 12.0254     |
| PITG_20289 | 8.9765   | 10.09447   | 10.42847  | 12.00943    |

|            |          |          |          |          |
|------------|----------|----------|----------|----------|
| PITG_15388 | 8.71012  | 10.46898 | 13.92263 | 12.00212 |
| PITG_18025 | 10.33733 | 13.1393  | 12.7476  | 11.98383 |
| PITG_22157 | 10.61512 | 11.75582 | 11.7286  | 11.95985 |
| PITG_16168 | 10.18493 | 12.1481  | 11.86317 | 11.94895 |
| PITG_00343 | 10.27583 | 12.17015 | 12.30238 | 11.93675 |
| PITG_00056 | 10.22372 | 11.83237 | 13.95357 | 11.92497 |
| PITG_09386 | 9.55757  | 10.69412 | 13.02362 | 11.90793 |
| PITG_18396 | 8.88305  | 10.19892 | 13.35837 | 11.89933 |
| PITG_09557 | 9.71503  | 11.30512 | 11.23813 | 11.88345 |
| PITG_03115 | 9.57592  | 11.1764  | 13.43587 | 11.86345 |
| PITG_03223 | 10.16902 | 12.30483 | 13.52215 | 11.86138 |
| PITG_01664 | 9.95553  | 11.47827 | 11.70705 | 11.84173 |
| PITG_13373 | 9.91092  | 11.85282 | 14.07447 | 11.83273 |
| PITG_03811 | 9.09855  | 10.86873 | 11.0997  | 11.81613 |
| PITG_18276 | 9.92613  | 11.1845  | 12.70587 | 11.76485 |
| PITG_13342 | 10.59932 | 11.73773 | 12.73867 | 11.7495  |
| PITG_07381 | 8.87718  | 10.52232 | 12.8834  | 11.74715 |
| PITG_15125 | 9.55127  | 11.44515 | 10.847   | 11.72635 |
| PITG_07717 | 10.39598 | 12.0832  | 12.5719  | 11.70482 |
| PITG_10750 | 9.28905  | 12.61378 | 13.4118  | 11.63772 |
| PITG_08706 | 9.76165  | 10.77167 | 12.49163 | 11.61893 |
| PITG_10403 | 9.13402  | 10.58652 | 11.71223 | 11.60045 |
| PITG_11598 | 9.1074   | 11.54353 | 11.23815 | 11.58358 |
| PITG_13192 | 9.22237  | 10.30813 | 11.20362 | 11.58182 |
| PITG_21786 | 9.30335  | 11.50302 | 10.71715 | 11.56118 |
| PITG_01973 | 10.29613 | 11.3791  | 13.09988 | 11.557   |
| PITG_14979 | 10.18233 | 11.97692 | 11.66887 | 11.53848 |
| PITG_09356 | 9.33058  | 10.8298  | 12.88097 | 11.53762 |
| PITG_07968 | 9.40803  | 11.02923 | 12.73803 | 11.52632 |
| PITG_14382 | 9.44652  | 10.64862 | 11.93335 | 11.526   |
| PITG_06841 | 9.8761   | 11.71415 | 11.74663 | 11.52238 |
| PITG_11946 | 9.57275  | 11.64167 | 12.11922 | 11.51213 |
| PITG_09494 | 9.54678  | 10.85108 | 11.29513 | 11.49165 |
| PITG_00539 | 10.09458 | 11.611   | 13.05118 | 11.48385 |
| PITG_16956 | 8.8471   | 11.30553 | 12.94315 | 11.48072 |
| PITG_15441 | 9.90677  | 11.37915 | 11.01002 | 11.46723 |
| PITG_19832 | 9.6227   | 11.22312 | 11.2515  | 11.42088 |
| PITG_04270 | 9.23103  | 10.45718 | 12.7269  | 11.39305 |
| PITG_00147 | 9.275    | 11.20182 | 11.19213 | 11.38002 |
| PITG_10485 | 9.64505  | 12.01242 | 12.43437 | 11.35887 |
| PITG_15884 | 9.40278  | 10.75423 | 11.94168 | 11.35523 |
| PITG_09845 | 9.50362  | 10.75432 | 12.8483  | 11.35408 |
| PITG_02501 | 9.54883  | 13.48195 | 13.49043 | 11.3371  |
| PITG_12760 | 10.16922 | 12.84518 | 12.06555 | 11.33678 |
| PITG_02720 | 9.23718  | 10.46963 | 10.49215 | 11.30183 |
| PITG_10410 | 8.24632  | 10.06612 | 11.47968 | 11.14618 |
| PITG_04089 | 8.62653  | 10.62975 | 10.08532 | 11.12987 |

|            |          |          |          |          |
|------------|----------|----------|----------|----------|
| PITG_09067 | 9.28255  | 11.7079  | 10.9954  | 11.12915 |
| PITG_02230 | 10.01453 | 11.94732 | 13.1396  | 11.11122 |
| PITG_03882 | 9.4091   | 11.09025 | 11.75083 | 11.10357 |
| PITG_16981 | 9.19442  | 10.31617 | 10.22633 | 11.02623 |
| PITG_11264 | 8.86085  | 9.99207  | 10.9673  | 11.00618 |
| PITG_20621 | 8.8732   | 10.5632  | 10.05762 | 11.00543 |
| PITG_20102 | 8.73853  | 11.30372 | 11.10988 | 10.9902  |
| PITG_08528 | 9.24038  | 11.49143 | 10.57198 | 10.95222 |
| PITG_18305 | 8.98455  | 11.29897 | 11.00845 | 10.9414  |
| PITG_15980 | 9.22368  | 10.87418 | 12.31057 | 10.92945 |
| PITG_16204 | 9.75425  | 11.2715  | 13.31445 | 10.9081  |
| PITG_18442 | 8.79517  | 10.02108 | 11.61037 | 10.90298 |
| PITG_22343 | 8.39317  | 10.39647 | 12.78212 | 10.85552 |
| PITG_03289 | 9.25475  | 10.30767 | 10.58763 | 10.81585 |
| PITG_02830 | 9.41862  | 11.33232 | 11.41657 | 10.72263 |
| PITG_19655 | 9.16628  | 10.6446  | 10.41965 | 10.68257 |
| PITG_23156 | 8.29853  | 11.88438 | 10.61073 | 10.63503 |
| PITG_10672 | 8.44988  | 9.74727  | 10.05102 | 10.52668 |
| PITG_04289 | 9.0512   | 10.5572  | 10.11342 | 10.51468 |
| PITG_00999 | 8.901    | 11.12112 | 12.08843 | 10.4451  |
| PITG_15235 | 8.64122  | 9.86522  | 10.11523 | 10.01803 |
| PITG_10039 | 8.6631   | 10.11603 | 10.8087  | 9.96178  |
| PITG_13448 | 8.48793  | 10.74967 | 10.10538 | 9.95965  |
| PITG_16991 | 8.37867  | 10.31218 | 10.18827 | 9.8538   |

on

DESCRIPTION

Glycine rich protein

Conserved hypothetical protein

Glycine rich protein

Sorbitol dehydrogenase

translation elongation factor 1-alpha, putative

Glucanase inhibitor protein

ATP binding cassette (ABC) superfamily

Pirin

ipiB1 family glycine rich protein

Heat shock protein 90

Pirin

Conserved hypothetical protein

Conserved hypothetical protein

Avr2

Cell 5A endo-1,4-betaglucanase

ATP binding cassette (ABC) superfamily

ATP binding cassette (ABC) superfamily

Phospholipase D, Pi-PLD-like-3

GPI-Anchored acidic serine threonine rich HAM34 like protein
