# Supplementary material for: Spraying of dsRNA Molecules Derived from Phytophthora Infestans, as a Plant Protection Strategies for the Management of Potato Late Blight
Source: Preprints.org preprint supplement (doi:10.20944/preprints202102.0280.v1), 2021-02-11
Supplement: Supplementary file 8 [file supplementary]

2 fold change Differential expressed genes in Mycelium vs Sporangium

| SEQ_ID     | DESCRIPTION                              | Mycelium | Sporangium | Fold change |
|------------|------------------------------------------|----------|------------|-------------|
| PITG_12551 | Elicitin precursor (INF1)                | 8.59442  | 14.21405   | 49.16750717 |
| PITG_12556 | Elicitin like INF6                       | 8.70743  | 13.94198   | 37.6492691  |
| PITG_16999 | Conserved hypothetical protein           | 8.43902  | 13.65272   | 37.10907364 |
| PITG_06202 | Conserved hypothetical protein           | 8.89462  | 13.44095   | 23.36590958 |
| PITG_11060 | Conserved hypothetical protein           | 9.39722  | 13.51552   | 17.36728096 |
| PITG_03742 | Conserved hypothetical protein           | 8.58947  | 12.6397    | 16.56691742 |
| PITG_10765 | Beta Glucan synthesis associated protein | 9.5479   | 13.48678   | 15.33635044 |
| PITG_02501 | Conserved hypothetical protein           | 9.54883  | 13.48195   | 15.27517128 |
| PITG_13660 | Conserved hypothetical protein           | 8.98762  | 12.91893   | 15.25612545 |
| PITG_00840 |                                          | 8.70857  | 12.61527   | 14.99801826 |
| PITG_03637 | Cellulose binding elicitor lectin        | 10.00708 | 13.9069    | 14.92663097 |
| PITG_12562 | Elicitin like protein                    | 9.3965   | 13.27382   | 14.69564342 |
| PITG_22317 |                                          | 9.38495  | 13.25422   | 14.61387348 |
| PITG_00127 |                                          | 8.6794   | 12.51402   | 14.26706505 |
| PITG_02139 |                                          | 8.99817  | 12.77543   | 13.71104527 |
| PITG_14950 |                                          | 8.93755  | 12.67513   | 13.33904362 |
| PITG_14721 |                                          | 9.30312  | 13.01768   | 13.12792206 |
| PITG_08659 |                                          | 9.36217  | 13.01568   | 12.58398247 |
| PITG_09370 |                                          | 8.60375  | 12.25507   | 12.56480789 |
| PITG_20344 |                                          | 8.22698  | 11.8772    | 12.55523109 |
| PITG_15731 | ATP Binding cassette (ABC Superfamily)   | 8.94282  | 12.58678   | 12.50095749 |
| PITG_00384 |                                          | 9.06653  | 12.69478   | 12.36551189 |
| PITG_16731 |                                          | 10.02318 | 13.61598   | 12.0653677  |
| PITG_23156 |                                          | 8.29853  | 11.88438   | 12.0073843  |
| PITG_02954 |                                          | 8.59923  | 12.1364    | 11.6089592  |
| PITG_16715 |                                          | 8.8556   | 12.3903    | 11.58912754 |
| PITG_07482 |                                          | 8.7879   | 12.29713   | 11.38634872 |
| PITG_00833 |                                          | 8.53502  | 12.03052   | 11.27847385 |
| PITG_00761 |                                          | 8.60703  | 12.09303   | 11.20445061 |
| PITG_03639 |                                          | 9.4509   | 12.90753   | 10.97868443 |
| PITG_05616 |                                          | 9.47085  | 12.92202   | 10.93716335 |
| PITG_06474 |                                          | 10.85657 | 14.30362   | 10.90599918 |
| PITG_03721 |                                          | 9.37887  | 12.81243   | 10.80454731 |
| PITG_12533 |                                          | 8.85242  | 12.26722   | 10.66491127 |
| PITG_14046 |                                          | 7.84205  | 11.23522   | 10.50618267 |
| PITG_11853 |                                          | 9.07208  | 12.46113   | 10.47624683 |
| PITG_06860 |                                          | 10.66112 | 14.04915   | 10.46886635 |
| PITG_21410 |                                          | 9.34402  | 12.72472   | 10.4157877  |
| PITG_09065 |                                          | 8.56708  | 11.93053   | 10.29198933 |
| PITG_06032 |                                          | 9.1032   | 12.46512   | 10.28105736 |
| PITG_07347 |                                          | 9.22832  | 12.56877   | 10.12921143 |
| PITG_10750 |                                          | 9.28905  | 12.61378   | 10.01946354 |
| PITG_16275 |                                          | 8.43388  | 11.75842   | 10.01807404 |
