# Supplementary material for: Spraying of dsRNA Molecules Derived from Phytophthora Infestans, as a Plant Protection Strategies for the Management of Potato Late Blight
Source: Preprints.org preprint supplement (doi:10.20944/preprints202102.0280.v1), 2021-02-11
Supplement: Supplementary file 9 [file supplementary]

15 fold chnage Differentially expressed genes in mYcellium vs zoospres

| SEQ_ID     | DECRPTION | Mycelium | Zoospores | Fold change |
|------------|-----------|----------|-----------|-------------|
| PITG_08178 |           | 8.30348  | 13.83783  | 46.34526443 |
| PITG_15388 |           | 8.71012  | 13.92263  | 37.07864761 |
| PITG_13496 |           | 9.07547  | 14.1133   | 32.85026932 |
| PITG_13396 |           | 8.3294   | 13.3156   | 31.69536591 |
| PITG_13576 |           | 9.67195  | 14.61015  | 30.65817642 |
| PITG_07409 |           | 8.39565  | 13.32617  | 30.49533463 |
| PITG_04125 |           | 8.994    | 13.91527  | 30.30043602 |
| PITG_12139 |           | 8.54627  | 13.4641   | 30.22841263 |
| PITG_18337 |           | 9.09563  | 14.00962  | 30.14785194 |
| PITG_15419 |           | 8.80005  | 13.70633  | 29.98737526 |
| PITG_22973 |           | 8.77578  | 13.56665  | 27.6818161  |
| PITG_07390 |           | 8.84832  | 13.62333  | 27.37935638 |
| PITG_13755 |           | 9.31608  | 14.00132  | 25.7273922  |
| PITG_07445 |           | 8.81742  | 13.45087  | 24.82032394 |
| PITG_07833 |           | 8.67783  | 13.28838  | 24.42945862 |
| PITG_01289 |           | 8.29162  | 12.88815  | 24.19326019 |
| PITG_06370 |           | 8.91752  | 13.4755   | 23.55535889 |
| PITG_18396 |           | 8.88305  | 13.35837  | 22.24357414 |
| PITG_15659 |           | 8.93183  | 13.38128  | 21.84831429 |
| PITG_00431 |           | 8.78172  | 13.2054   | 21.46156502 |
| PITG_20344 |           | 8.22698  | 12.63688  | 21.25749969 |
| PITG_16953 |           | 8.80578  | 13.2012   | 21.0451622  |
| PITG_22343 |           | 8.39317  | 12.78212  | 20.95104027 |
| PITG_07919 |           | 9.50303  | 13.88947  | 20.91452408 |
| PITG_09851 |           | 8.48328  | 12.85932  | 20.76429939 |
| PITG_09169 |           | 8.4209   | 12.79447  | 20.72882843 |
| PITG_13712 |           | 9.50615  | 13.85768  | 20.41465569 |
| PITG_04378 |           | 8.9599   | 13.2996   | 20.24789429 |
| PITG_05362 |           | 9.02237  | 13.3463   | 20.02781868 |
| PITG_02000 |           | 9.08958  | 13.41037  | 19.98413658 |
| PITG_18119 |           | 8.44733  | 12.75433  | 19.79411888 |
| PITG_00375 |           | 9.54355  | 13.844    | 19.70445633 |
| PITG_04949 |           | 8.63722  | 12.8944   | 19.12228966 |
| PITG_22117 |           | 8.23782  | 12.46778  | 18.764925   |
| PITG_06788 |           | 9.06598  | 13.28482  | 18.62067223 |
| PITG_03448 |           | 9.65625  | 13.8612   | 18.44234276 |
| PITG_22378 |           | 9.17643  | 13.36502  | 18.23430443 |
| PITG_07550 |           | 9.66045  | 13.8347   | 18.05404282 |
| PITG_13373 |           | 9.91092  | 14.07447  | 17.92063713 |
| PITG_13644 |           | 8.90603  | 13.05598  | 17.75249672 |
| PITG_17289 |           | 8.67912  | 12.82693  | 17.72626495 |
| PITG_02586 |           | 9.74972  | 13.8918   | 17.65596008 |
| PITG_10750 |           | 9.28905  | 13.4118   | 17.42093277 |
| PITG_11891 |           | 9.09835  | 13.19743  | 17.1374836  |
| PITG_16956 |           | 8.8471   | 12.94315  | 17.10148811 |

|            |         |          |             |
|------------|---------|----------|-------------|
| PITG_07960 | 9.61218 | 13.70218 | 17.02992249 |
| PITG_21945 | 8.8202  | 12.85055 | 16.34015846 |
| PITG_22562 | 9.06578 | 13.09248 | 16.29887009 |
| PITG_07381 | 8.87718 | 12.8834  | 16.0690937  |
| PITG_04693 | 9.3009  | 13.30297 | 16.02293587 |
| PITG_07836 | 8.20137 | 12.19732 | 15.95514774 |
| PITG_18284 | 9.49922 | 13.48823 | 15.87865353 |
| PITG_20537 | 9.85063 | 13.83293 | 15.80490017 |
| PITG_18386 | 8.78203 | 12.75527 | 15.70588493 |
| PITG_14492 | 8.86873 | 12.84153 | 15.70116806 |
| PITG_19245 | 8.67972 | 12.6355  | 15.51706028 |
| PITG_09218 | 9.50202 | 13.45593 | 15.49699593 |
| PITG_02501 | 9.54883 | 13.49043 | 15.36525726 |
| PITG_09979 | 9.01008 | 12.94615 | 15.30643749 |
| PITG_07143 | 8.32955 | 12.24983 | 15.13989544 |
| PITG_11936 | 8.4785  | 12.39487 | 15.0988493  |
